# Supplementary material for: Rh(iii)-catalyzed cascade annulation reaction of N,N-dimethyl enaminones with iodonium ylides to give substituted isocoumarins
Source: Royal Society of Chemistry journal article supplement (doi:10.1039/d3nj02073h), 2023-01-01
Supplement: d3nj02073h1.pdf [file d3nj02073h1.pdf]

## **Rh(III)-Catalyzed Cascade Annulation Reaction of *N,N*-Dimethyl Enaminones with Iodonium Ylides to Give Substituted Isocoumarins.**

Mingshuai Zhang,<sup>a</sup> Longkun Chen,<sup>a</sup> Donghan Liu,<sup>a</sup> Zhuoyuan Liu,<sup>a</sup> Jiuzhong Huang,<sup>\*b</sup> Xiang Li,<sup>\*c</sup>  
Fuchao Yu,<sup>\*a</sup>

<sup>a</sup>*Faculty of Life Science and Technology, Kunming University of Science and Technology, Kunming, 650504, P. R. China.*

<sup>b</sup>*School of Pharmacy, Key Laboratory of Prevention and Treatment of Cardiovascular and Cerebrovascular Diseases of Ministry of Education, Gannan Medical University, Ganzhou 341000, PR China.*

### **Supporting Information**

#### **Table of Contents**

|                                                                                   |    |
|-----------------------------------------------------------------------------------|----|
| 1. General information.....                                                       | 2  |
| 2. General procedure.....                                                         | 3  |
| 4. X-ray Structure and Data <sup>3</sup> of <b>3b</b> (CCDC 2209204).....         | 16 |
| 5. <sup>1</sup> H NMR and <sup>13</sup> C NMR spectra for spectroscopic data..... | 17 |
| 6. References and notes.....                                                      | 78 |

## 1. General information.

All compounds were fully characterized by spectroscopic data. The NMR spectra were recorded on a DRX600 ( $^1\text{H}$ : 600 MHz,  $^{13}\text{C}$ : 150 MHz), chemical shifts ( $\delta$ ) are expressed in ppm, and  $J$  values are given in Hz, and deuterated  $\text{CDCl}_3$  and  $\text{DMSO-}d_6$  were used as solvent. The reactions were monitored by thin layer chromatography (TLC) using silica gel GF<sub>254</sub>. The melting points were determined on XT-4A melting point apparatus and are uncorrected. HRMs were performed on an Agilent LC/MS TOF instrument.

All chemicals and solvents were used as received without further purification unless otherwise stated. Column chromatography was performed on silica gel (200–300 mesh).

*N,N*-Dimethyl enaminones **1** were prepared according to the literature<sup>1</sup>, iodonium ylides **2** were prepared according to the literature<sup>2</sup>. Other reagents were purchased from Energy Chemical and Adamas-beta®.

## 2. General procedure.

### 2.1 Typical procedure for the synthesis of isocoumarins **3**.

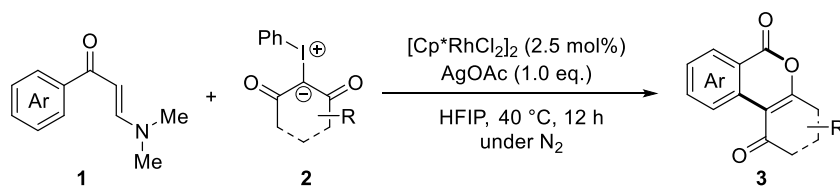

*N,N*-Dimethyl enaminones **1** (0.5 mmol), iodonium ylides **2** (0.75 mmol),  $[\text{Cp}^*\text{RhCl}_2]_2$  (2.5 mol%), AgOAc (1.0 eq.) and HFIP (1.0 mL) were charged into a 10 mL Ace Glass pressure tubes under  $\text{N}_2$ , and the mixture was stirred at 40 °C for 12.0 h until *N,N*-dimethyl enaminones were completely consumed. The mixture was cooled to room temperature, and then EtOAc (15 mL  $\times$  2) were added. The organic phase was washed with water (10 mL), dried over  $\text{Na}_2\text{SO}_4$ , concentrated and purified by flash column chromatography to afford isocoumarins **3**.

### 2.2 Gram-synthesis of isocoumarin **3a**.

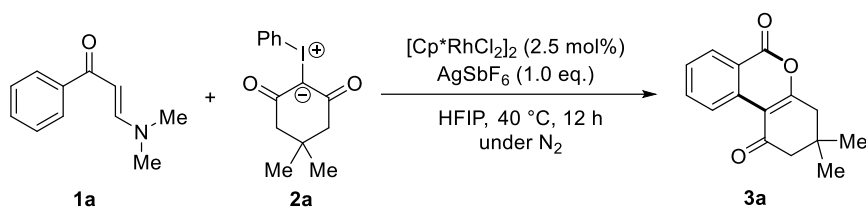

*N,N*-Dimethyl enaminones **1** (5.0 mmol), iodonium ylides **2** (7.5 mmol),  $[\text{Cp}^*\text{RhCl}_2]_2$  (2.5 mol%), AgOAc (1.0 eq.) and HFIP (10 mL) were charged into a 100 mL Ace Glass pressure tubes under  $\text{N}_2$ , and the mixture was stirred at 40 °C for 12.0 h until *N,N*-dimethyl enaminones were completely consumed. The mixture was cooled to room temperature, and then EtOAc (15 mL  $\times$  2) were added. The organic phase was washed with water (10 mL), dried over  $\text{Na}_2\text{SO}_4$ , concentrated and purified by flash column chromatography to afford isocoumarin **3a** in 90% yield (1.1 g).

### 2.3 Derivatization of isocoumarin **3a**.

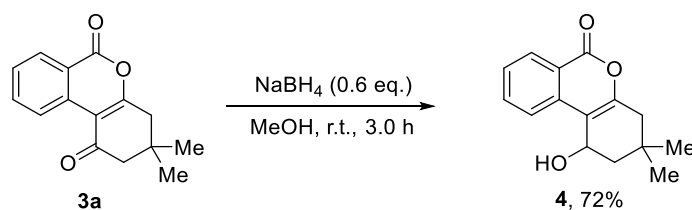

Isocoumarin **3a** (5.0 mmol),  $\text{NaBH}_4$  (0.3 mmol) and MeOH (2.0 mL) were charged into

a 10 mL Ace Glass pressure tubes, and the mixture was stirred at room temperature for 3.0 h until isocoumarin were completely consumed. The mixture was cooled to room temperature, and then EtOAc (15 mL × 2) were added. The organic phase was washed with water (10 mL), dried over Na<sub>2</sub>SO<sub>4</sub>, concentrated and purified by flash column chromatography to afford the reductive product **4** in 72% yield.

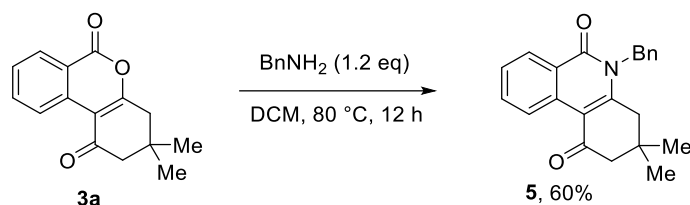

Isocoumarin **3a** (5.0 mmol), benzylamine (0.6 mmol) and DCM (2.0 mL) were charged into a 10 mL Ace Glass pressure tubes, and the mixture was stirred at 80 °C for 12.0 h until isocoumarin were completely consumed. The mixture was cooled to room temperature, and then EtOAc (15 mL × 2) were added. The organic phase was washed with water (10 mL), dried over Na<sub>2</sub>SO<sub>4</sub>, concentrated and purified by flash column chromatography to afford 2-benzyloisoquinolin-1(2H)-one **5** in 60% yield.

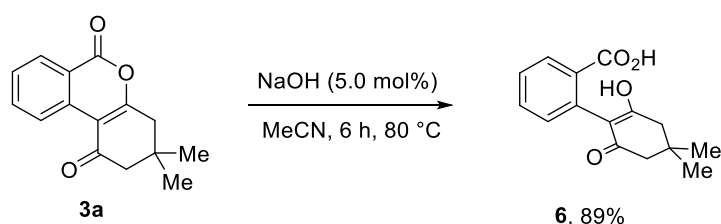

Isocoumarin **3a** (5.0 mmol), NaOH (5.0 mmol%) and MeCN (2.0 mL) were charged into a 10 mL Ace Glass pressure tubes, and the mixture was stirred at 80 °C for 6.0 h until isocoumarin were completely consumed. The mixture was cooled to room temperature, and then EtOAc (15 mL × 2) were added. The organic phase was washed with water (10 mL), dried over Na<sub>2</sub>SO<sub>4</sub>, concentrated and purified by flash column chromatography to afford the carboxylic acid product **6** in 89% yield.

## 2.4 Isotopic labeling experiments.

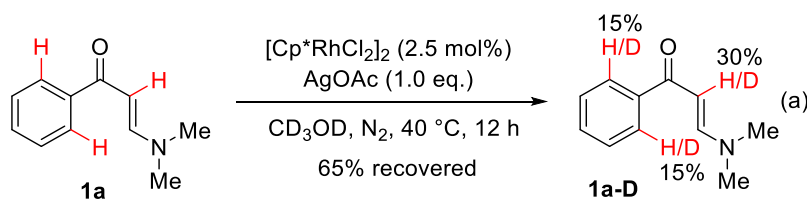

*N,N*-Dimethyl enaminone **1a** (2.0 mmol), [Cp<sup>\*</sup>RhCl<sub>2</sub>]<sub>2</sub> (2.5 mol%), AgOAc (1.0 eq.) and CD<sub>3</sub>OD (3.0 eq.) were charged into a 10 mL Ace Glass pressure tubes under N<sub>2</sub>, and

the mixture was stirred at 40 °C for 12.0 h. The mixture was cooled to room temperature, and then EtOAc (15 mL × 2) were added. The organic phase was washed with water (10 mL), dried over Na<sub>2</sub>SO<sub>4</sub>, concentrated and purified by flash column chromatography to afford **1a-D** by <sup>1</sup>H NMR identification.

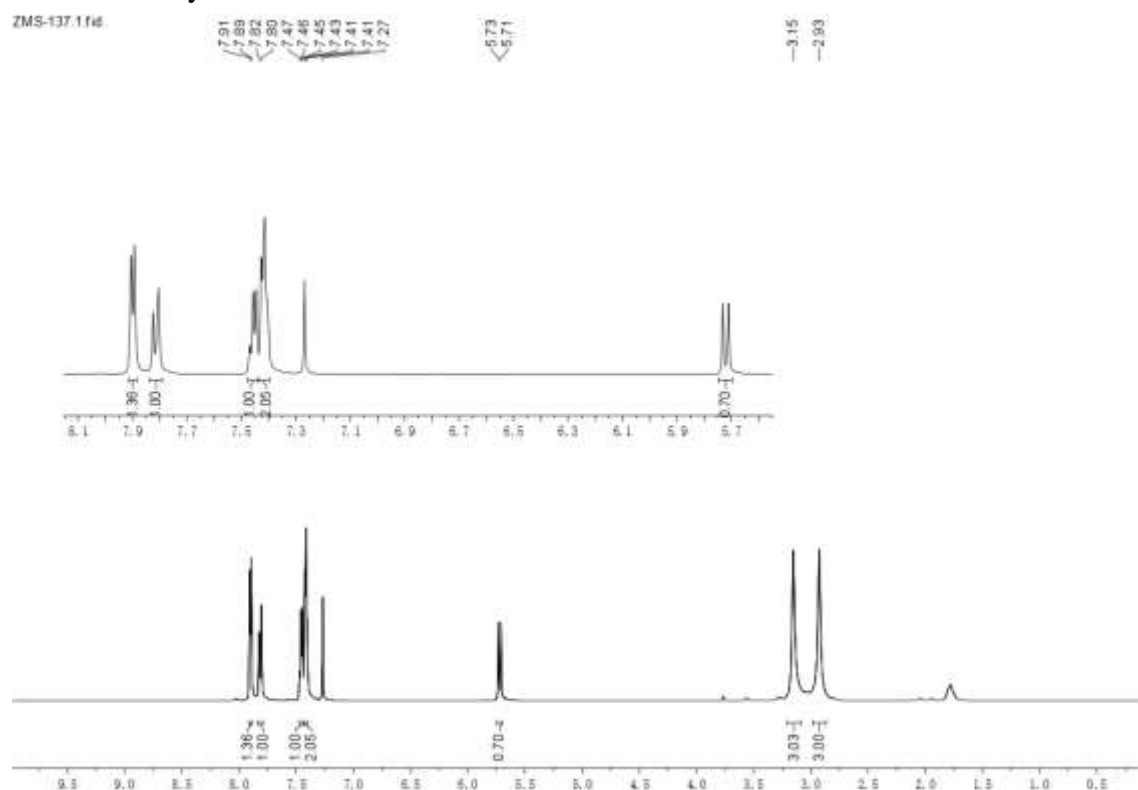

## 2.4 The mechanistic investigation.

With regard to the standard conditions, the intermediate **E** in the Scheme 4 was successfully detected by LC-HRMS during the crude reaction mixture.

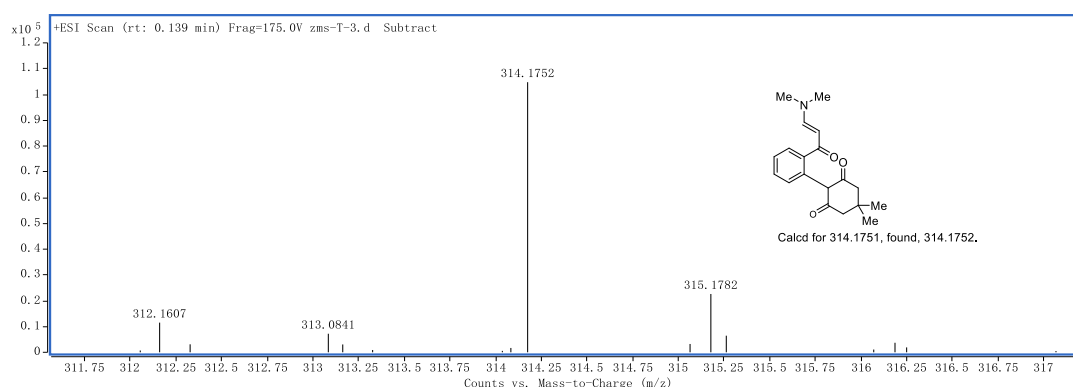

### 3. Spectroscopic data.

#### 3,3-Dimethyl-3,4-dihydro-1H-benzo[*c*]chromene-1,6(2H)-dione (3a)

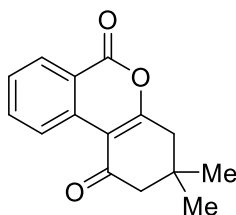

$V_{\text{Petroleum ether}}/V_{\text{Ethyl acetate}} = 12:1$ ,  $R_f = 0.2$ ; Yellow solid: 117mg (96%); mp = 143–144 °C;  $^1\text{H NMR}$  (600 MHz,  $\text{CDCl}_3$ )  $\delta = 9.04$  (d,  $J = 8.3$  Hz, 1H, ArH), 8.22 (d,  $J = 7.9$  Hz, 1H, ArH), 7.79 (t,  $J = 7.7$  Hz, 1H, ArH), 7.52 (t,  $J = 7.6$  Hz, 1H, ArH), 2.79 (s, 2H,  $\text{CH}_2$ ), 2.52 (s, 2H,  $\text{CH}_2$ ), 1.17 (s, 6H,  $\text{CH}_3$ );  $^{13}\text{C NMR}$  (150 MHz,  $\text{CDCl}_3$ )  $\delta = 197.1$ , 168.1, 160.9, 135.8, 134.0, 129.7, 128.5, 125.9, 119.8, 110.7, 53.0, 42.6, 32.1, 28.3, 28.3; HRMS (TOF ES<sup>+</sup>):  $m/z$  calcd for  $\text{C}_{15}\text{H}_{14}\text{O}_3$  [(M+H)<sup>+</sup>], 243.1016, found, 243.1008.

#### 9-Methoxy-3,3-dimethyl-3,4-dihydro-1H-benzo[*c*]chromene-1,6(2H)-dione (3b)

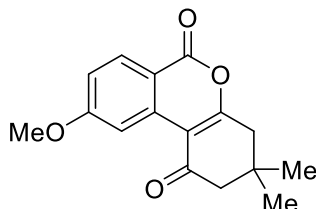

$V_{\text{Petroleum ether}}/V_{\text{Ethyl acetate}} = 8:1$ ,  $R_f = 0.2$ ; Yellow solid: 130mg (96%); mp = 127–128 °C;  $^1\text{H NMR}$  (600 MHz,  $\text{CDCl}_3$ )  $\delta = 8.58$  (s, 1H, ArH), 8.18 (d,  $J = 8.8$  Hz, 1H, ArH), 7.05–7.03 (m, 1H, ArH), 3.94 (s, 3H,  $\text{ArOCH}_3$ ), 2.78 (s, 2H,  $\text{CH}_2$ ), 2.51 (s, 2H,  $\text{CH}_2$ ), 1.17 (s, 6H,  $\text{CH}_3$ );  $^{13}\text{C NMR}$  (150 MHz,  $\text{CDCl}_3$ )  $\delta = 197.4$ , 169.1, 165.6, 160.6, 136.4, 131.8, 117.2, 112.7, 110.4, 108.0, 55.9, 53.0, 42.7, 32.1, 28.3, 28.3; HRMS (TOF ES<sup>+</sup>):  $m/z$  calcd for  $\text{C}_{16}\text{H}_{16}\text{O}_4$  [(M+H)<sup>+</sup>], 273.1121, found, 273.1122.

#### 8-Methoxy-3,3-dimethyl-3,4-dihydro-1H-benzo[*c*]chromene-1,6(2H)-dione (3c)

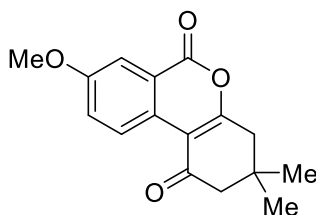

$V_{\text{Petroleum ether}}/V_{\text{Ethyl acetate}} = 12:1$ ,  $R_f = 0.2$ ; White solid: 128mg (94%); mp = 126–127 °C;  $^1\text{H NMR}$  (600 MHz,  $\text{CDCl}_3$ )  $\delta = 8.59$  (s, 1H, ArH), 8.18 (d,  $J = 8.8$  Hz, 1H, ArH), 7.07–7.03 (m, 1H, ArH), 3.95 (s, 3H,  $\text{ArOCH}_3$ ), 2.79 (s, 2H,  $\text{CH}_2$ ), 2.51 (s, 2H,  $\text{CH}_2$ ), 1.17 (s, 6H,  $\text{CH}_3$ );  $^{13}\text{C NMR}$  (150 MHz,  $\text{CDCl}_3$ )  $\delta = 197.4$ , 169.1, 165.6, 160.6, 136.4, 131.8, 117.3, 112.7, 110.5, 108.0, 55.9, 53.0, 42.8, 32.1, 28.3, 28.3; HRMS (TOF ES<sup>+</sup>):  $m/z$  calcd for  $\text{C}_{16}\text{H}_{16}\text{O}_4$  [(M+H)<sup>+</sup>], 273.1121, found, 273.1121.

#### 3,3,9-Trimethyl-3,4-dihydro-1H-benzo[*c*]chromene-1,6(2H)-dione (3d)

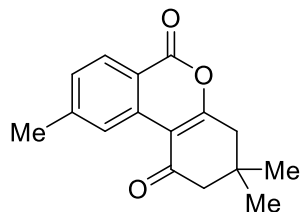

$V_{\text{Petroleum ether}}/V_{\text{Ethyl acetate}} = 12:1$ ,  $R_f = 0.2$ ; White solid: 118mg (93%); mp = 135–136 °C;  $^1\text{H NMR}$  (600 MHz,  $\text{CDCl}_3$ )  $\delta = 8.85$  (s, 1H, ArH), 8.16 (d,  $J = 8.1$  Hz, 1H, ArH), 7.34 (d,  $J = 7.9$  Hz, 1H, ArH), 2.78 (s, 2H,  $\text{CH}_2$ ), 2.51 (s, 2H,  $\text{CH}_2$ ), 2.50 (s, 3H, Ar $\text{CH}_3$ ), 1.17 (s, 6H,  $\text{CH}_3$ );  $^{13}\text{C NMR}$  (150 MHz,  $\text{CDCl}_3$ )  $\delta = 197.3$ , 168.2, 161.0, 147.2, 134.0, 129.8, 129.7, 126.0, 117.4, 110.7, 53.0, 42.7, 32.1, 28.3, 22.7, 22.7; HRMS (TOF ES $^+$ ):  $m/z$  calcd for  $\text{C}_{16}\text{H}_{16}\text{O}_3$  [(M+H) $^+$ ], 257.1172, found, 257.1176.

### 3,3,7-Trimethyl-3,4-dihydro-1H-benzo[c]chromene-1,6(2H)-dione (3e)

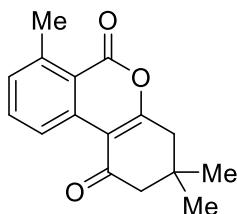

$V_{\text{Petroleum ether}}/V_{\text{Ethyl acetate}} = 12:1$ ,  $R_f = 0.2$ ; White solid: 75mg (58%); mp = 111–112 °C;  $^1\text{H NMR}$  (600 MHz,  $\text{CDCl}_3$ )  $\delta = 8.96$  (d,  $J = 8.4$  Hz, 1H, ArH), 7.64 (t,  $J = 7.9$  Hz, 1H, ArH), 7.33 (d,  $J = 7.5$  Hz, 1H, ArH), 2.80 (s, 3H, Ar $\text{CH}_3$ ), 2.77 (s, 2H,  $\text{CH}_2$ ), 2.51 (s, 2H,  $\text{CH}_2$ ), 1.17 (s, 6H,  $\text{CH}_3$ );  $^{13}\text{C NMR}$  (150 MHz,  $\text{CDCl}_3$ )  $\delta = 197.1$ , 168.1, 160.0, 143.6, 135.5, 135.0, 131.6, 123.8, 118.3, 110.7, 53.2, 42.6, 32.0, 28.3, 28.3, 24.0; HRMS (TOF ES $^+$ ):  $m/z$  calcd for  $\text{C}_{16}\text{H}_{16}\text{O}_3$  [(M+H) $^+$ ], 257.1172, found, 257.1176.

### 9-Ethyl-3,3-dimethyl-3,4-dihydro-1H-benzo[c]chromene-1,6(2H)-dione (3f)

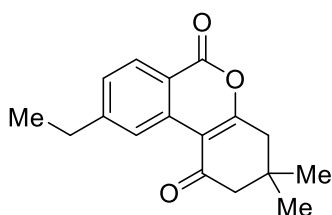

$V_{\text{Petroleum ether}}/V_{\text{Ethyl acetate}} = 12:1$ ,  $R_f = 0.2$ ; Yellow solid: 129mg (96%); mp = 108–109 °C;  $^1\text{H NMR}$  (600 MHz,  $\text{CDCl}_3$ )  $\delta = 8.89$  (s, 1H, ArH), 8.20 (d,  $J = 7.6$  Hz, 1H, ArH), 7.37 (d,  $J = 8.1$  Hz, 1H, ArH), 2.81 (d,  $J = 7.3$  Hz, 2H,  $\text{CH}_2$ ), 2.79 (s, 2H,  $\text{CH}_2$ ), 2.52 (s, 2H,  $\text{CH}_2$ ), 1.30 (t,  $J = 6.9$  Hz, 3H,  $\text{CH}_3$ ), 1.17 (s, 6H,  $\text{CH}_3$ );  $^{13}\text{C NMR}$  (150 MHz,  $\text{CDCl}_3$ )  $\delta = 197.3$ , 168.2, 161.0, 153.3, 134.1, 129.9, 128.7, 125.0, 117.5, 110.7, 53.1, 42.7, 32.1, 29.9, 28.3, 15.4, 15.4; HRMS (TOF ES $^+$ ):  $m/z$  calcd for  $\text{C}_{17}\text{H}_{18}\text{O}_3$  [(M+H) $^+$ ], 271.1329, found, 271.1332.

### 9-(Dimethylamino)-3,3-dimethyl-3,4-dihydro-1H-benzo[c]chromene-1,6(2H)-dione (3g)

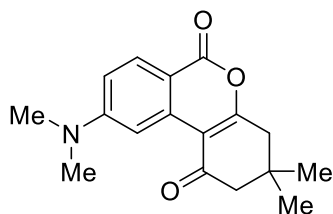

$V_{\text{Petroleum ether}}/V_{\text{Ethyl acetate}} = 8:1$ ,  $R_f = 0.2$ ; Yellow solid: 106mg (74%); mp = 168–169 °C;  $^1\text{H NMR}$  (600 MHz,  $\text{CDCl}_3$ )  $\delta = 8.28$  (s, 1H, ArH), 8.08 (d,  $J = 9.0$  Hz, 1H, ArH), 6.80 (dd,  $J = 9.0, 2.2$  Hz, 1H, ArH), 3.13 (s, 6H,  $\text{CH}_3$ ), 2.75 (s, 2H,  $\text{CH}_2$ ), 2.49 (s, 2H,  $\text{CH}_2$ ), 1.15 (s, 6H,  $\text{CH}_3$ );  $^{13}\text{C NMR}$  (150 MHz,  $\text{CDCl}_3$ )  $\delta = 197.8, 169.0, 161.1, 155.0, 135.4, 131.6, 112.4, 110.6, 107.1, 105.9, 53.2, 42.9, 40.3, 40.3, 32.0, 28.3, 28.3$ ; HRMS (TOF ES<sup>+</sup>): m/z calcd for  $\text{C}_{17}\text{H}_{19}\text{NO}_3$  [(M+H)<sup>+</sup>], 286.1438, found, 286.1440.

### 9-Chloro-3,3-dimethyl-3,4-dihydro-1H-benzo[c]chromene-1,6(2H)-dione (3h)

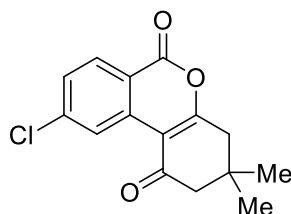

$V_{\text{Petroleum ether}}/V_{\text{Ethyl acetate}} = 12:1$ ,  $R_f = 0.2$ ; White solid: 122mg (88%); mp = 159–160 °C;  $^1\text{H NMR}$  (600 MHz,  $\text{CDCl}_3$ )  $\delta = 9.10$  (s, 1H, ArH), 8.20 (d,  $J = 8.5$  Hz, 1H, ArH), 7.48 (d,  $J = 8.4$  Hz, 1H, ArH), 2.80 (s, 2H,  $\text{CH}_2$ ), 2.52 (s, 2H,  $\text{CH}_2$ ), 1.17 (s, 6H,  $\text{CH}_3$ );  $^{13}\text{C NMR}$  (150 MHz,  $\text{CDCl}_3$ )  $\delta = 196.7, 169.2, 160.1, 142.9, 135.2, 131.2, 129.1, 125.9, 118.2, 109.9, 52.8, 42.7, 32.1, 28.3, 28.3$ ; HRMS (TOF ES<sup>+</sup>): m/z calcd for  $\text{C}_{15}\text{H}_{13}\text{ClO}_3$  [(M+H)<sup>+</sup>], 277.0626, found, 277.0628.

### 9-Fluoro-3,3-dimethyl-3,4-dihydro-1H-benzo[c]chromene-1,6(2H)-dione (3i)

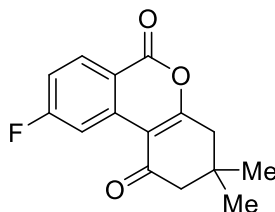

$V_{\text{Petroleum ether}}/V_{\text{Ethyl acetate}} = 10:1$ ,  $R_f = 0.2$ ; Yellow solid: 120mg (92%); mp = 119–120 °C;  $^1\text{H NMR}$  (600 MHz,  $\text{CDCl}_3$ )  $\delta = 8.79$  (d,  $J = 10.9$  Hz, 1H, ArH), 8.30 (t,  $J = 6$  Hz, 1H, ArH), 7.22 (t,  $J = 7.5$  Hz, 1H, ArH), 2.80 (s, 2H,  $\text{CH}_2$ ), 2.52 (s, 2H,  $\text{CH}_2$ ), 1.18 (s, 6H,  $\text{CH}_3$ );  $^{13}\text{C NMR}$  (150 MHz,  $\text{CDCl}_3$ )  $\delta = 196.8, 169.3, 167.4$  (C–F,  $J = 256.1$  Hz), 159.9, 136.9 (C–F,  $J = 12.2$  Hz), 132.8 (C–F,  $J = 10.5$  Hz), 116.8 (C–F,  $J = 23.6$  Hz), 116.3 (C–F,  $J = 2.3$  Hz), 112.6 (C–F,  $J = 26.1$  Hz), 110.1 (C–F,  $J = 3$  Hz), 52.8, 42.6, 32.1, 28.3, 28.3; HRMS (TOF ES<sup>+</sup>): m/z calcd for  $\text{C}_{15}\text{H}_{13}\text{FO}_3$  [(M+H)<sup>+</sup>], 261.0921, found, 261.0924.

### 9-Bromo-3,3-dimethyl-3,4-dihydro-1H-benzo[c]chromene-1,6(2H)-dione (3j)



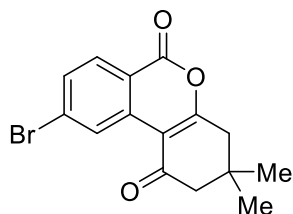

$V_{\text{Petroleum ether}}/V_{\text{Ethyl acetate}} = 12:1$ ,  $R_f = 0.2$ ; White solid: 148mg (92%); mp = 149–150 °C;  $^1\text{H NMR}$  (600 MHz,  $\text{CDCl}_3$ )  $\delta = 9.28$  (s, 1H, ArH), 8.11 (d,  $J = 8.4$  Hz, 1H, ArH), 7.67–7.63 (m, 1H, ArH), 2.80 (s, 2H,  $\text{CH}_2$ ), 2.52 (s, 2H,  $\text{CH}_2$ ), 1.17 (s, 6H,  $\text{CH}_3$ );  $^{13}\text{C NMR}$  (150 MHz,  $\text{CDCl}_3$ )  $\delta = 196.7$ , 169.2, 160.3, 135.2, 132.0, 131.9, 131.1, 128.9, 118.5, 109.8, 52.8, 42.7, 32.1, 28.3, 28.3; HRMS (TOF ES<sup>+</sup>):  $m/z$  calcd for  $\text{C}_{15}\text{H}_{13}\text{BrO}_3$  [(M+H)<sup>+</sup>], 321.0121, found, 321.0123.

### 3,3-Dimethyl-1,6-dioxo-2,3,4,6-tetrahydro-1H-benzo[c]chromen-9-yl acetate (3k)

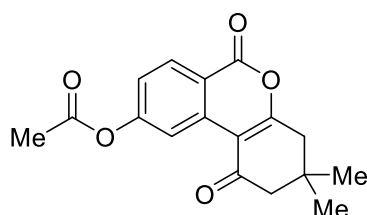

$V_{\text{Petroleum ether}}/V_{\text{Ethyl acetate}} = 4:1$ ,  $R_f = 0.2$ ; Yellow solid: 112mg (74%); mp = 229–230 °C;  $^1\text{H NMR}$  (600 MHz,  $\text{CDCl}_3$ )  $\delta = 8.58$  (s, 1H, ArH), 8.17 (d,  $J = 8.8$  Hz, 1H, ArH), 7.04 (dd,  $J = 8.9$ , 2.6 Hz, 1H, ArH), 3.94 (s, 3H,  $\text{CH}_3$ ), 2.78 (s, 2H,  $\text{CH}_2$ ), 2.51 (s, 2H,  $\text{CH}_2$ ), 1.17 (s, 6H,  $\text{CH}_3$ );  $^{13}\text{C NMR}$  (150 MHz,  $\text{CDCl}_3$ )  $\delta = 197.4$ , 169.1, 165.6, 160.6, 136.4, 131.8, 117.2, 117.2, 112.7, 110.4, 108.0, 55.9, 53.0, 42.7, 32.1, 28.2, 28.2; HRMS (TOF ES<sup>+</sup>):  $m/z$  calcd for  $\text{C}_{17}\text{H}_{16}\text{O}_5$  [(M+H)<sup>+</sup>], 301.1071, found, 301.1075.

### 3,3-Dimethyl-9-nitro-3,4-dihydro-1H-benzo[c]chromene-1,6(2H)-dione (3l)

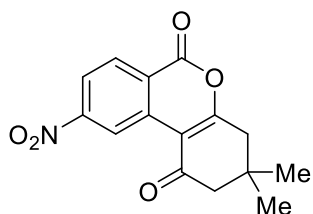

$V_{\text{Petroleum ether}}/V_{\text{Ethyl acetate}} = 12:1$ ,  $R_f = 0.2$ ; White solid: 125mg (87%); mp = 170–171 °C;  $^1\text{H NMR}$  (600 MHz,  $\text{CDCl}_3$ )  $\delta = 9.94$  (s, 1H, ArH), 8.45 (d,  $J = 8.7$  Hz, 1H, ArH), 8.30–8.28 (m, 1H, ArH), 2.85 (s, 2H,  $\text{CH}_2$ ), 2.57 (s, 2H,  $\text{CH}_2$ ), 1.20 (s, 6H,  $\text{CH}_3$ );  $^{13}\text{C NMR}$  (150 MHz,  $\text{CDCl}_3$ )  $\delta = 196.3$ , 169.8, 159.2, 152.3, 135.3, 131.4, 123.9, 122.6, 121.6, 109.8, 52.6, 42.6, 32.2, 28.3, 28.3; HRMS (TOF ES<sup>+</sup>):  $m/z$  calcd for  $\text{C}_{15}\text{H}_{13}\text{NO}_5$  [(M+H)<sup>+</sup>], 288.0866, found, 288.0870.

### 3,3-Dimethyl-9-(trifluoromethyl)-3,4-dihydro-1H-benzo[c]chromene-1,6(2H)-dione (3m)

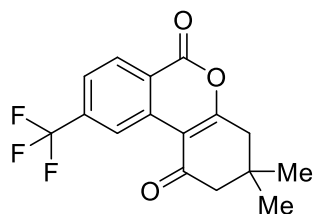

$V_{\text{Petroleum ether}}/V_{\text{Ethyl acetate}} = 12:1$ ,  $R_f = 0.2$ ; Yellow solid: 125mg (84%); mp = 168–169 °C;  $^1\text{H NMR}$  (600 MHz,  $\text{CDCl}_3$ )  $\delta = 9.42$  (s, 1H, ArH), 8.40 (d,  $J = 8.3$  Hz, 1H, ArH), 7.76 (d,  $J = 8.2$  Hz, 1H, ArH), 2.83 (s, 2H  $\text{CH}_2$ ), 2.55 (s, 2H,  $\text{CH}_2$ ), 1.19 (s, 6H,  $\text{CH}_3$ );  $^{13}\text{C NMR}$  (150 MHz,  $\text{CDCl}_3$ )  $\delta = 196.7$ , 169.2, 159.8, 137.0 ( $J = 32.7$  Hz), 134.5, 130.5, 124.9 ( $J = 3.4$  Hz), 123.5 ( $J = 3.9$  Hz), 122.6, 122.3, 110.0, 52.8, 42.6, 32.1, 28.3, 28.3; HRMS (TOF ES<sup>+</sup>):  $m/z$  calcd for  $\text{C}_{16}\text{H}_{13}\text{F}_3\text{O}_3$  [(M+H)<sup>+</sup>], 311.0890, found, 311.0888.

### 3,3-Dimethyl-9-(methylsulfonyl)-3,4-dihydro-1H-benzo[c]chromene-1,6(2H)-dione (3n)

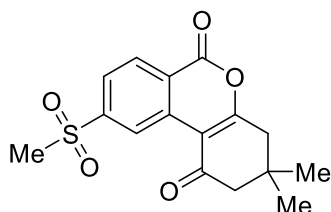

$V_{\text{Petroleum ether}}/V_{\text{Ethyl acetate}} = 4:1$ ,  $R_f = 0.2$ ; White solid: 147 mg (91%); mp = 244–245 °C;  $^1\text{H NMR}$  (600 MHz,  $\text{CDCl}_3$ )  $\delta = 9.69$  (s, 1H, ArH), 8.47 (d,  $J = 8.3$  Hz, 1H, ArH), 8.09–8.06 (m, 1H, ArH), 3.16 (s, 3H, Me), 2.85 (s, 2H,  $\text{CH}_2$ ), 2.57 (s, 2H,  $\text{CH}_2$ ), 1.20 (s, 6H,  $\text{CH}_3$ );  $^{13}\text{C NMR}$  (150 MHz,  $\text{CDCl}_3$ )  $\delta = 196.3$ , 169.5, 159.3, 146.8, 134.8, 131.0, 126.1, 125.5, 123.3, 109.8, 52.5, 44.0, 42.5, 32.1, 28.1, 28.1; HRMS (TOF ES<sup>+</sup>):  $m/z$  calcd for  $\text{C}_{16}\text{H}_{16}\text{O}_5\text{S}$  [(M+H)<sup>+</sup>], 321.0791, found, 321.0799.

### 3,3-Dimethyl-3,4-dihydro-1H-[1,3]dioxolo[4',5':4,5]benzo[1,2-c]chromene-1,6(2H)-dione (3o)

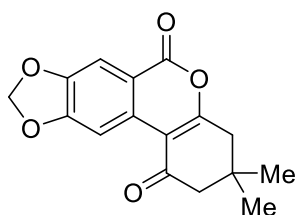

$V_{\text{Petroleum ether}}/V_{\text{Ethyl acetate}} = 5:1$ ,  $R_f = 0.2$ ; Yellow solid: 109mg (76%); mp = 164–165 °C;  $^1\text{H NMR}$  (600 MHz,  $\text{CDCl}_3$ )  $\delta = 8.16$  (d,  $J = 8.7$  Hz, 1H, ArH), 7.18 (d,  $J = 8.7$  Hz, 1H, ArH), 6.18 (s, 2H, ,  $\text{CH}_2$ ), 3.13 (s, 2H,  $\text{CH}_2$ ), 2.65 (s, 2H,  $\text{CH}_2$ ), 1.19 (s, 6H, Me);  $^{13}\text{C NMR}$  (150 MHz,  $\text{CDCl}_3$ )  $\delta = 195.9$ , 168.6, 151.4, 144.4, 142.4, 121.5, 120.4, 120.1, 119.2, 110.2, 101.9, 52.4, 39.5, 34.0, 29.0, 29.0; HRMS (TOF ES<sup>+</sup>):  $m/z$  calcd for  $\text{C}_{16}\text{H}_{14}\text{O}_5$  [(M+H)<sup>+</sup>], 287.0914, found, 287.0916.

### 3,3-Dimethyl-3,4-dihydro-1H-naphtho[2,3-c]chromene-1,6(2H)-dione (3p)

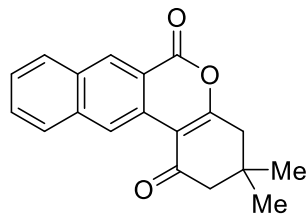

$V_{\text{Petroleum ether}}/V_{\text{Ethyl acetate}} = 8:1$ ,  $R_f = 0.2$ ; Yellow solid: 124mg (85%); mp = 188–189 °C;  $^1\text{H NMR}$  (600 MHz,  $\text{CDCl}_3$ )  $\delta = 9.53$  (s, 1H, ArH), 8.91 (s, 1H, ArH), 8.01 (dd,  $J = 17.0, 8.3$  Hz, 2H, ArH), 7.66 (t,  $J = 7.5$  Hz, 1H, ArH), 7.58 (t,  $J = 7.5$  Hz, 1H, ArH), 2.82 (s, 2H,  $\text{CH}_2$ ), 2.57 (s, 2H,  $\text{CH}_2$ ), 1.21 (s, 6H,  $\text{CH}_3$ );  $^{13}\text{C NMR}$  (150 MHz,  $\text{CDCl}_3$ )  $\delta = 197.5, 167.0, 161.2, 137.0, 132.2, 131.9, 129.7, 129.4, 129.2, 127.9, 127.4, 125.5, 118.1, 110.7, 53.0, 42.7, 32.1, 28.3, 28.3$ ; HRMS (TOF ES<sup>+</sup>): m/z calcd for  $\text{C}_{19}\text{H}_{16}\text{O}_3$  [(M+H)<sup>+</sup>], 293.1172, found, 293.1174.

### 3,3-Dimethyl-9-phenyl-3,4-dihydro-1H-benzo[c]chromene-1,6(2H)-dione (3q)

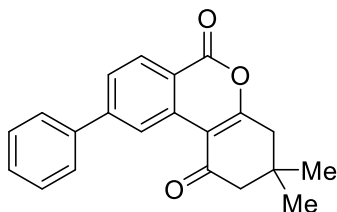

$V_{\text{Petroleum ether}}/V_{\text{Ethyl acetate}} = 12:1$ ,  $R_f = 0.2$ ; Yellow solid: 144mg (91%); mp = 153–154 °C;  $^1\text{H NMR}$  (600 MHz,  $\text{CDCl}_3$ )  $\delta = 9.34$  (s, 1H, ArH), 8.34 (d,  $J = 8.3$  Hz, 1H, ArH), 7.77 (d,  $J = 9.6$  Hz, 1H, ArH), 7.72 (d,  $J = 7.3$  Hz, 2H, ArH), 7.50 (t,  $J = 7.5$  Hz, 2H, ArH), 7.43 (t,  $J = 7.3$  Hz, 1H, ArH), 2.81 (s, 2H,  $\text{CH}_2$ ), 2.54 (s, 2H,  $\text{CH}_2$ ), 1.19 (s, 6H,  $\text{CH}_3$ );  $^{13}\text{C NMR}$  (150 MHz,  $\text{CDCl}_3$ )  $\delta = 197.2, 168.5, 160.8, 148.4, 139.7, 134.4, 130.3, 129.2, 129.2, 128.9, 127.8, 127.8, 127.3, 124.3, 118.5, 110.7, 53.0, 42.7, 32.1, 28.3, 28.3$ ; HRMS (TOF ES<sup>+</sup>): m/z calcd for  $\text{C}_{21}\text{H}_{18}\text{O}_3$  [(M+H)<sup>+</sup>], 319.1329, found, 319.1328.

### 3,3-Dimethyl-9-(piperazin-1-yl)-3,4-dihydro-1H-benzo[c]chromene-1,6(2H)-dione (3r)

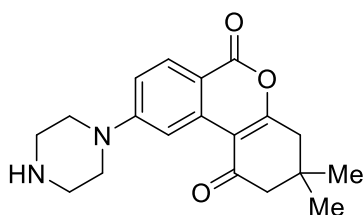

$V_{\text{Petroleum ether}}/V_{\text{Ethyl acetate}} = 3:1$ ,  $R_f = 0.2$ ; Yellow solid: 128mg (79%); mp = 176–177 °C;  $^1\text{H NMR}$  (600 MHz,  $\text{CDCl}_3$ )  $\delta = 8.57$  (s, 1H, ArH), 8.16–8.13 (m, H, ArH), 7.02 (dd,  $J = 9.1, 2.5$  Hz, 1H, ArH), 3.72 (t,  $J = 5.2$  Hz, 2H,  $\text{CH}_2$ ), 3.58–3.54 (m, 2H,  $\text{CH}_2$ ), 3.54–3.50 (m, 2H,  $\text{CH}_2$ ), 3.48 (t,  $J = 5.4$  Hz, 2H,  $\text{CH}_2$ ), 2.77 (s, 2H,  $\text{CH}_2$ ), 2.50 (s, 2H,  $\text{CH}_2$ ), 1.16 (s, 6H,  $\text{CH}_3$ );  $^{13}\text{C NMR}$  (150 MHz,  $\text{CDCl}_3$ )  $\delta = 197.8, 169.4, 161.0, 160.5, 155.2, 135.8, 131.7, 115.2, 110.4, 109.3, 53.1, 48.2, 47.1, 45.1, 42.9, 39.8, 32.1, 28.2, 28.2$ ; HRMS (TOF ES<sup>+</sup>): m/z calcd for  $\text{C}_{19}\text{H}_{22}\text{N}_2\text{O}_3$  [(M+H)<sup>+</sup>], 327.1703, found, 327.1707.

### 9-(Dimethylamino)-3,3-dimethyl-3,4-dihydro-1H-benzo[c]chromene-1,6(2H)-dione (3s)

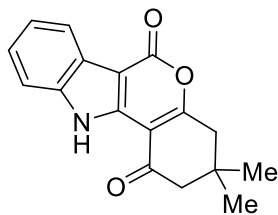

$V_{\text{Petroleum ether}}/V_{\text{Ethyl acetate}} = 4:1$ ,  $R_f = 0.2$ ; White solid: 73mg (50%); mp = 223–224 °C;  $^1\text{H NMR}$  (600 MHz,  $\text{CDCl}_3$ )  $\delta = 10.26$  (s, 1H, NH), 8.15 (d,  $J = 7.7$  Hz, 1H, ArH), 7.52 (d,  $J = 7.9$  Hz, 1H, ArH), 7.42–7.34 (m, 2H, ArH), 2.86 (s, 2H,  $\text{CH}_2$ ), 2.55 (s, 2H,  $\text{CH}_2$ ), 1.21 (s, 6H,  $\text{CH}_3$ );  $^{13}\text{C NMR}$  (150 MHz,  $\text{CDCl}_3$ )  $\delta = 197.2, 172.4, 157.8, 141.9, 137.1, 125.3, 123.6, 123.2, 121.2, 112.0, 106.4, 99.4, 50.9, 42.0, 33.3, 28.5, 28.5$ ; HRMS (TOF ES<sup>+</sup>):  $m/z$  calcd for  $\text{C}_{17}\text{H}_{15}\text{NO}_3$  [(M+H)<sup>+</sup>], 282.1125, found, 282.1131.

**7,7-Dimethyl-7,8-dihydro-4H-thieno[2,3-c]chromene-4,9(6H)-dione (3t)**

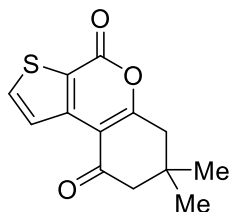

$V_{\text{Petroleum ether}}/V_{\text{Ethyl acetate}} = 10:1$ ,  $R_f = 0.2$ ; White solid: 107mg (87%); mp = 128–129 °C;  $^1\text{H NMR}$  (600 MHz,  $\text{CDCl}_3$ )  $\delta = 8.22$  (d,  $J = 5.2$  Hz, 1H, C=CH), 7.91 (d,  $J = 5.2$  Hz, 1H, C=CH), 2.82 (s, 2H,  $\text{CH}_2$ ), 2.50 (s, 2H,  $\text{CH}_2$ ), 1.18 (s, 6H,  $\text{CH}_3$ );  $^{13}\text{C NMR}$  (150 MHz,  $\text{CDCl}_3$ )  $\delta = 195.3, 169.5, 157.0, 143.6, 138.0, 126.2, 123.0, 111.6, 51.6, 41.9, 32.6, 28.4, 28.4$ ; HRMS (TOF ES<sup>+</sup>):  $m/z$  calcd for  $\text{C}_{13}\text{H}_{12}\text{O}_3\text{S}$  [(M+H)<sup>+</sup>], 249.0580, found, 249.0581.

**7,7-Dimethyl-7,8-dihydro-4H-furo[2,3-c]chromene-4,9(6H)-dione (3u)**

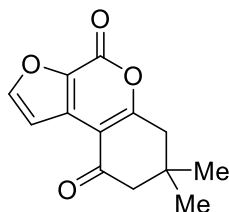

$V_{\text{Petroleum ether}}/V_{\text{Ethyl acetate}} = 10:1$ ,  $R_f = 0.2$ ; Yellow solid: 89mg (77%); mp = 145–146 °C;  $^1\text{H NMR}$  (600 MHz,  $\text{CDCl}_3$ )  $\delta = 7.86$  (s, 1H, C=CH), 7.37 (d,  $J = 1.9$  Hz, 1H, C=CH), 2.79 (s, 2H,  $\text{CH}_2$ ), 2.48 (s, 2H,  $\text{CH}_2$ ), 1.17 (s, 6H,  $\text{CH}_3$ );  $^{13}\text{C NMR}$  (150 MHz,  $\text{CDCl}_3$ )  $\delta = 195.3, 169.2, 152.2, 151.5, 136.9, 132.6, 110.3, 109.3, 51.1, 41.7, 33.0, 28.4, 28.4$ ; HRMS (TOF ES<sup>+</sup>):  $m/z$  calcd for  $\text{C}_{13}\text{H}_{12}\text{O}_4$  [(M+Na)<sup>+</sup>], 255.0628, found, 255.0628.

**3-Methyl-3,4-dihydro-1H-benzo[*c*]chromene-1,6(2H)-dione (3x)**

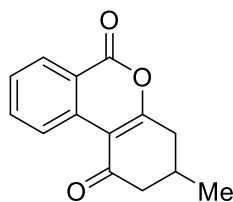

$V_{\text{Petroleum ether}}/V_{\text{Ethyl acetate}} = 12:1$ ,  $R_f = 0.2$ ; White solid: 108mg (95%); mp = 123–124 °C;  $^1\text{H NMR}$  (600 MHz,  $\text{CDCl}_3$ )  $\delta = 9.05$  (d,  $J = 8.3$  Hz, 1H, ArH), 8.28 (dd,  $J = 8.0, 1.5$  Hz, 1H, ArH), 7.81–7.76 (m, 1H, ArH), 7.53 (t,  $J = 7.5$  Hz, 1H, ArH), 2.97–2.91 (m, 1H, C-CH), 2.74–2.63 (m, 2H,  $\text{CH}_2$ ), 2.48–2.34 (m, 2H,  $\text{CH}_2$ ), 1.18 (d,  $J = 6.4$  Hz, 3H,  $\text{CH}_3$ );  $^{13}\text{C NMR}$  (150 MHz,  $\text{CDCl}_3$ )  $\delta = 197.1, 169.1, 160.7, 135.8, 134.1, 129.7, 128.6, 126.0, 119.9, 111.3, 47.3, 37.0, 27.8, 20.9$ ; HRMS (TOF ES+): m/z calcd for  $\text{C}_{14}\text{H}_{14}\text{O}_3$  [(M+H)<sup>+</sup>], 229.0859, found, 229.0863.

### 2,2-Dimethyl-3,4-dihydro-1H-benzo[c]chromene-1,6(2H)-dione (3y)

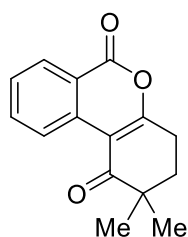

$V_{\text{Petroleum ether}}/V_{\text{Ethyl acetate}} = 12:1$ ,  $R_f = 0.2$ ; White solid: 115mg (95%); mp = 142–143 °C;  $^1\text{H NMR}$  (600 MHz,  $\text{CDCl}_3$ )  $\delta = 9.04$  (d,  $J = 8.3$  Hz, 1H, ArH), 8.28 (d,  $J = 7.9$  Hz, 1H, ArH), 7.79 (t,  $J = 7.7$  Hz, 1H, ArH), 7.53 (t,  $J = 7.6$  Hz, 1H, ArH), 2.80 (s, 2H,  $\text{CH}_2$ ), 2.52 (s, 2H,  $\text{CH}_2$ ), 1.17 (s, 6H,  $\text{CH}_3$ );  $^{13}\text{C NMR}$  (150 MHz,  $\text{CDCl}_3$ )  $\delta = 197.2, 168.1, 160.9, 135.8, 134.0, 129.7, 128.5, 125.9, 119.9, 110.7, 53.0, 42.6, 32.1, 28.3, 28.3$ ; HRMS (TOF ES+): m/z calcd for  $\text{C}_{14}\text{H}_{14}\text{O}_3$  [(M+H)<sup>+</sup>], 243.1016, found, 243.1022.

### 3-Phenyl-3,4-dihydro-1H-benzo[c]chromene-1,6(2H)-dione (3z)

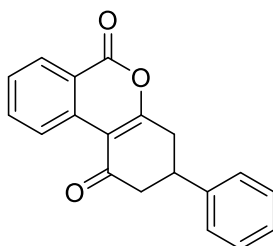

$V_{\text{Petroleum ether}}/V_{\text{Ethyl acetate}} = 10:1$ ,  $R_f = 0.2$ ; Yellow solid: 124mg (78%); mp = 118–119 °C;  $^1\text{H NMR}$  (600 MHz,  $\text{CDCl}_3$ )  $\delta = 9.10$  (d,  $J = 8.3$  Hz, 1H, ArH), 8.31 (d,  $J = 7.9$  Hz, 1H, ArH), 7.82 (t,  $J = 7.7$  Hz, 1H, ArH), 7.56 (t,  $J = 7.6$  Hz, 1H, ArH), 7.40 (t,  $J = 7.5$  Hz, 2H, ArH), 7.31 (dd,  $J = 12.5, 7.4$  Hz, 3H, ArH), 3.61–3.54 (m, 1H, C-CH), 3.23–3.12 (m, 2H,  $\text{CH}_2$ ), 2.98–2.87 (m, 2H,  $\text{CH}_2$ );  $^{13}\text{C NMR}$  (150 MHz,  $\text{CDCl}_3$ )  $\delta = 196.3, 168.7, 160.6, 141.5, 135.9, 133.9, 129.8, 129.2, 129.2, 128.8, 127.7, 126.7, 126.7, 126.1, 119.9, 111.5, 46.0, 38.1, 36.5$ ; HRMS (TOF ES+): m/z calcd for  $\text{C}_{19}\text{H}_{14}\text{O}_3$  [(M+H)<sup>+</sup>], 291.1016, found, 291.1019.

### 3,4-Dihydro-1H-benzo[c]chromene-1,6(2H)-dione (3a')

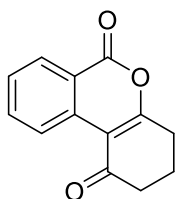

$V_{\text{Petroleum ether}}/V_{\text{Ethyl acetate}} = 12:1$ ,  $R_f = 0.2$ ; Yellow solid: 101mg (95%); mp = 165–166 °C;  $^1\text{H NMR}$  (600 MHz,  $\text{CDCl}_3$ )  $\delta = 9.04$  (d,  $J = 8.3$  Hz, 1H, ArH), 8.27 (d,  $J = 7.6$  Hz, 1H, ArH), 7.80–7.77 (m, 1H, ArH), 7.52 (t,  $J = 7.6$  Hz, 1H, ArH), 2.93 (t,  $J = 6.3$  Hz, 2H,  $\text{CH}_2$ ), 2.65 (t,  $J = 6.5$  Hz, 2H,  $\text{CH}_2$ ), 2.20–2.15 (m, 2H,  $\text{CH}_2$ );  $^{13}\text{C NMR}$  (150 MHz,  $\text{CDCl}_3$ )  $\delta = 197.1, 169.6, 160.6, 135.8, 134.1, 129.7, 128.5, 126.2, 119.9, 111.7, 39.1, 29.1, 20.1$ ; HRMS (TOF ES+): m/z calcd for  $\text{C}_{13}\text{H}_{10}\text{O}_3$  [(M+H)<sup>+</sup>], 215.0703, found, 215.0705.

### 2,4-Dimethyl-1*H*-isochromeno[3,4-*d*]pyrimidine-1,3,6(2*H*,4*H*)-trione (3b')

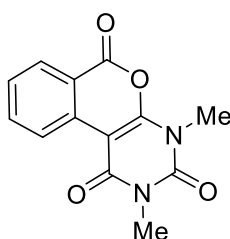

$V_{\text{Petroleum ether}}/V_{\text{Ethyl acetate}} = 2:1$ ,  $R_f = 0.2$ ; Yellow solid: 82mg (63%); mp = 180–181 °C;  $^1\text{H NMR}$  (600 MHz,  $\text{CDCl}_3$ )  $\delta = 7.88$  (d,  $J = 7.0$  Hz, 1H, ArH), 7.72 (s, 1H, ArH), 7.53–7.45 (m, 1H, ArH), 7.18 (d,  $J = 7.3$  Hz, 1H, ArH), 3.42 (s, 3H,  $\text{CH}_3$ ), 2.98 (s, 3H,  $\text{CH}_3$ );  $^{13}\text{C NMR}$  (150 MHz,  $\text{CDCl}_3$ )  $\delta = 190.6, 169.1, 151.6, 148.3, 144.2, 138.2, 133.0, 130.4, 125.0, 120.9, 102.9, 30.0, 30.0$ ; HRMS (TOF ES+): m/z calcd for  $\text{C}_{19}\text{H}_{14}\text{O}_3$  [(M+H)<sup>+</sup>], 259.0713, found, 259.0713.

### 2,3-Dihydrocyclopenta[*c*]isochromene-1,5-dione (3c')

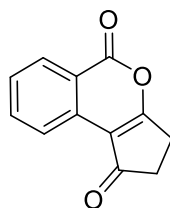

$V_{\text{Petroleum ether}}/V_{\text{Ethyl acetate}} = 10:1$ ,  $R_f = 0.2$ ; White solid: 93mg (93%); mp = 181–182 °C;  $^1\text{H NMR}$  (600 MHz,  $\text{CDCl}_3$ )  $\delta = 8.49$  (d,  $J = 7.9$  Hz, 1H, ArH), 8.27 (d,  $J = 7.9$  Hz, 1H, ArH), 7.81 (t,  $J = 7.6$  Hz, 1H, ArH), 7.57 (t,  $J = 7.7$  Hz, 1H, ArH), 3.05–3.01 (m, 2H,  $\text{CH}_2$ ), 2.77–2.74 (m, 2H,  $\text{CH}_2$ );  $^{13}\text{C NMR}$  (150 MHz,  $\text{CDCl}_3$ )  $\delta = 200.6, 180.6, 161.3, 136.0, 132.0, 130.6, 129.2, 123.4, 118.7, 114.7, 34.7, 25.9$ ; HRMS (TOF ES+): m/z calcd for  $\text{C}_{12}\text{H}_8\text{O}_3$  [(M+H)<sup>+</sup>], 201.0546, found, 201.5055.

### 1-Hydroxy-3,3-dimethyl-1,2,3,4-tetrahydro-6*H*-benzo[*c*]chromen-6-one (4)

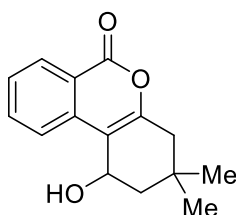

$V_{\text{Petroleum ether}}/V_{\text{Ethyl acetate}} = 4:1$ ,  $R_f = 0.2$ ; White solid: 87mg (71%); mp = 100–101 °C;  $^1\text{H NMR}$  (600 MHz,  $\text{CDCl}_3$ )  $\delta = 8.26$  (d,  $J = 7.9$  Hz, 1H, ArH), 7.92 (d,  $J = 8.1$  Hz, 1H, ArH), 7.74 (t,  $J = 7.7$  Hz, 1H, ArH), 7.46 (t,  $J = 7.6$  Hz, 1H, ArH), 5.04 (s, 1H, OH), 2.48 (d,  $J = 17.6$  Hz, 1H,  $\text{CH}_2$ ), 2.35 (d,  $J = 17.6$  Hz, 1H,  $\text{CH}_2$ ), 2.03 (dd,  $J = 13.8, 5.8$  Hz, 1H, C-CH), 1.82–1.73 (m, 2H,  $\text{CH}_2$ ), 1.19 (s, 3H,  $\text{CH}_3$ ), 1.05 (s, 3H,  $\text{CH}_3$ );  $^{13}\text{C NMR}$  (150 MHz,  $\text{CDCl}_3$ )  $\delta = 162.7, 153.8, 136.8, 134.9, 129.8, 127.7, 124.0, 120.8, 110.9, 65.0, 45.6, 41.5, 30.6, 29.3, 28.5$ ; HRMS (TOF ES+): m/z calcd for  $\text{C}_{15}\text{H}_{16}\text{O}_3$  [(M+H)<sup>+</sup>], 245.1172, found, 245.1171.

**5-Benzyl-3,3-dimethyl-3,4-dihydrophenanthridine-1,6(2H,5H)-dione (5)**

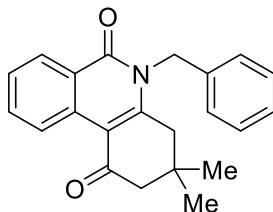

$V_{\text{Petroleum ether}}/V_{\text{Ethyl acetate}} = 4:1$ ,  $R_f = 0.2$ ; White solid: 132mg (80%); mp = 125–126 °C;  $^1\text{H NMR}$  (600 MHz,  $\text{CDCl}_3$ )  $\delta = 9.29$  (d,  $J = 8.47$  Hz, 1H, ArH), 8.48 (d,  $J = 7.9$  Hz, 1H, ArH), 7.77 (t,  $J = 7.7$  Hz, 1H, ArH), 7.53 (t,  $J = 7.6$  Hz, 1H, ArH), 7.33 (t,  $J = 7.4$  Hz, 2H, ArH), 7.28 (s, 1H, ArH), 7.12 (d,  $J = 7.9$  Hz, 2H, ArH), 5.52 (s, 2H,  $\text{CH}_2$ ), 2.82 (s, 2H,  $\text{CH}_2$ ), 2.48 (s, 2H,  $\text{CH}_2$ ), 1.01 (s, 6H,  $\text{CH}_3$ );  $^{13}\text{C NMR}$  (150 MHz,  $\text{CDCl}_3$ )  $\delta = 197.3, 163.2, 152.7, 136.2, 134.0, 133.9, 129.2, 129.2, 128.2, 127.7, 127.3, 126.2, 125.2, 125.9, 124.1, 111.1, 52.4, 47.3, 42.1, 32.2, 28.1, 28.1$ ; HRMS (TOF ES+): m/z calcd for  $\text{C}_{22}\text{H}_{21}\text{NO}_2$  [(M+H)<sup>+</sup>], 332.1645, found, 332.1643.

**6'-Hydroxy-4',4'-dimethyl-2'-oxo-2',3',4',5'-tetrahydro-[1,1'-biphenyl]-2-carboxylic acid (6)**

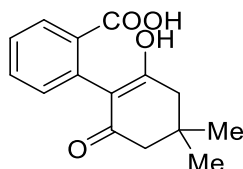

$V_{\text{Petroleum ether}}/V_{\text{Ethyl acetate}} = 1:2$ ,  $R_f = 0.2$ ; White solid: 116mg (89%); mp = 176–177 °C;  $^1\text{H NMR}$  (600 MHz,  $\text{DMSO}-d_6$ )  $\delta = 7.41$  (d,  $J = 8.3$  Hz, 1H, ArH), 7.22 (t,  $J = 7.5$  Hz, 1H, ArH), 7.14 (d,  $J = 6.5$  Hz, 1H, ArH), 6.94 (d,  $J = 6.9$  Hz, 1H, ArH), 2.19 (s, 2H,  $\text{CH}_2$ ), 2.13 (s, 2H,  $\text{CH}_2$ ), 1.04 (s, 6H,  $\text{CH}_3$ );  $^{13}\text{C NMR}$  (150 MHz,  $\text{DMSO}-d_6$ )  $\delta = 197.6, 168.9, 160.4, 135.1, 132.9, 132.8, 130.9, 129.3, 126.5, 115.8, 52.3, 41.7, 31.9, 29.0, 27.8$ ; HRMS (TOF ES+): m/z calcd for  $\text{C}_{15}\text{H}_{16}\text{O}_4$  [(M+H)<sup>+</sup>], 261.1121, found, 261.1126.

#### 4. X-ray Structure and Data<sup>3</sup> of 3b (CCDC 2209204).

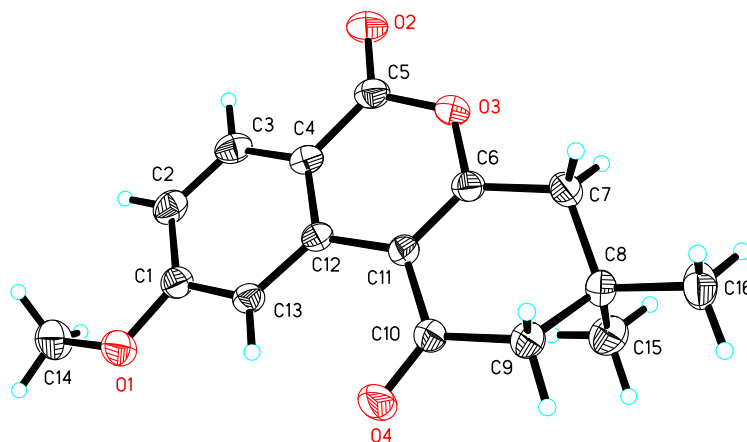

Figure S1 X-Ray crystal structure of 3b.

Table S1 Crystal data and structure refinement for 3b.

|                                   |                                                |                        |
|-----------------------------------|------------------------------------------------|------------------------|
| Empirical formula                 | C <sub>16</sub> H <sub>16</sub> O <sub>4</sub> |                        |
| Formula weight                    | 272.29                                         |                        |
| Temperature                       | 293(2) K                                       |                        |
| Wavelength                        | 1.54184 Å                                      |                        |
| Crystal system, space group       | Monoclinic, P2(1)/c                            |                        |
| Unit cell dimensions              | a = 9.6765(5) Å                                | alpha = 90 deg.        |
|                                   | b = 13.7501(6) Å                               | beta = 105.149(5) deg. |
|                                   | c = 10.5137(5) Å                               | gamma = 90 deg.        |
| Volume                            | 1350.27(11) Å <sup>3</sup>                     |                        |
| Z, Calculated density             | 4, 1.339 Mg/m <sup>3</sup>                     |                        |
| Absorption coefficient            | 0.789 mm <sup>-1</sup>                         |                        |
| F(000)                            | 576                                            |                        |
| Crystal size                      | 0.230 x 0.220 x 0.200 mm                       |                        |
| Theta range for data collection   | 5.418 to 67.240 deg.                           |                        |
| Limiting indices                  | -11 ≤ h ≤ 11, -16 ≤ k ≤ 15, -12 ≤ l ≤ 9        |                        |
| Completeness to theta = 67.240    | 99.4%                                          |                        |
| Reflections collected / unique    | 4661 / 2415 [R(int) = 0.0249]                  |                        |
| Refinement method                 | Full-matrix least-squares on F <sup>2</sup>    |                        |
| Data/restraints/parameters        | 2415 / 0 / 184                                 |                        |
| Goodness-of-fit on F <sup>2</sup> | 1.022                                          |                        |
| Final R indices [I > 2σ(I)]       | R1 = 0.0456, wR2 = 0.1194                      |                        |
| R indices (all data)              | R1 = 0.0554, wR2 = 0.1286                      |                        |
| Extinction coefficient            | n/a                                            |                        |
| Largest diff. peak and hole       | 0.153 and -0.194 e.Å <sup>-3</sup>             |                        |



**5.  $^1\text{H}$  NMR and  $^{13}\text{C}$  NMR spectra for spectroscopic data.**

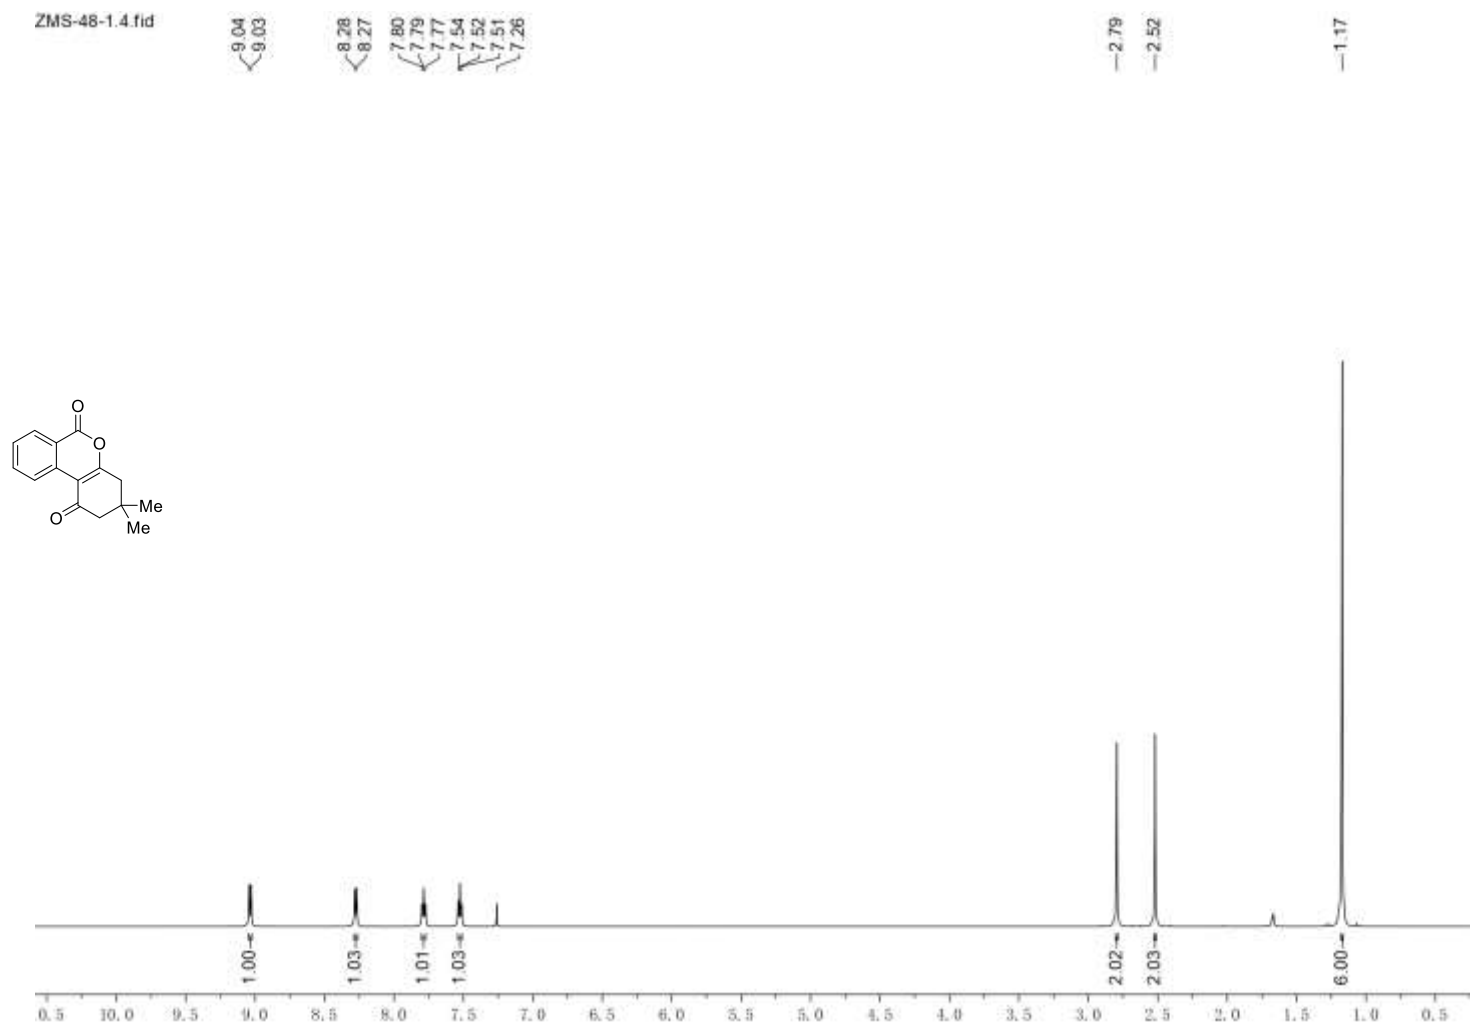

**Figure S2.**  $^1\text{H}$  NMR (600 MHz,  $\text{CDCl}_3$ ) spectra of compound **3a**

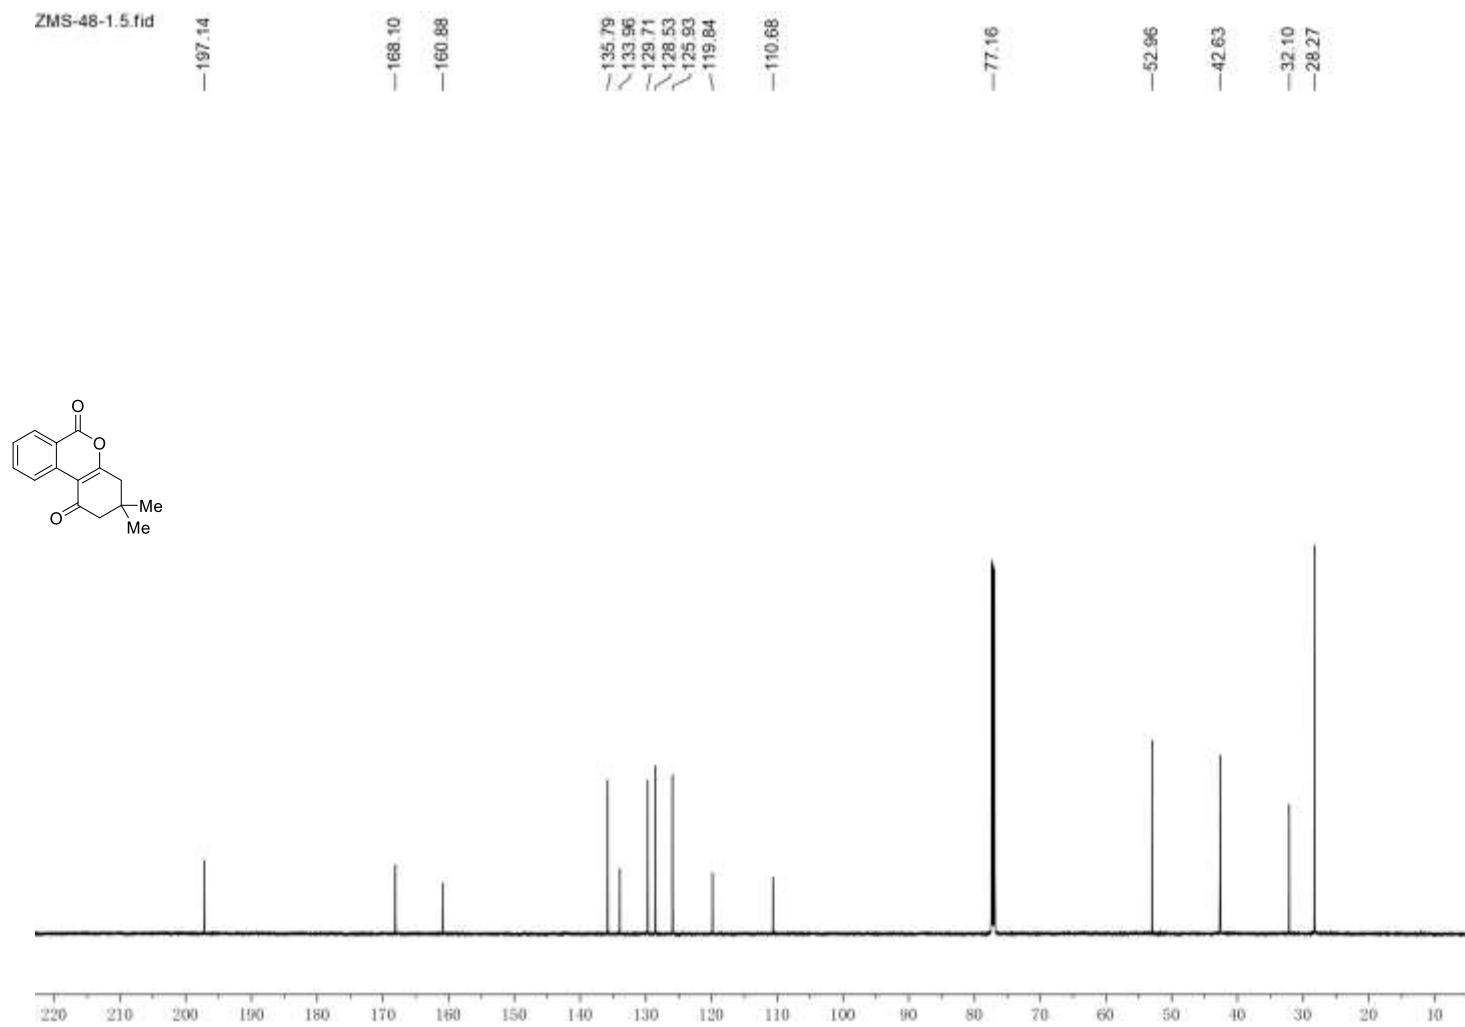

**Figure S3.**  $^{13}\text{C}$  NMR (150 MHz,  $\text{CDCl}_3$ ) spectra of compound **3a**

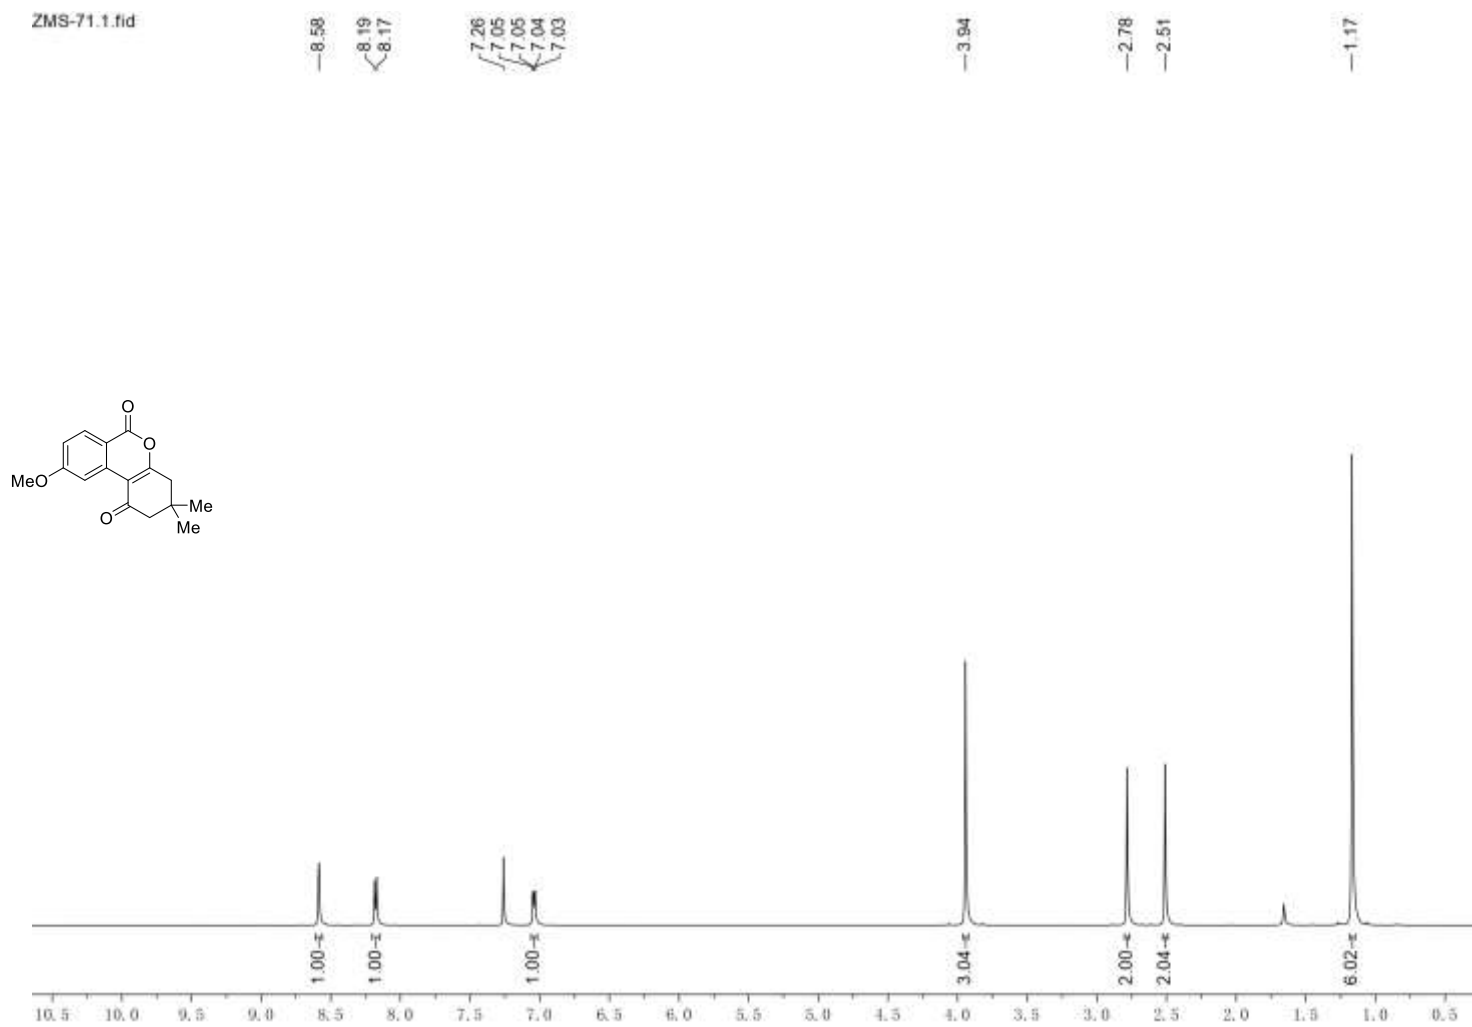

**Figure S4.**  $^1\text{H}$  NMR (600 MHz,  $\text{CDCl}_3$ ) spectra of compound **3b**

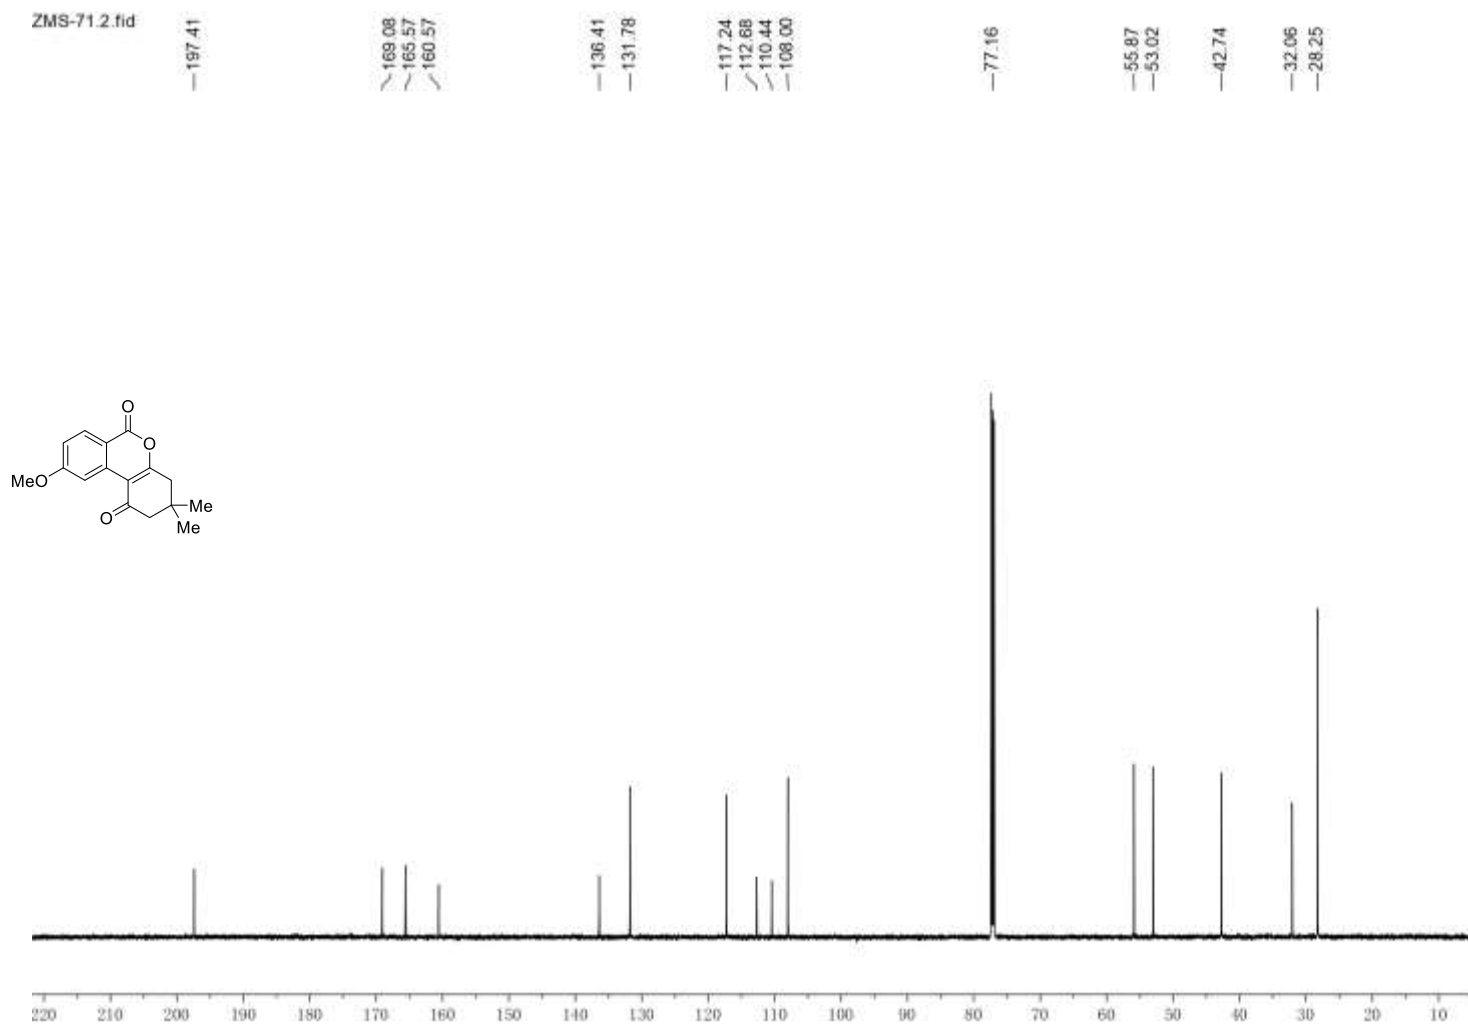

Figure S5.  $^{13}\text{C}$  NMR (150 MHz,  $\text{CDCl}_3$ ) spectra of compound **3b**

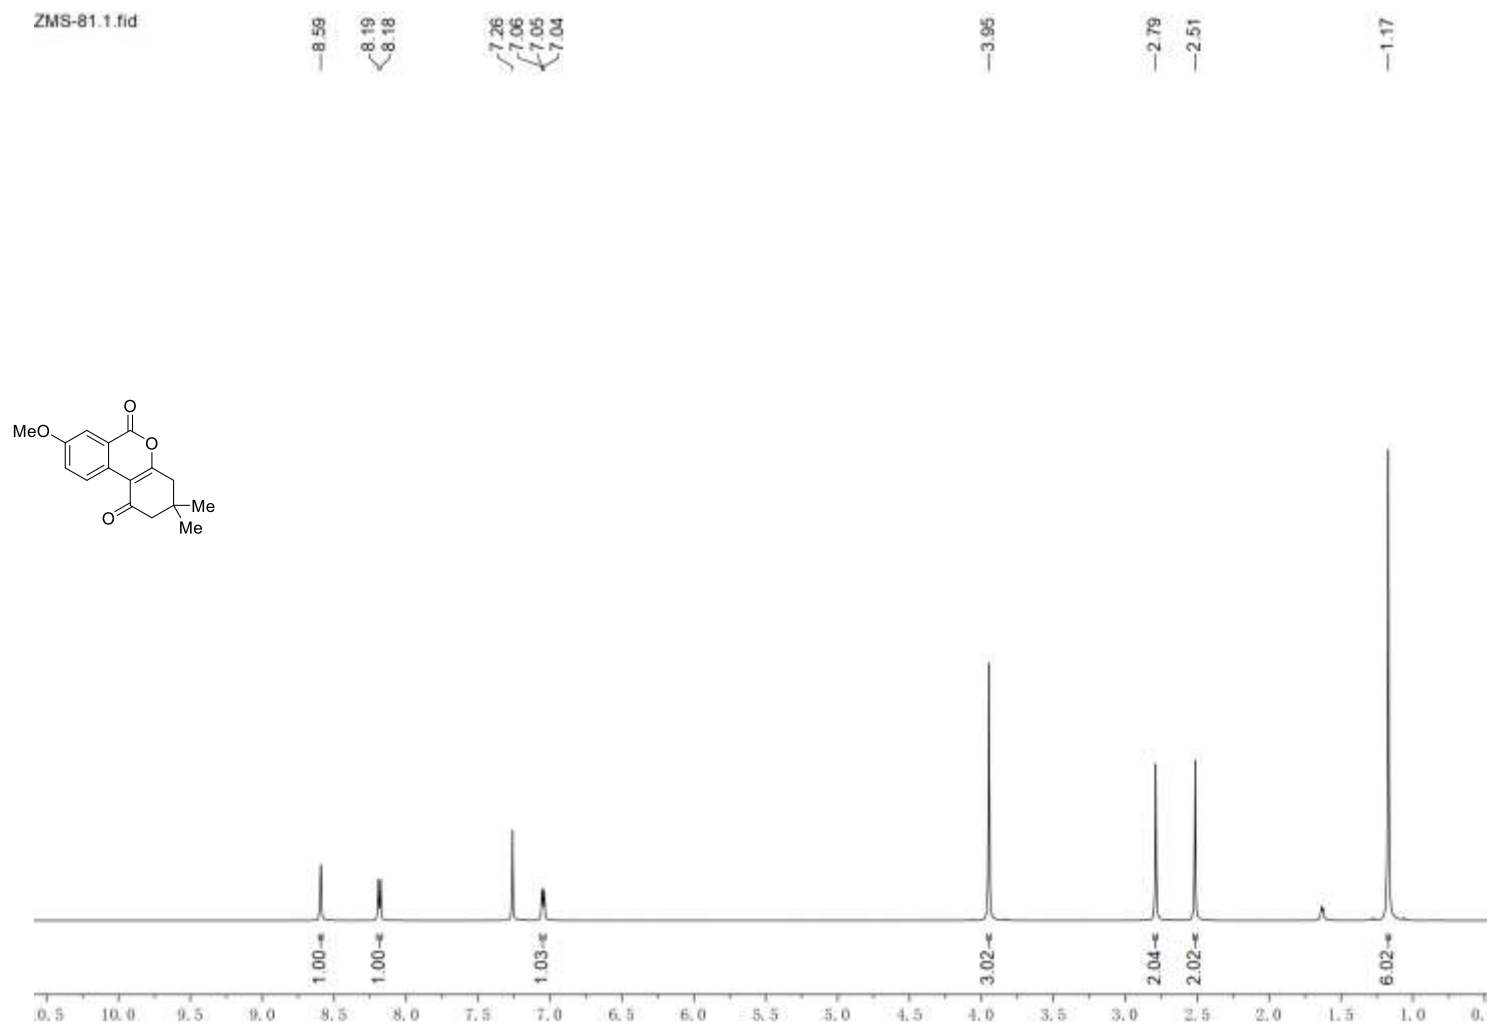

**Figure S6.**  $^1\text{H}$  NMR (600 MHz,  $\text{CDCl}_3$ ) spectra of compound **3c**

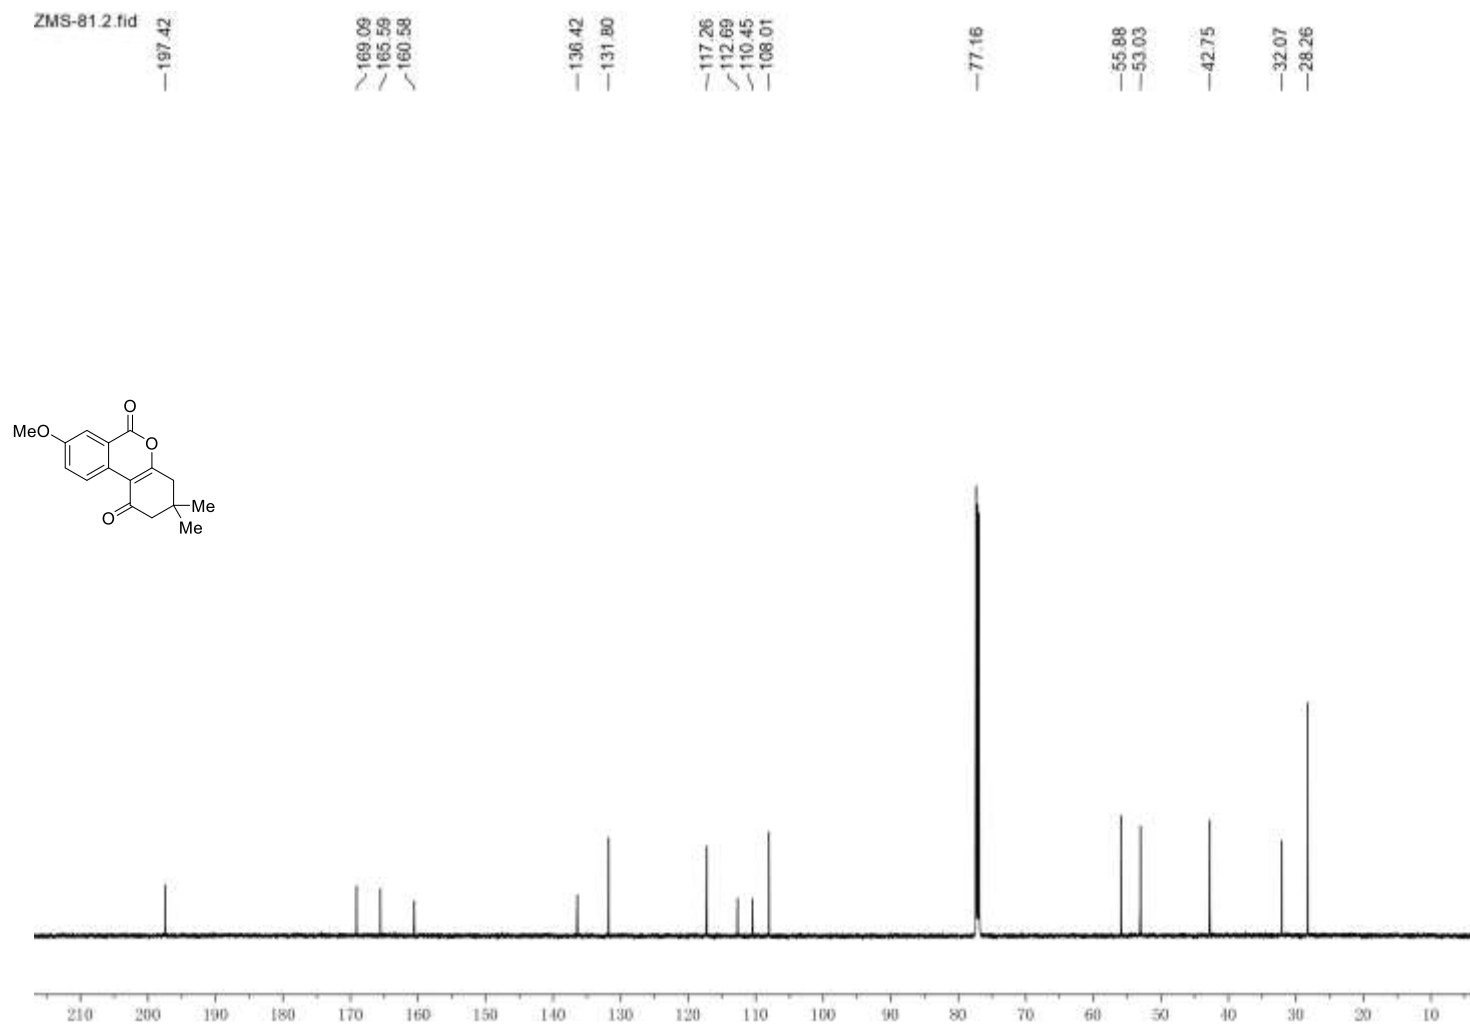

**Figure S7.**  $^{13}\text{C}$  NMR (150 MHz,  $\text{CDCl}_3$ ) spectra of compound **3c**

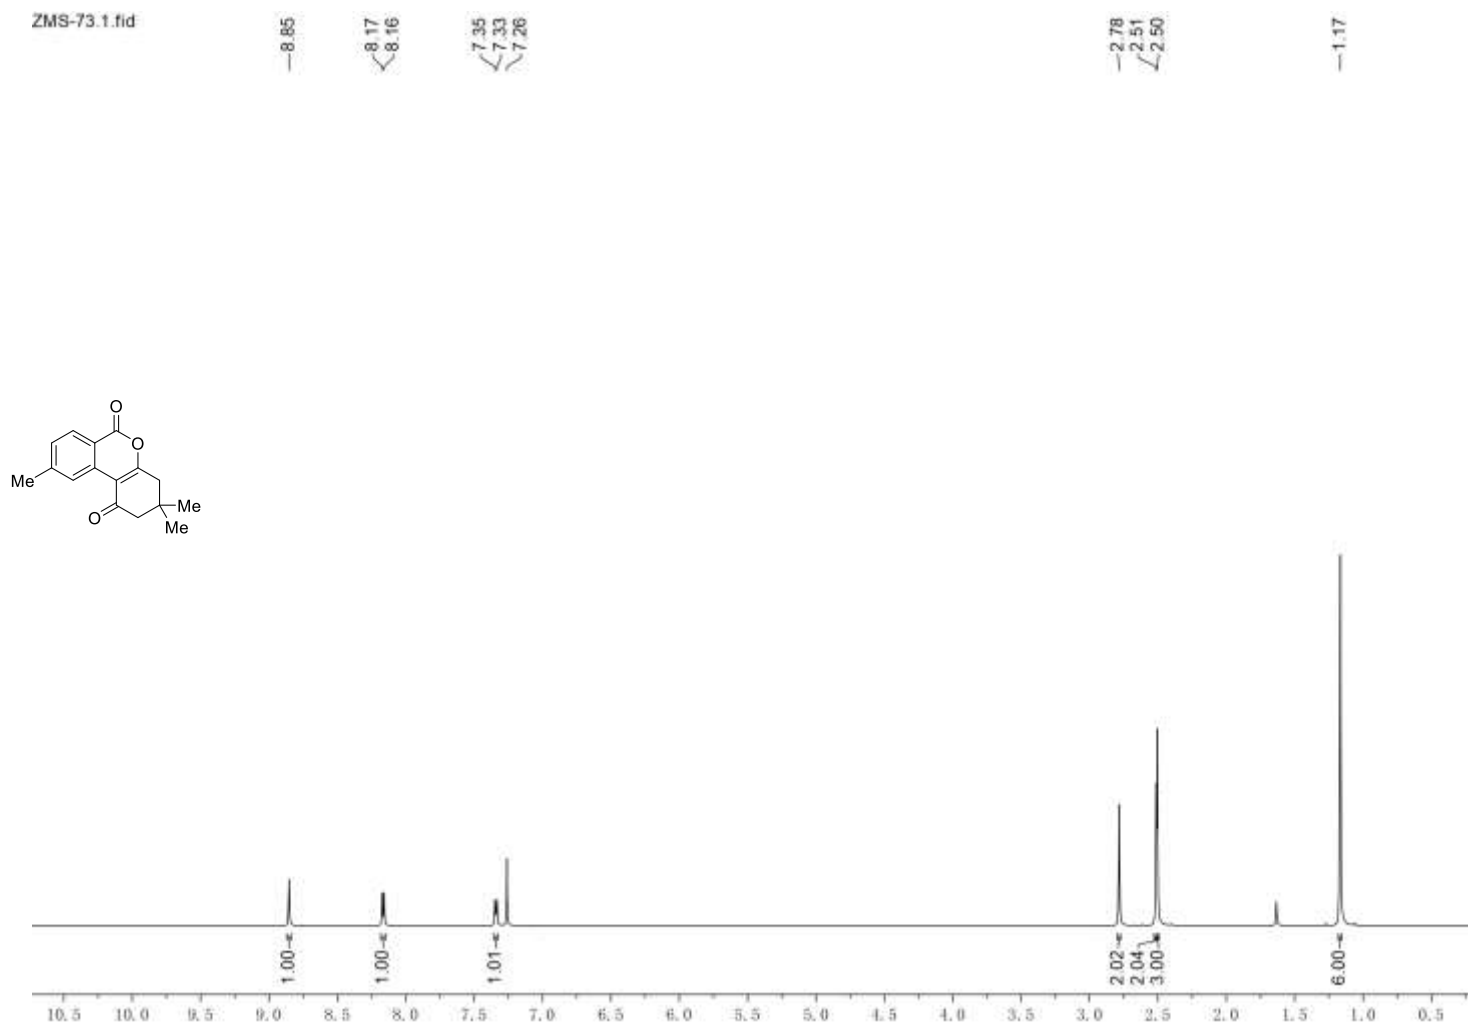

**Figure S8.**  $^1\text{H}$  NMR (600 MHz,  $\text{CDCl}_3$ ) spectra of compound **3d**



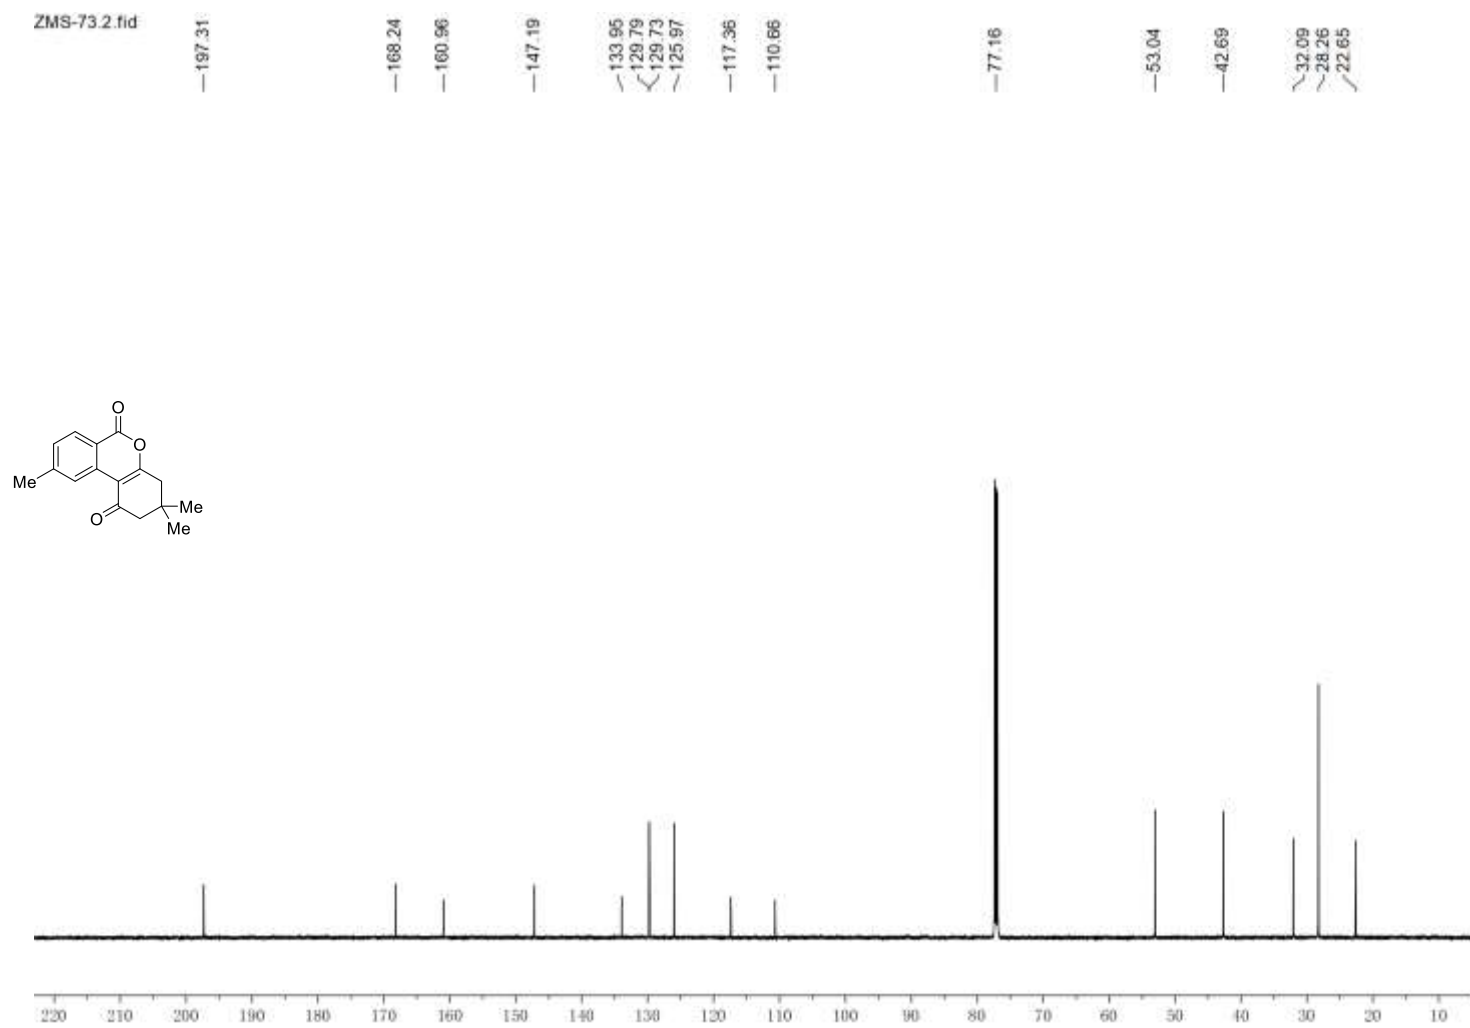

**Figure S9.**  $^{13}\text{C}$  NMR (150 MHz,  $\text{CDCl}_3$ ) spectra of compound **3d**

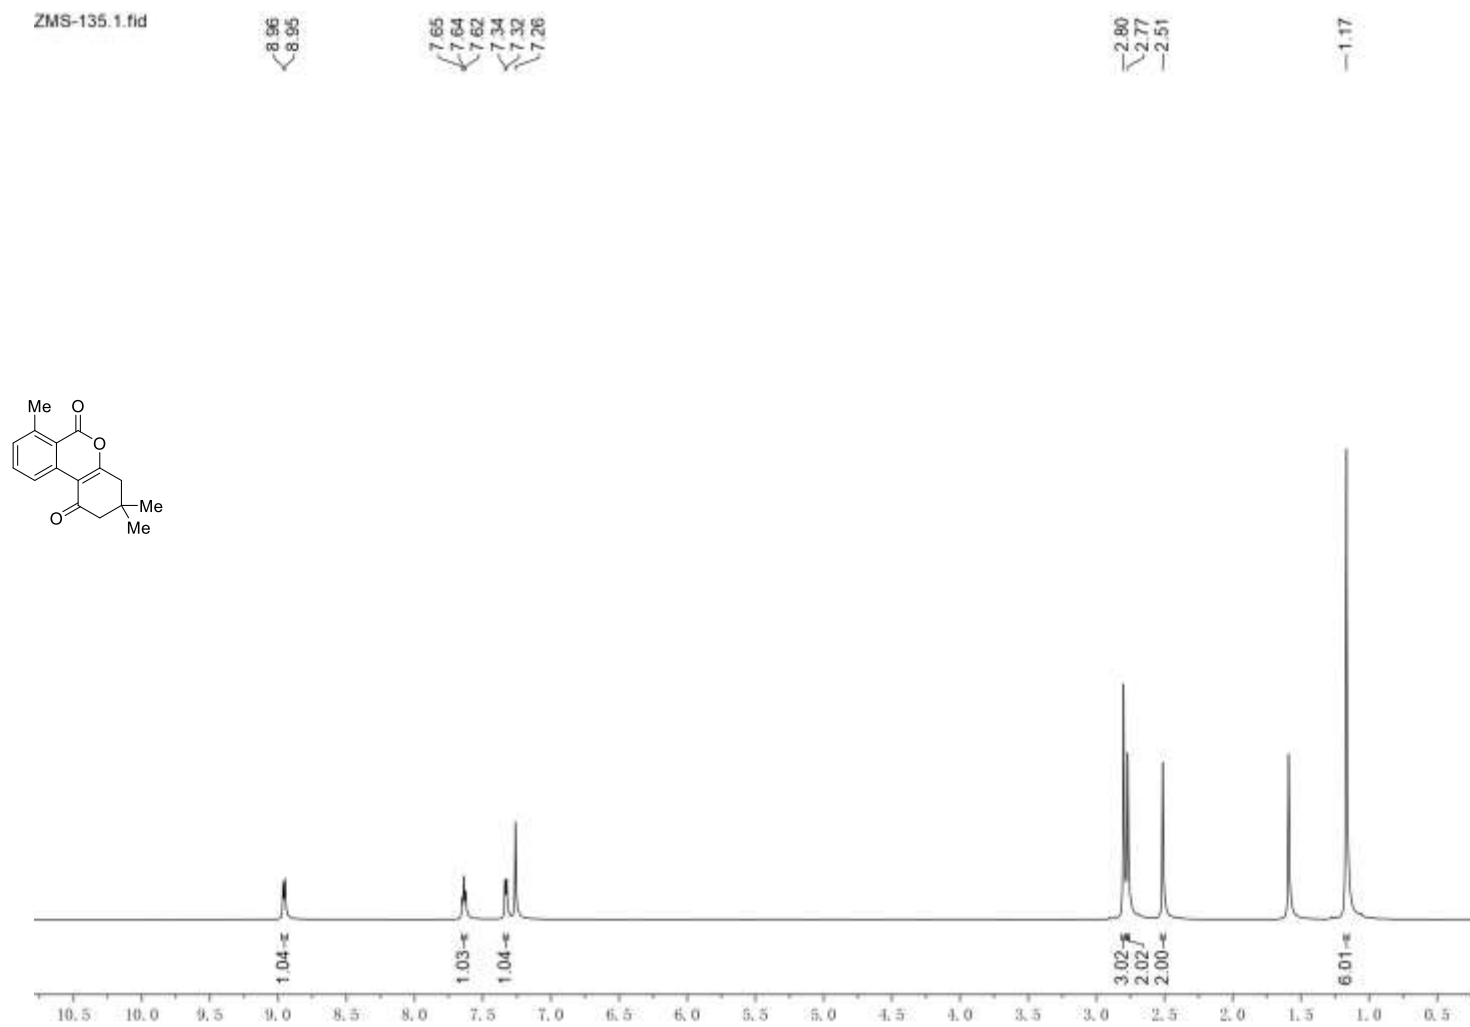

**Figure S10.**  $^1\text{H}$  NMR (600 MHz,  $\text{CDCl}_3$ ) spectra of compound **3e**

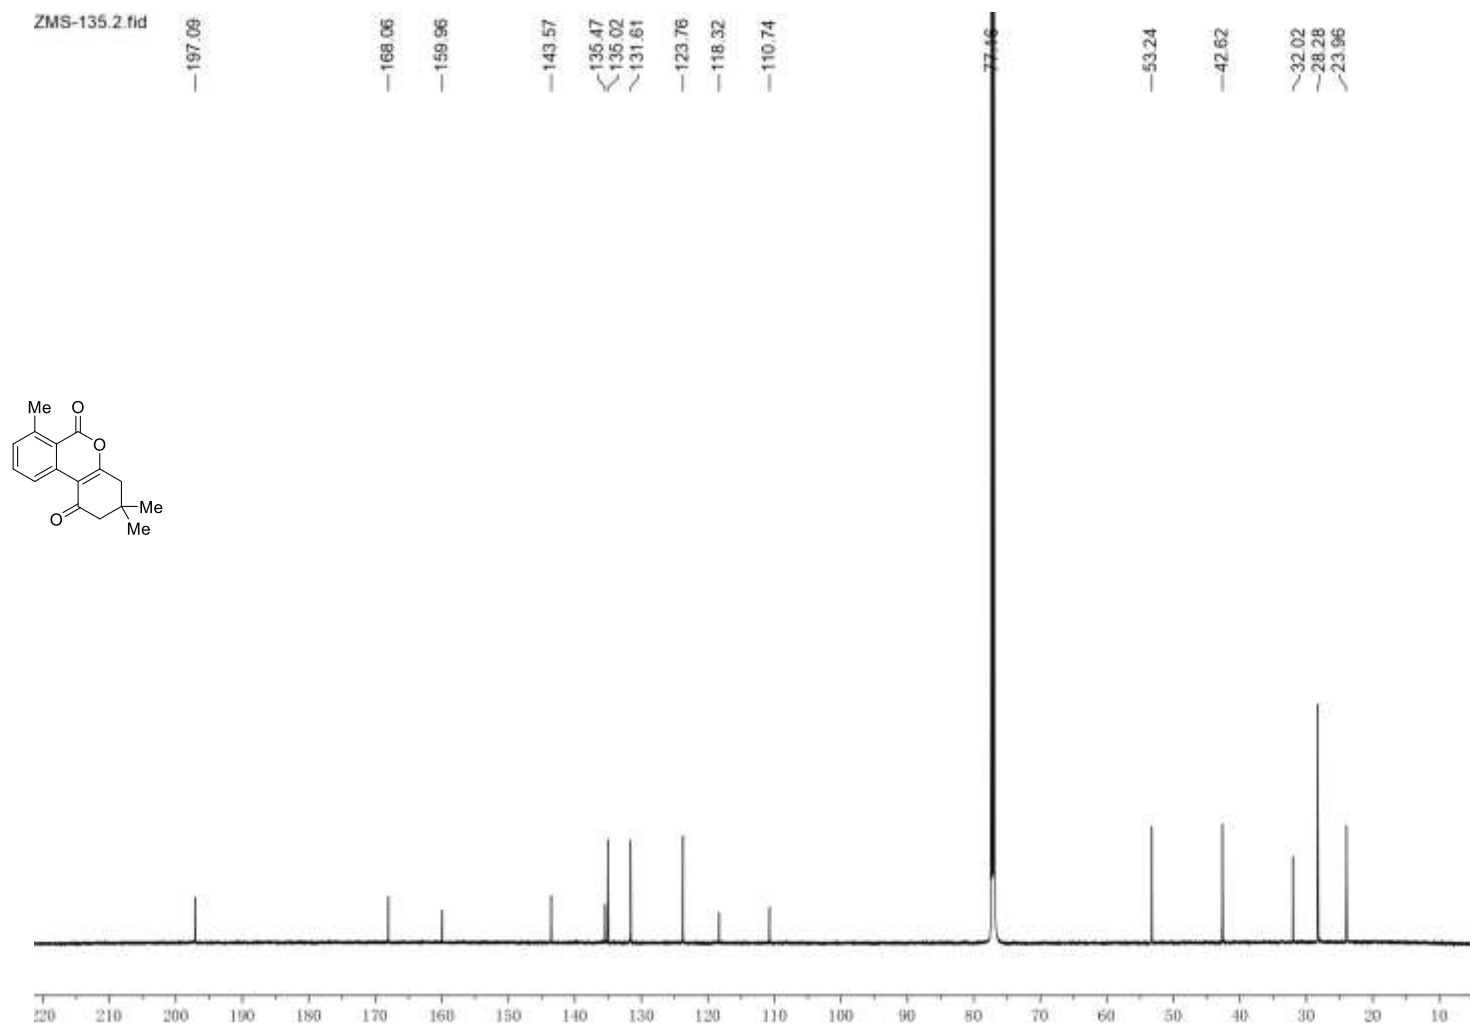

**Figure S11.**  $^{13}\text{C}$  NMR (150 MHz,  $\text{CDCl}_3$ ) spectra of compound **3e**

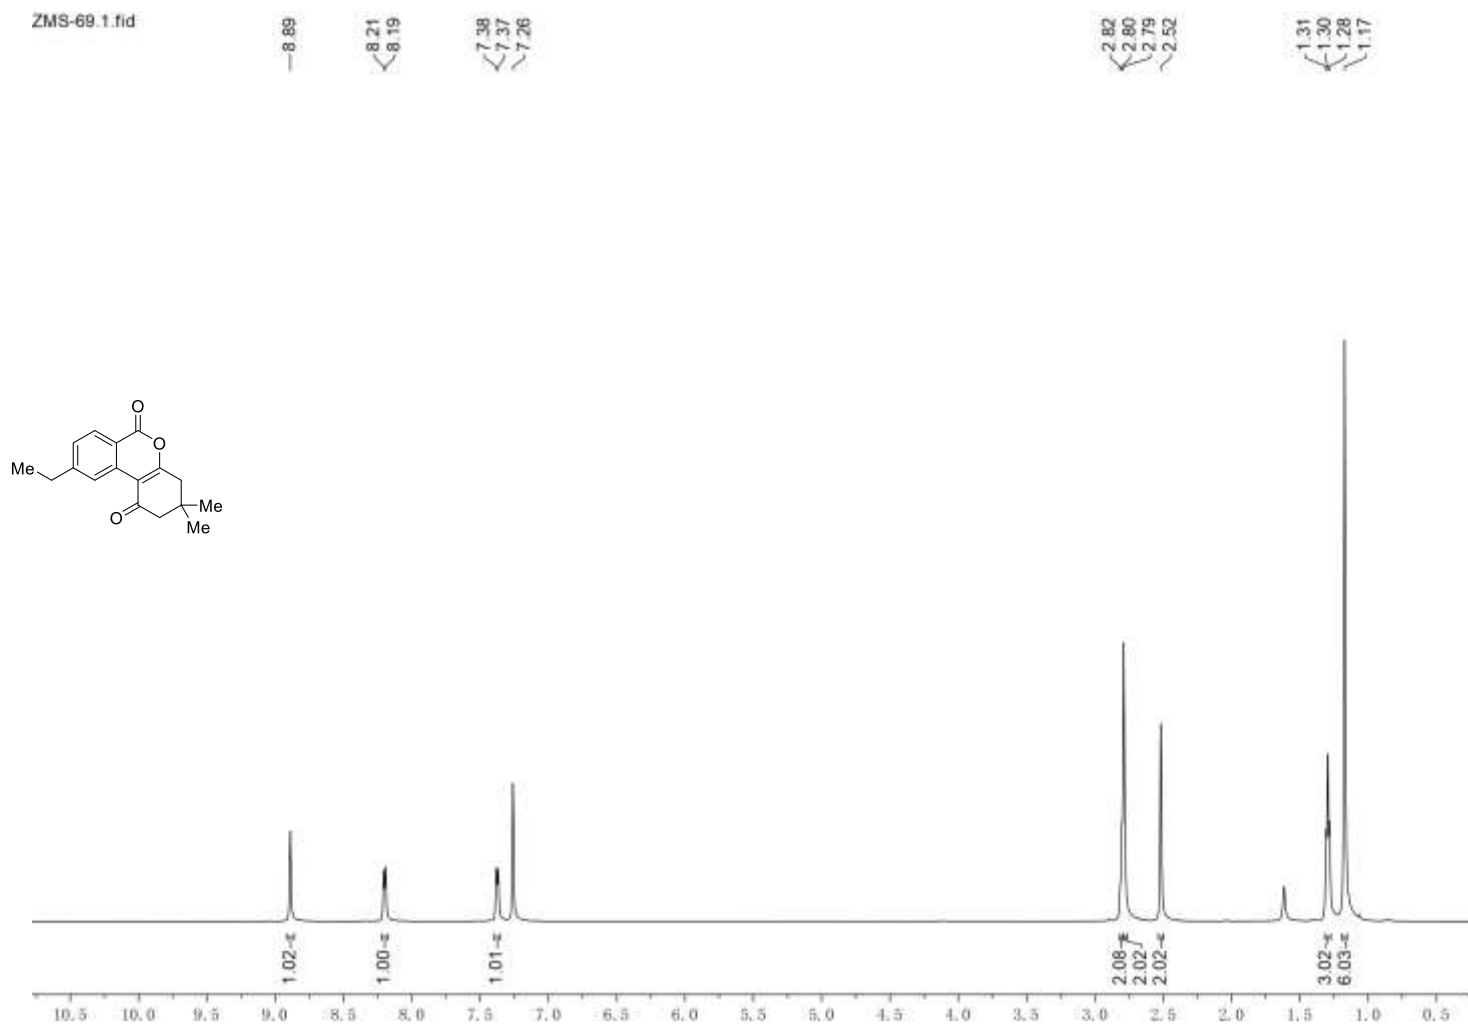

**Figure S12.**  $^1\text{H}$  NMR (600 MHz,  $\text{CDCl}_3$ ) spectra of compound **3f**

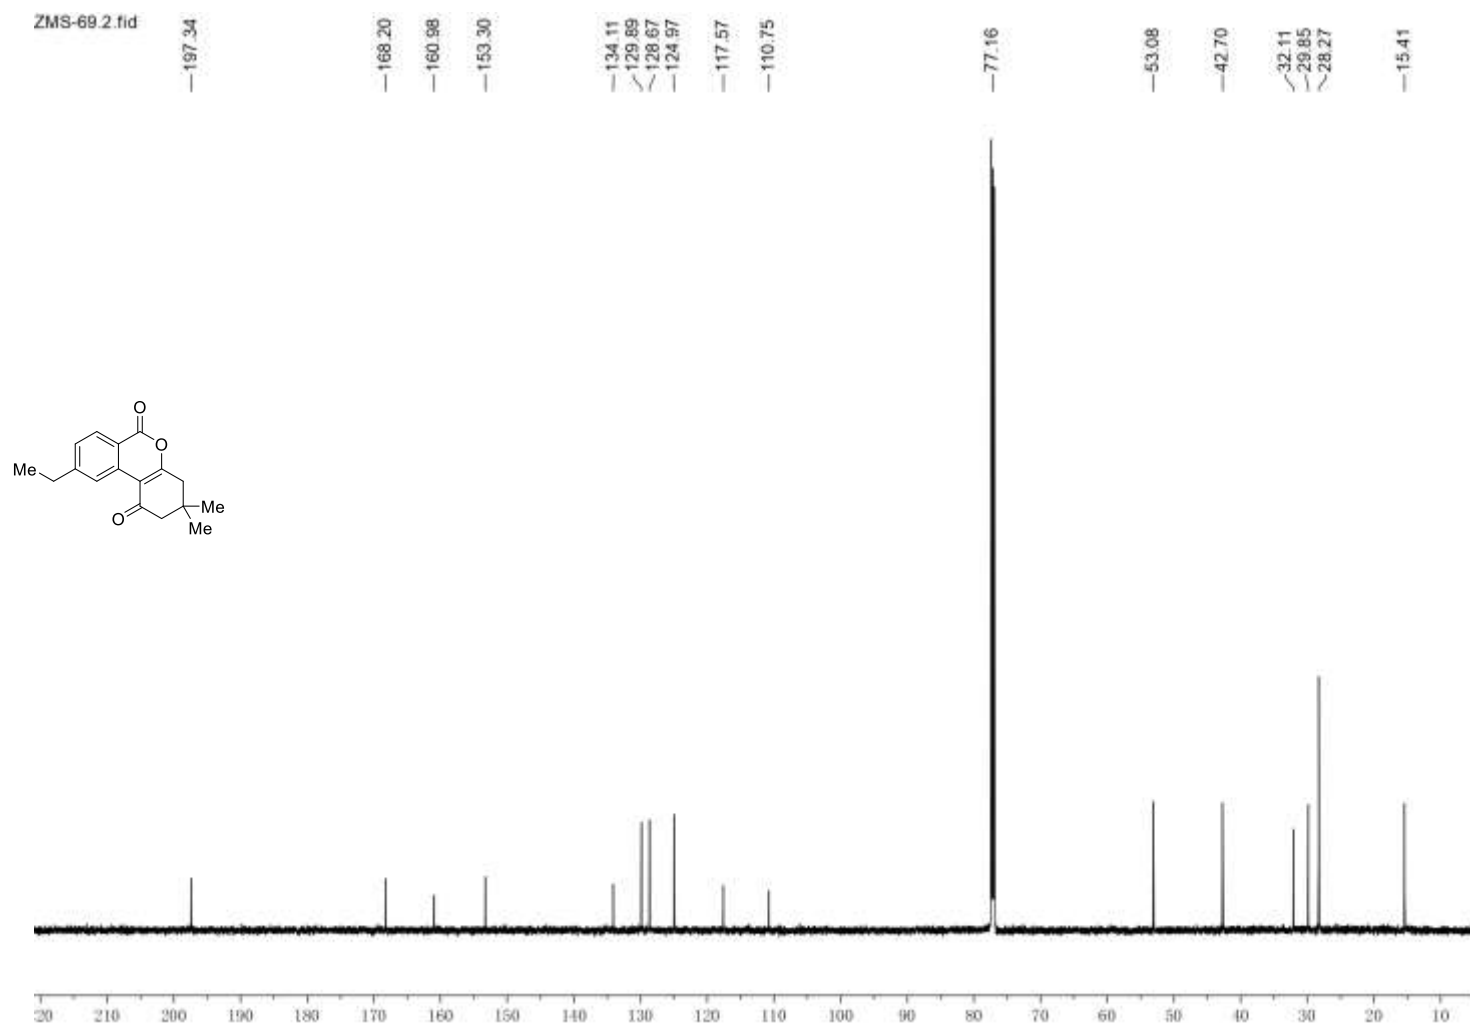

**Figure S13.**  $^{13}\text{C}$  NMR (150 MHz,  $\text{CDCl}_3$ ) spectra of compound **3f**

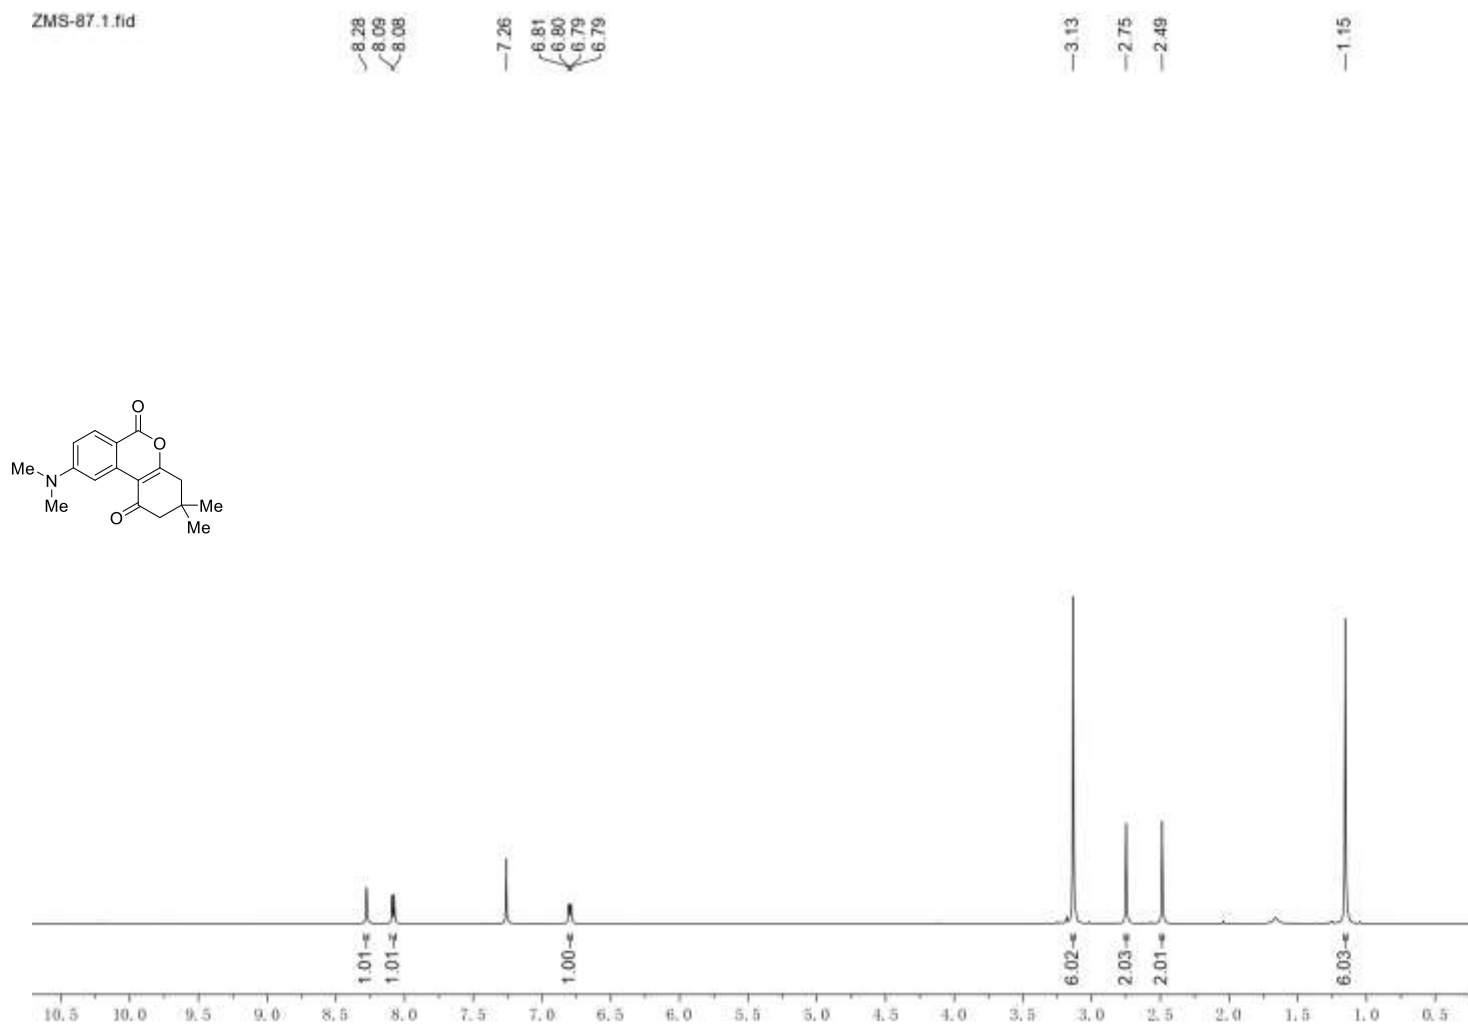

**Figure S14.**  $^1\text{H}$  NMR (600 MHz,  $\text{CDCl}_3$ ) spectra of compound **3g**

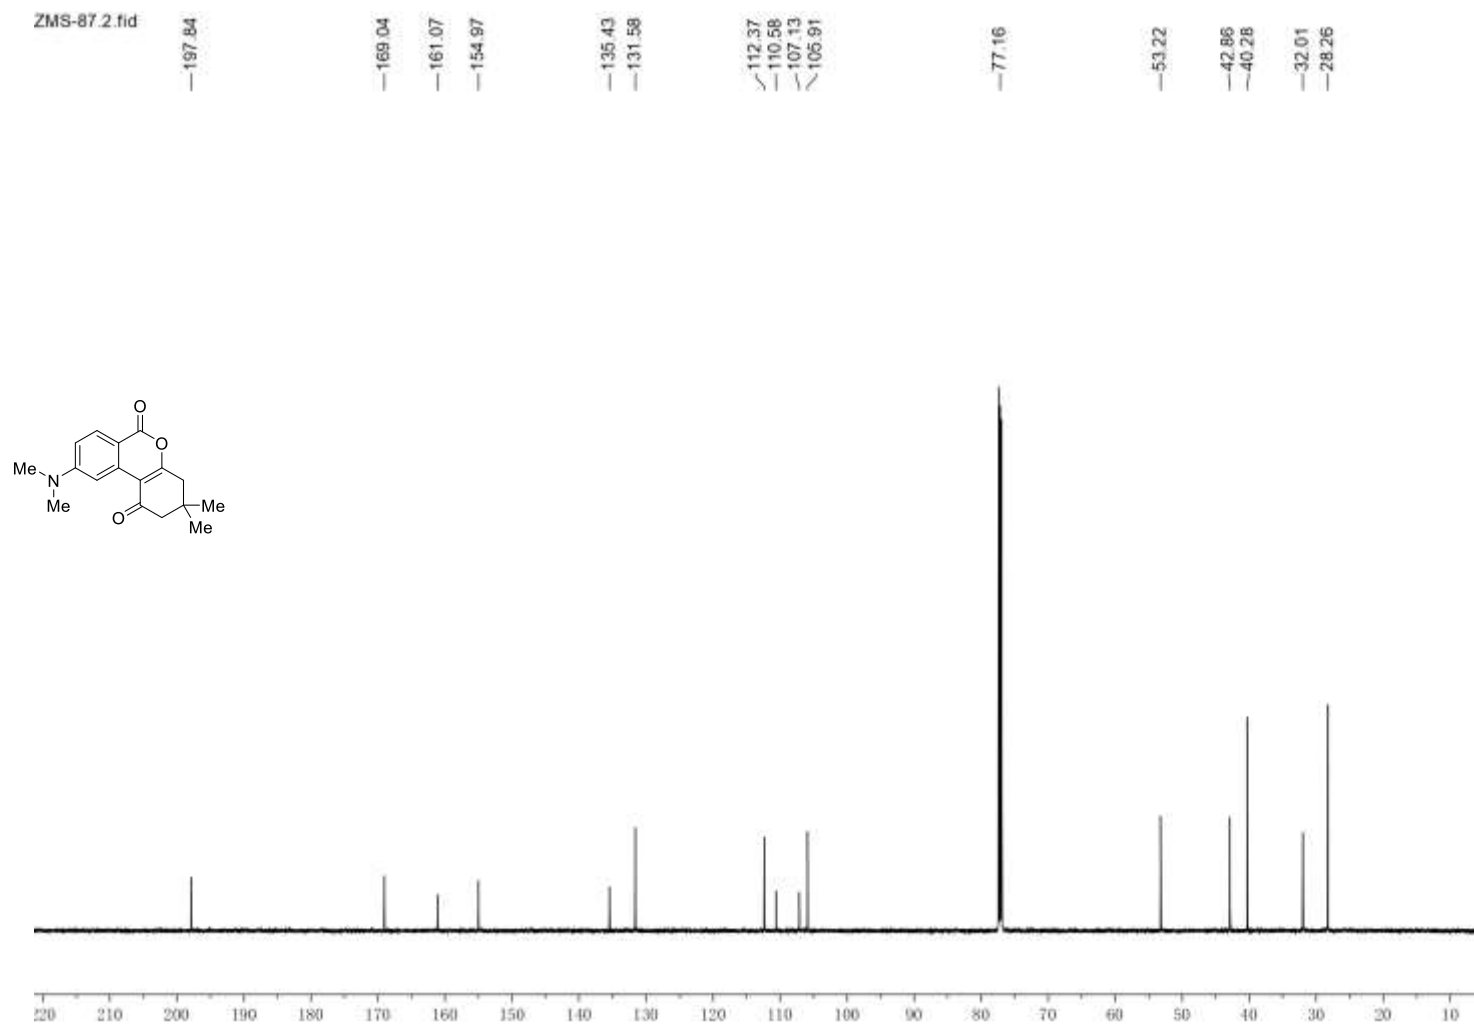

**Figure S15.**  $^{13}\text{C}$  NMR (150 MHz,  $\text{CDCl}_3$ ) spectra of compound **3g**

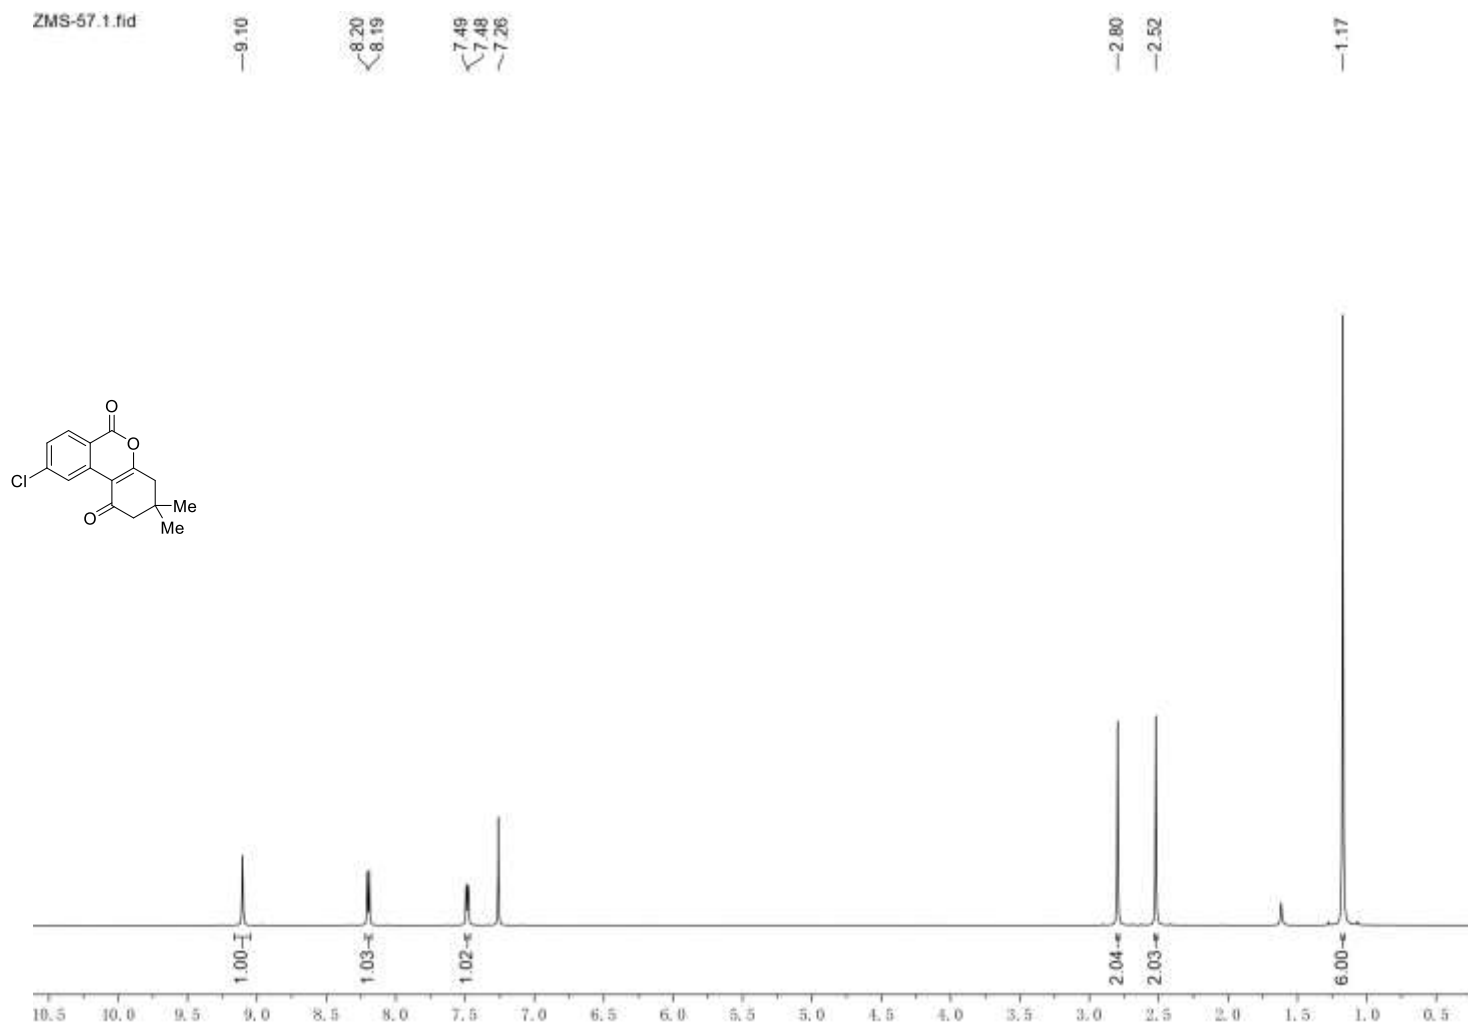

**Figure S16.**  $^1\text{H}$  NMR (600 MHz,  $\text{CDCl}_3$ ) spectra of compound **3h**



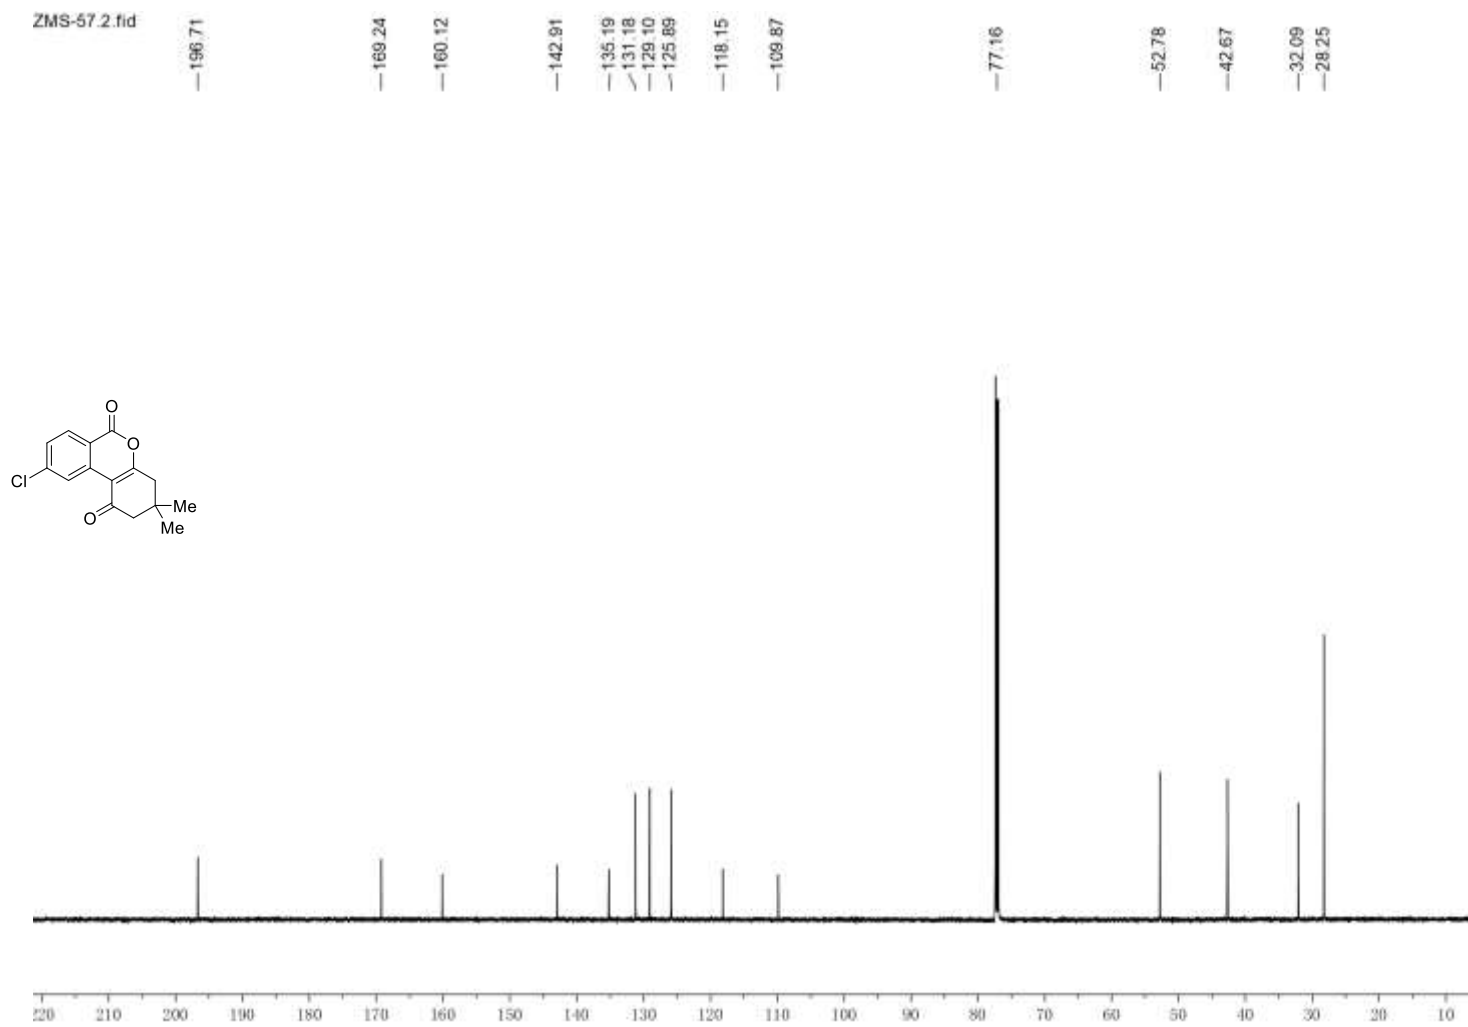

**Figure S17.**  $^{13}\text{C}$  NMR (150 MHz,  $\text{CDCl}_3$ ) spectra of compound **3h**

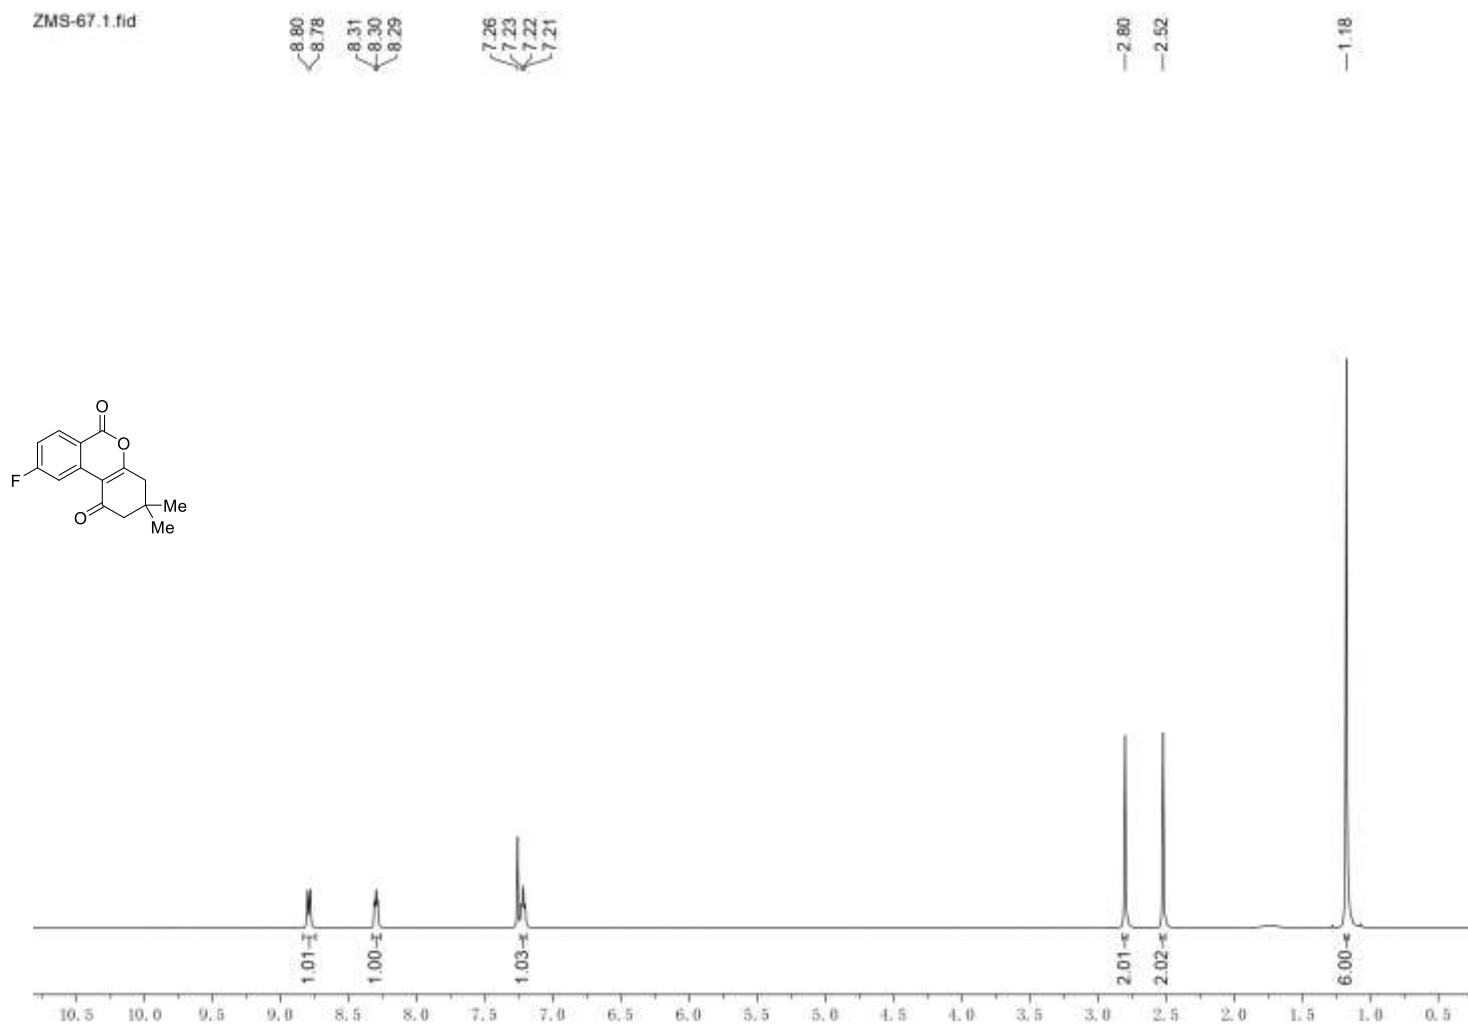

**Figure S18.**  $^1\text{H}$  NMR (600 MHz,  $\text{CDCl}_3$ ) spectra of compound **3i**

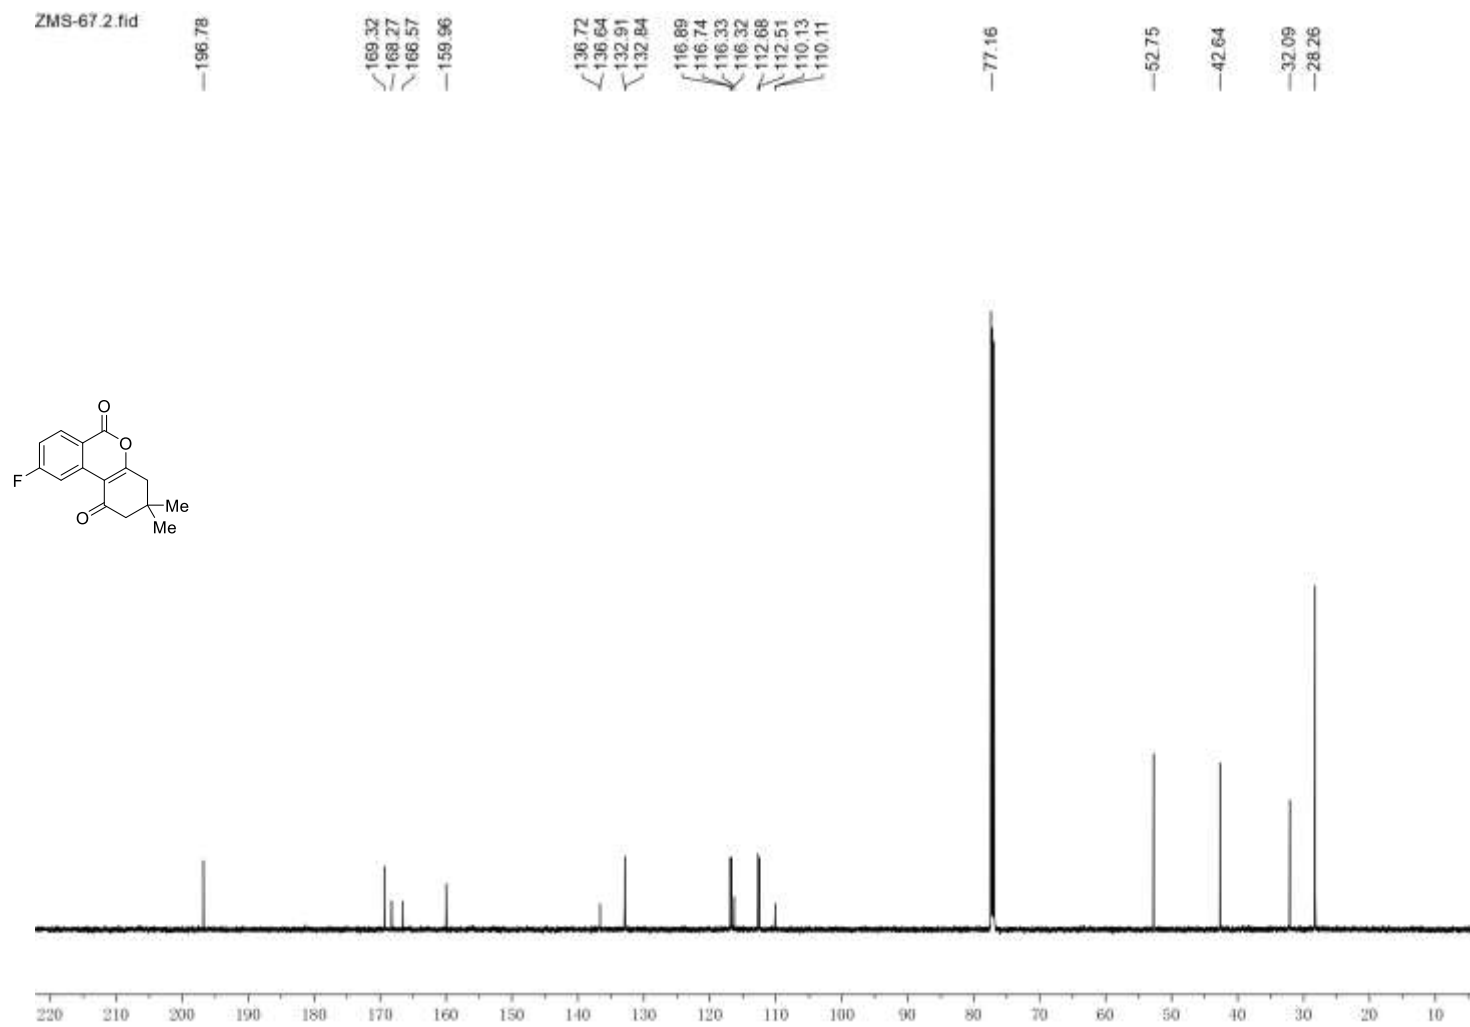

**Figure S19.**  $^{13}\text{C}$  NMR (150 MHz,  $\text{CDCl}_3$ ) spectra of compound **3i**

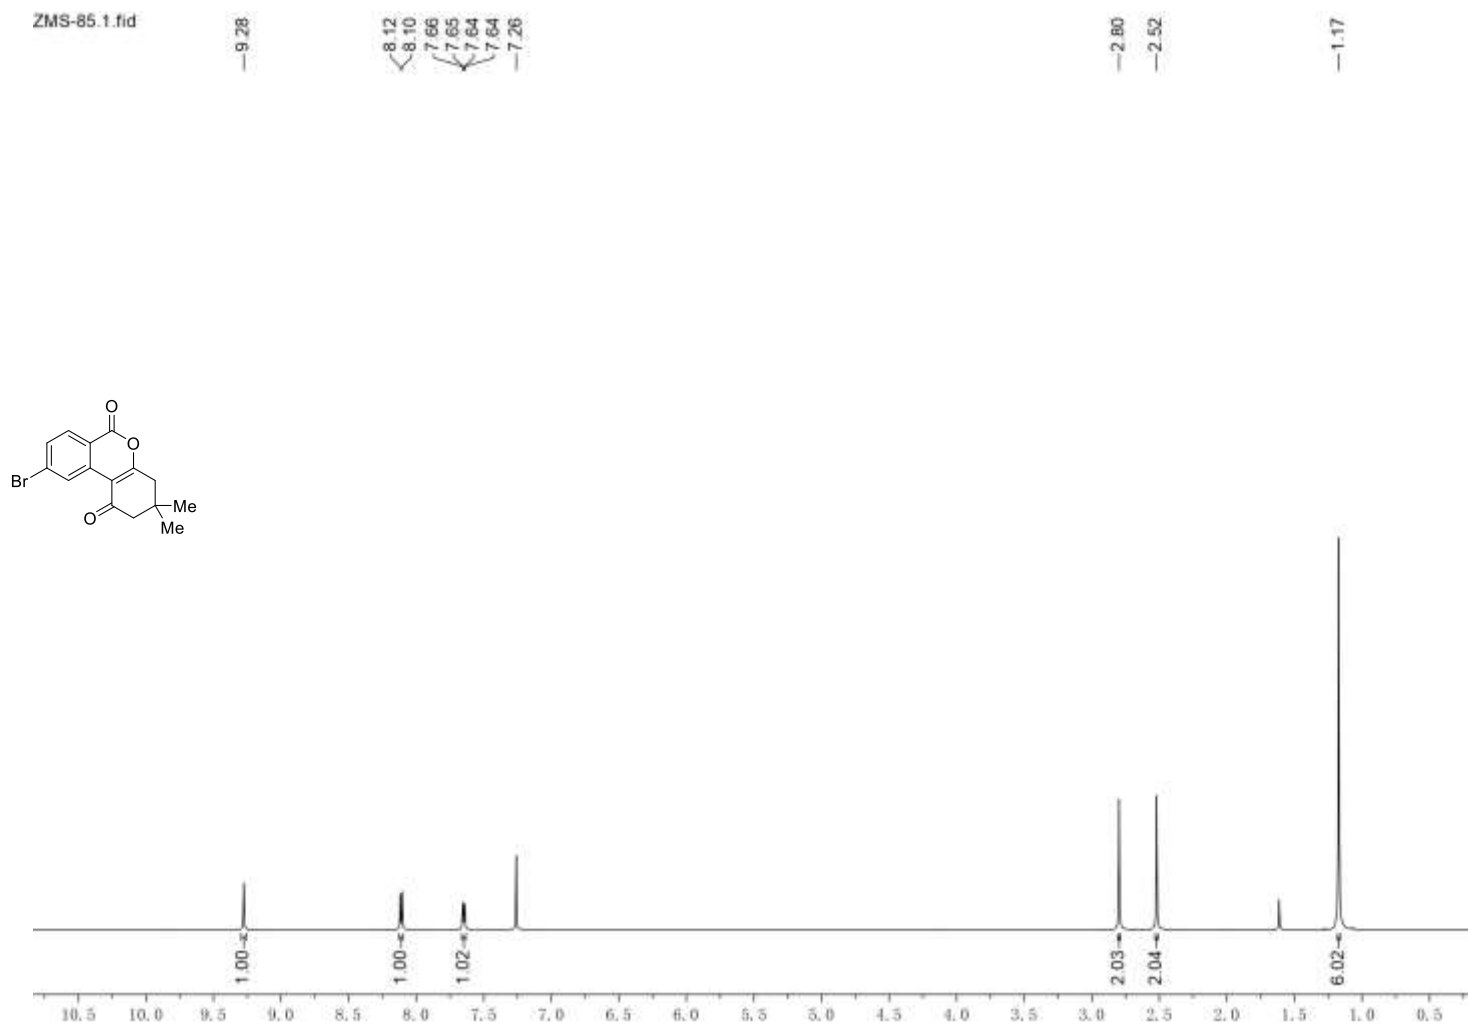

Figure S20.  $^1\text{H}$  NMR (600 MHz,  $\text{CDCl}_3$ ) spectra of compound **3j**

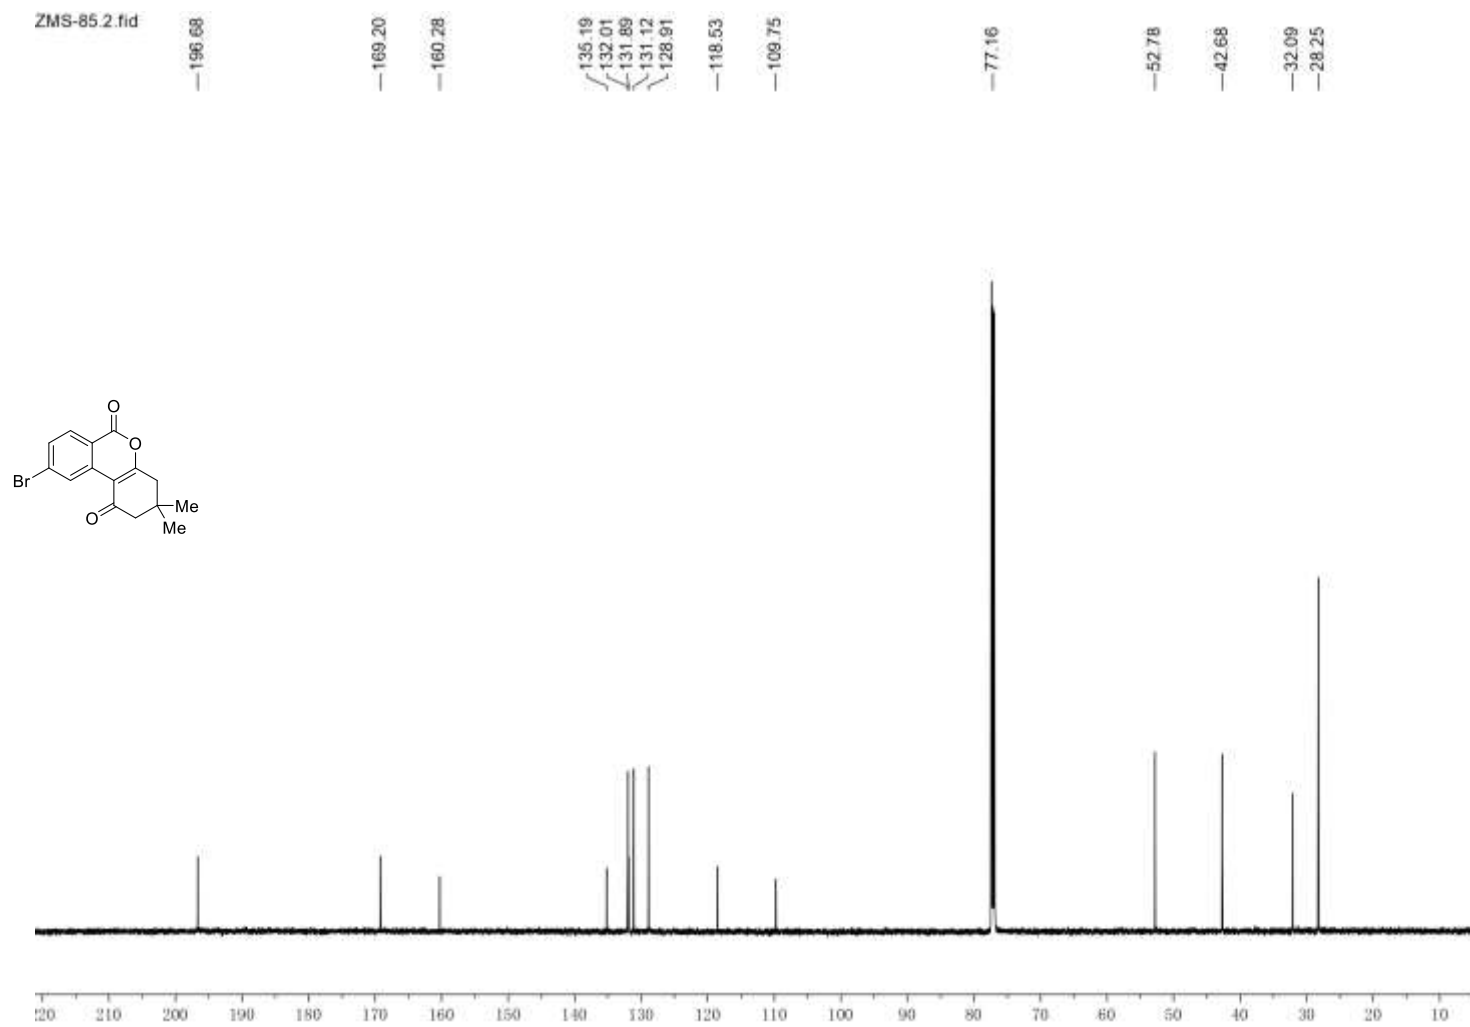

**Figure S21.**  $^{13}\text{C}$  NMR (150 MHz,  $\text{CDCl}_3$ ) spectra of compound **3j**

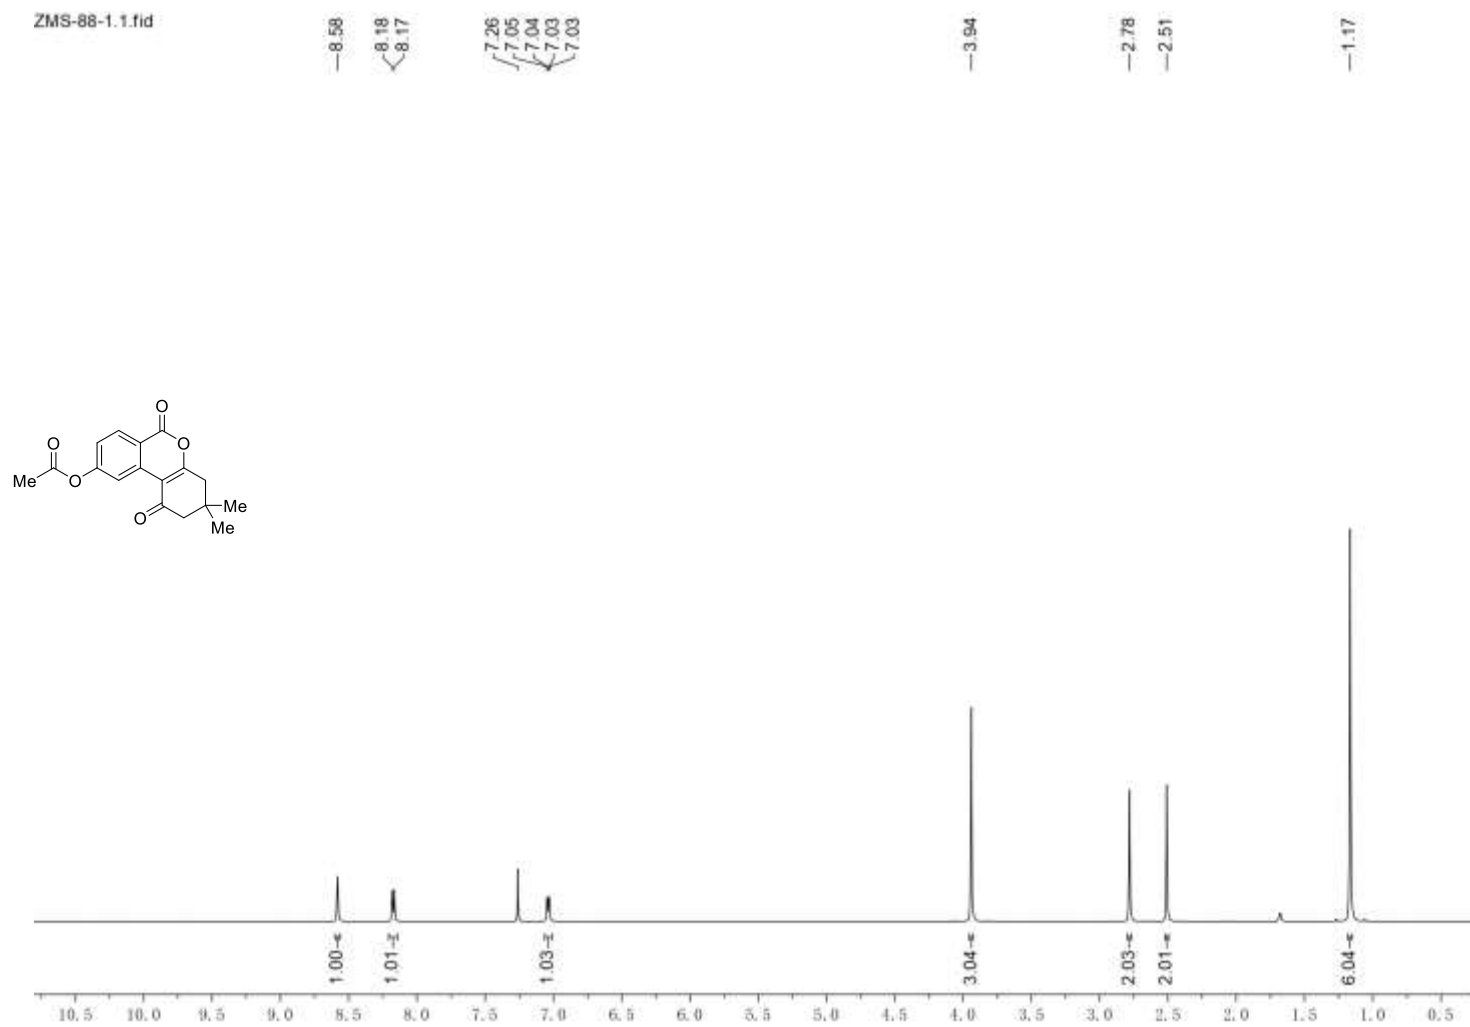

**Figure S22.**  $^1\text{H}$  NMR (600 MHz,  $\text{CDCl}_3$ ) spectra of compound **3k**

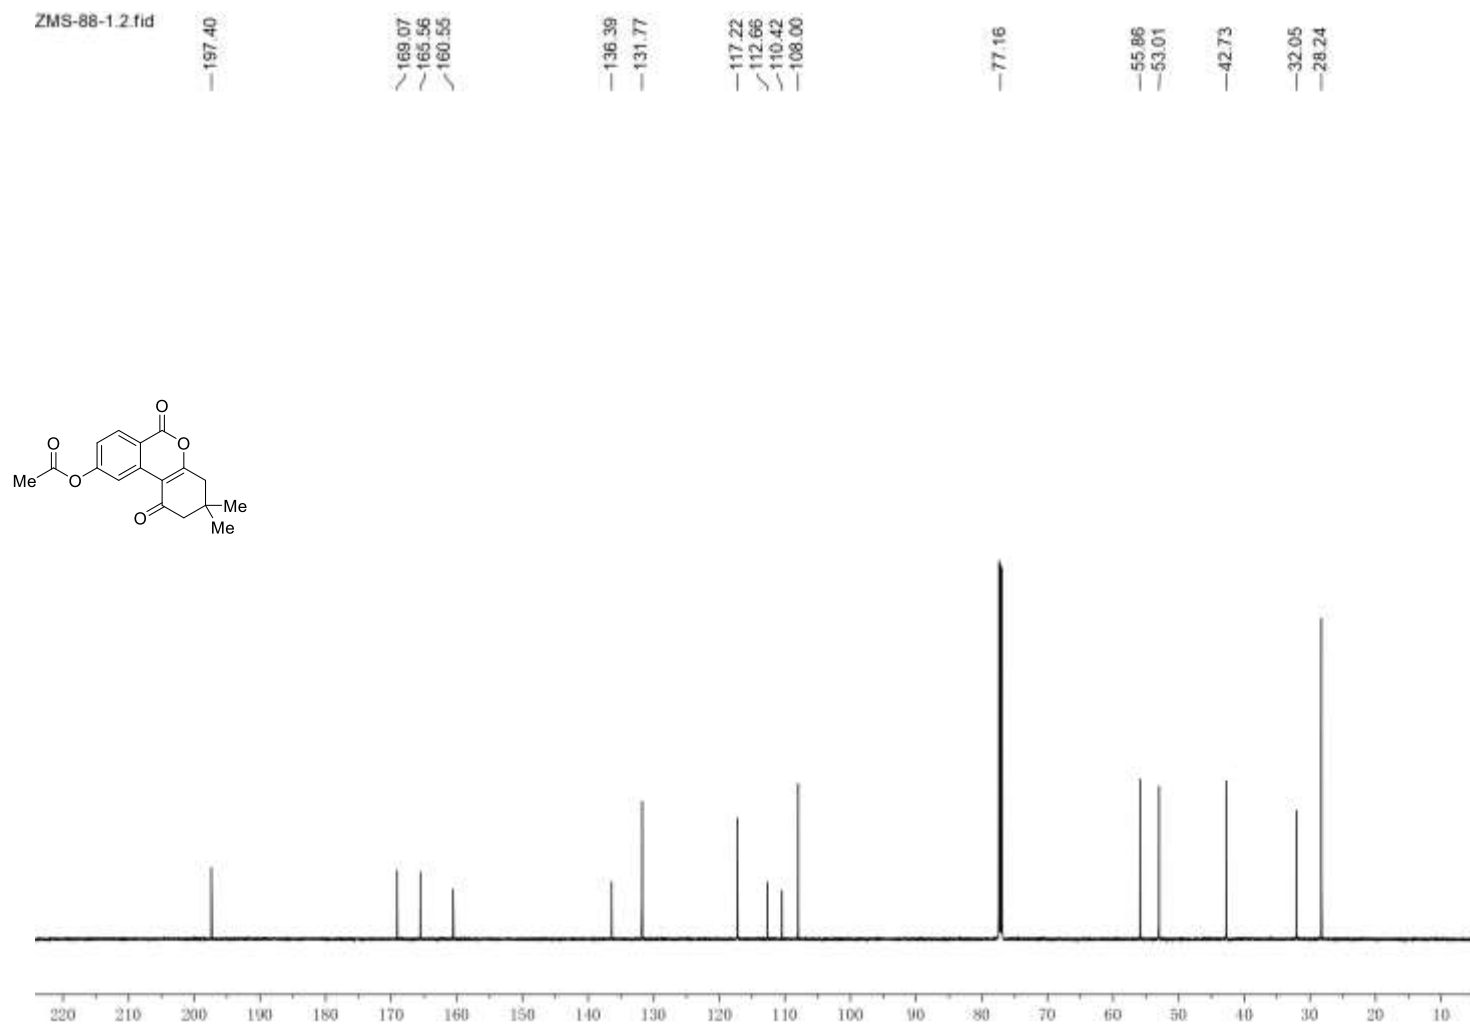

**Figure S23.**  $^{13}\text{C}$  NMR (150 MHz,  $\text{CDCl}_3$ ) spectra of compound **3k**

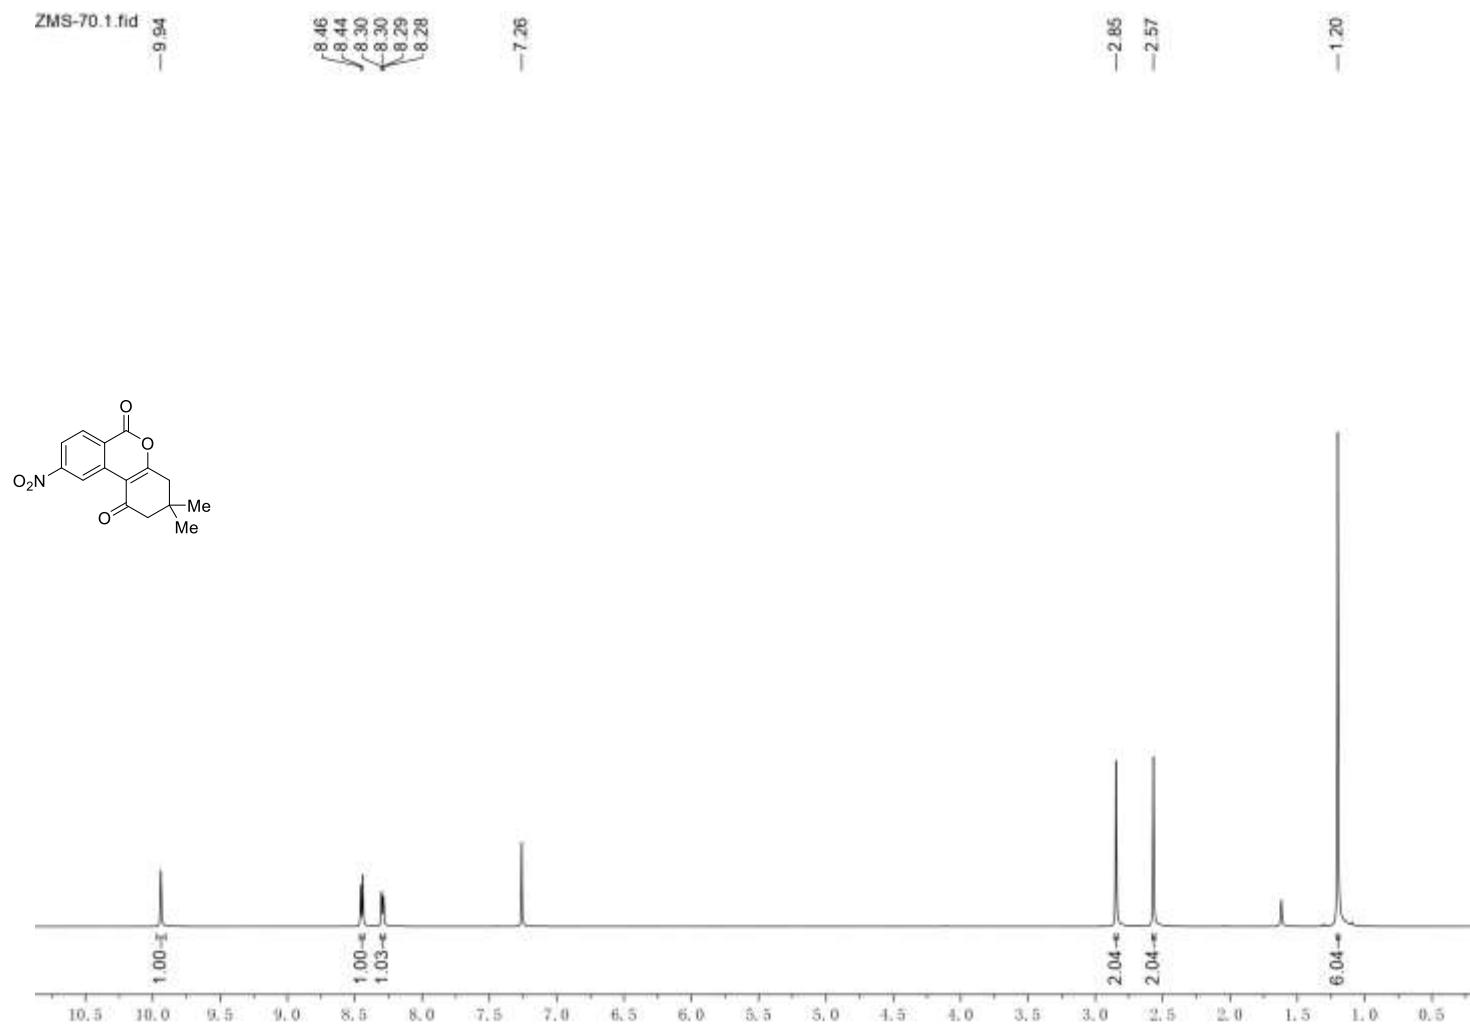

Figure S24.  $^1\text{H}$  NMR (600 MHz,  $\text{CDCl}_3$ ) spectra of compound **31**



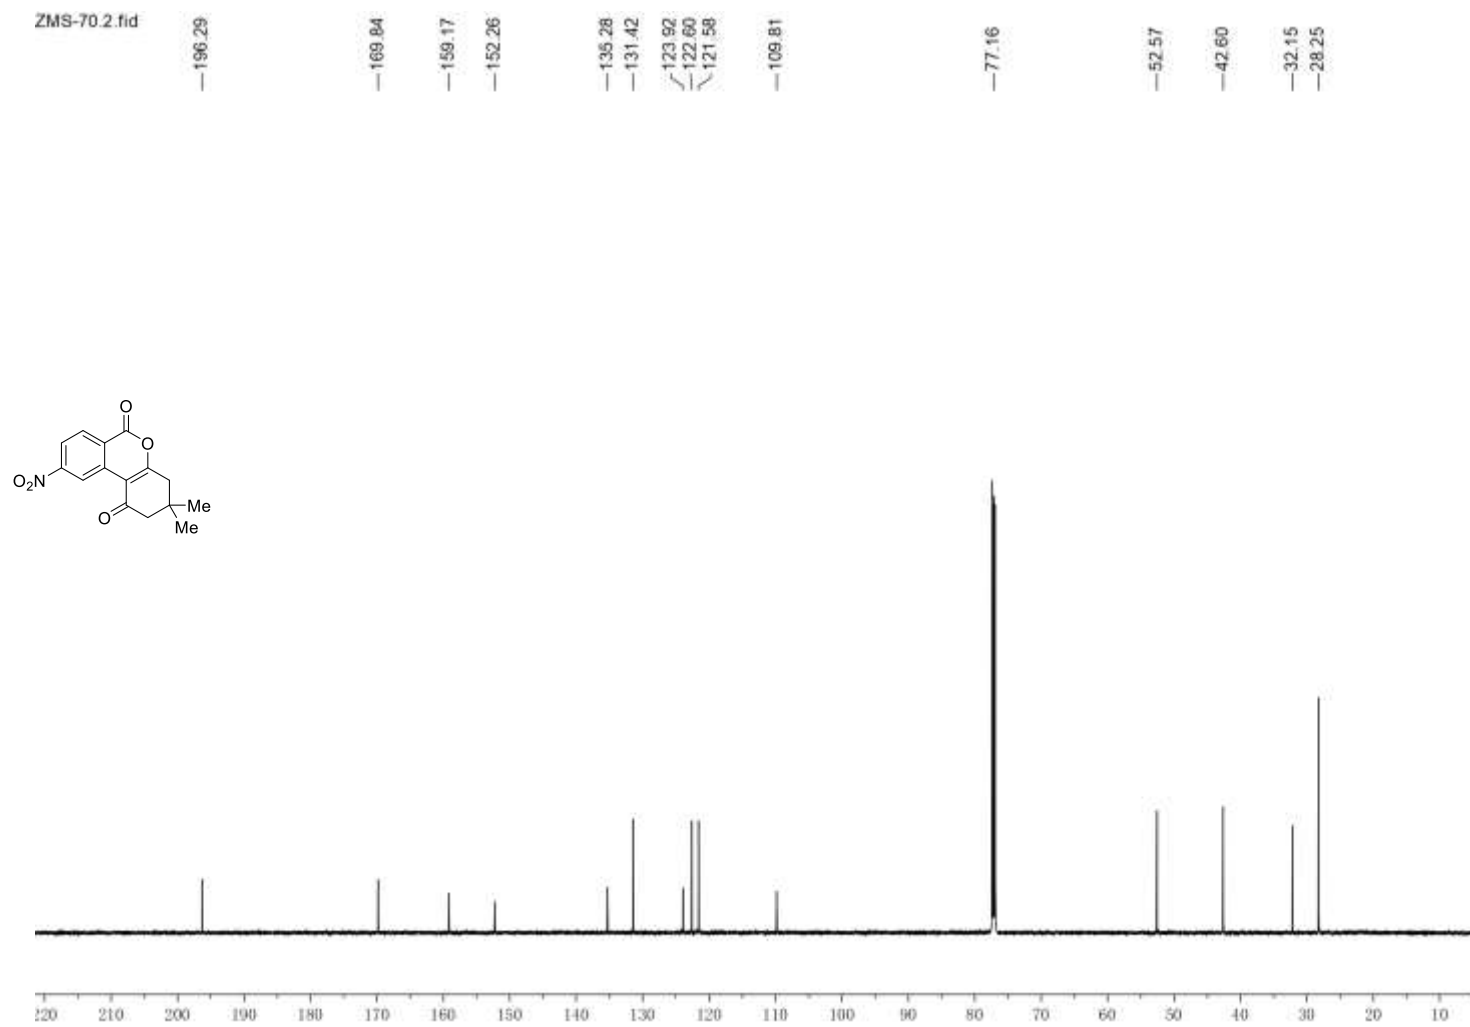

**Figure S25.**  $^{13}\text{C}$  NMR (150 MHz,  $\text{CDCl}_3$ ) spectra of compound **31**

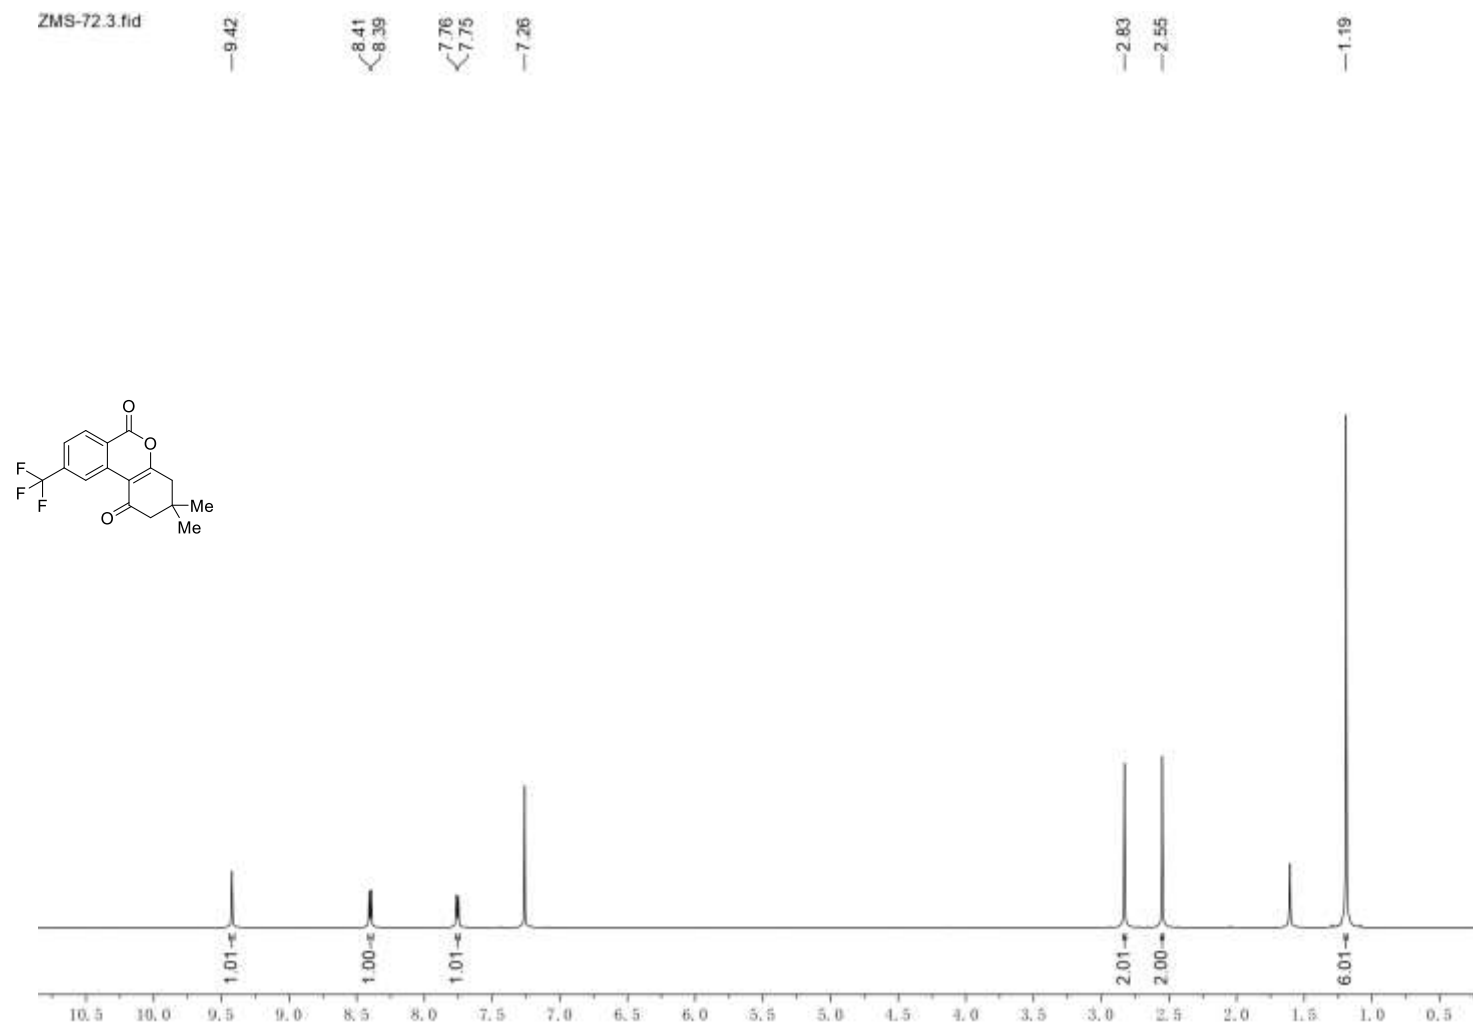

**Figure S26.**  $^1\text{H}$  NMR (600 MHz,  $\text{CDCl}_3$ ) spectra of compound **3m**

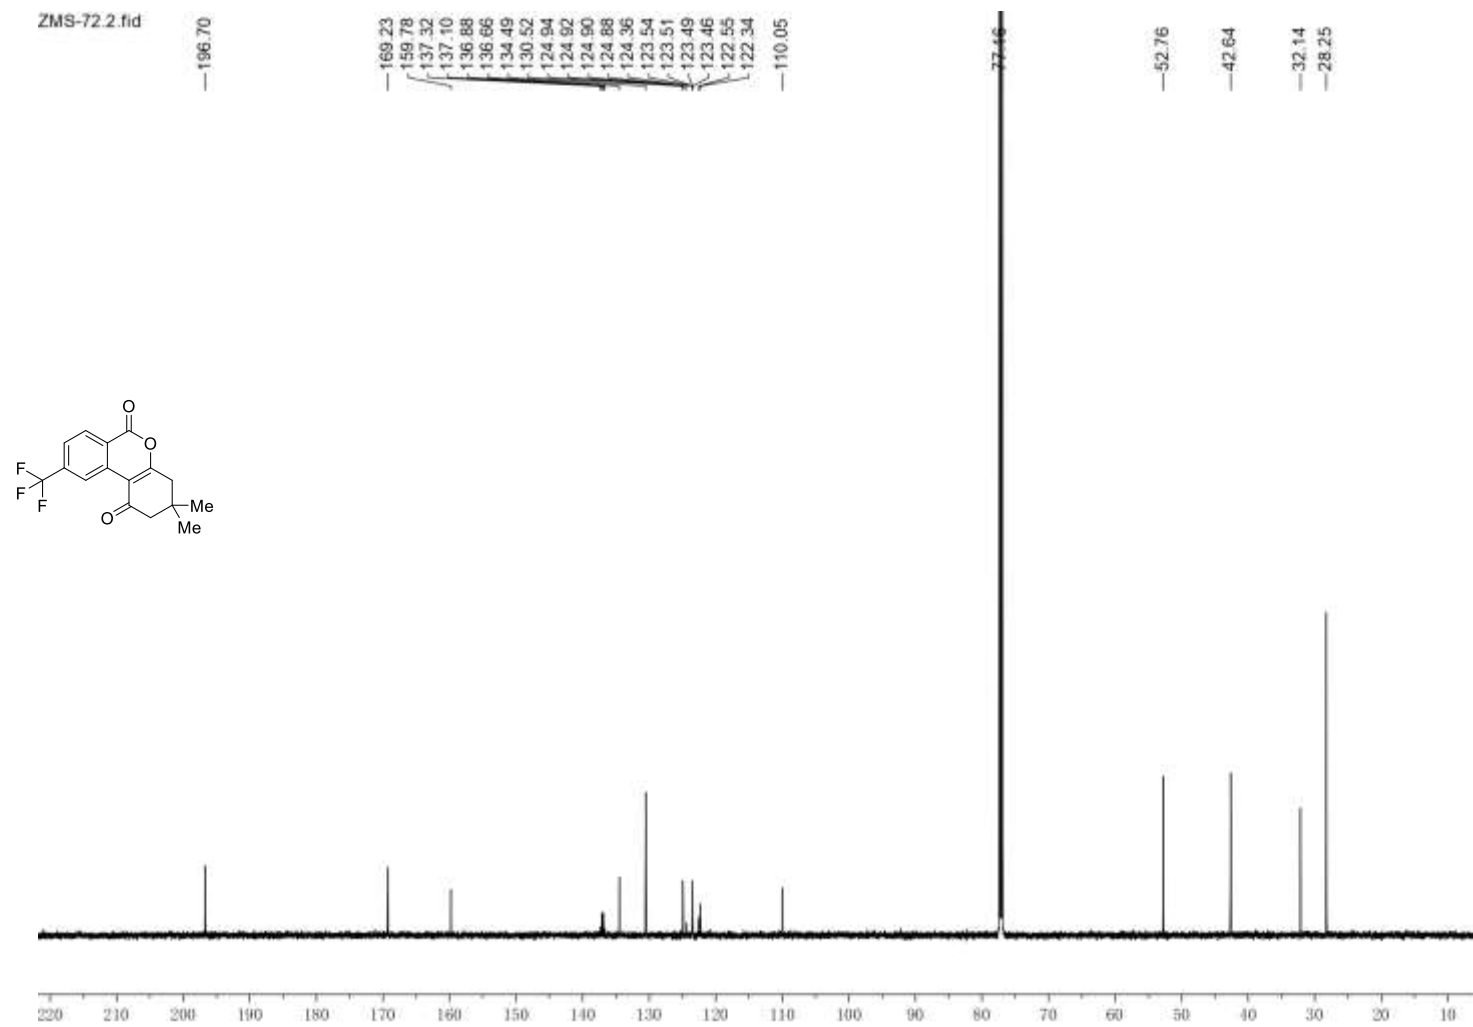

**Figure S27.**  $^{13}\text{C}$  NMR (150 MHz,  $\text{CDCl}_3$ ) spectra of compound **3m**

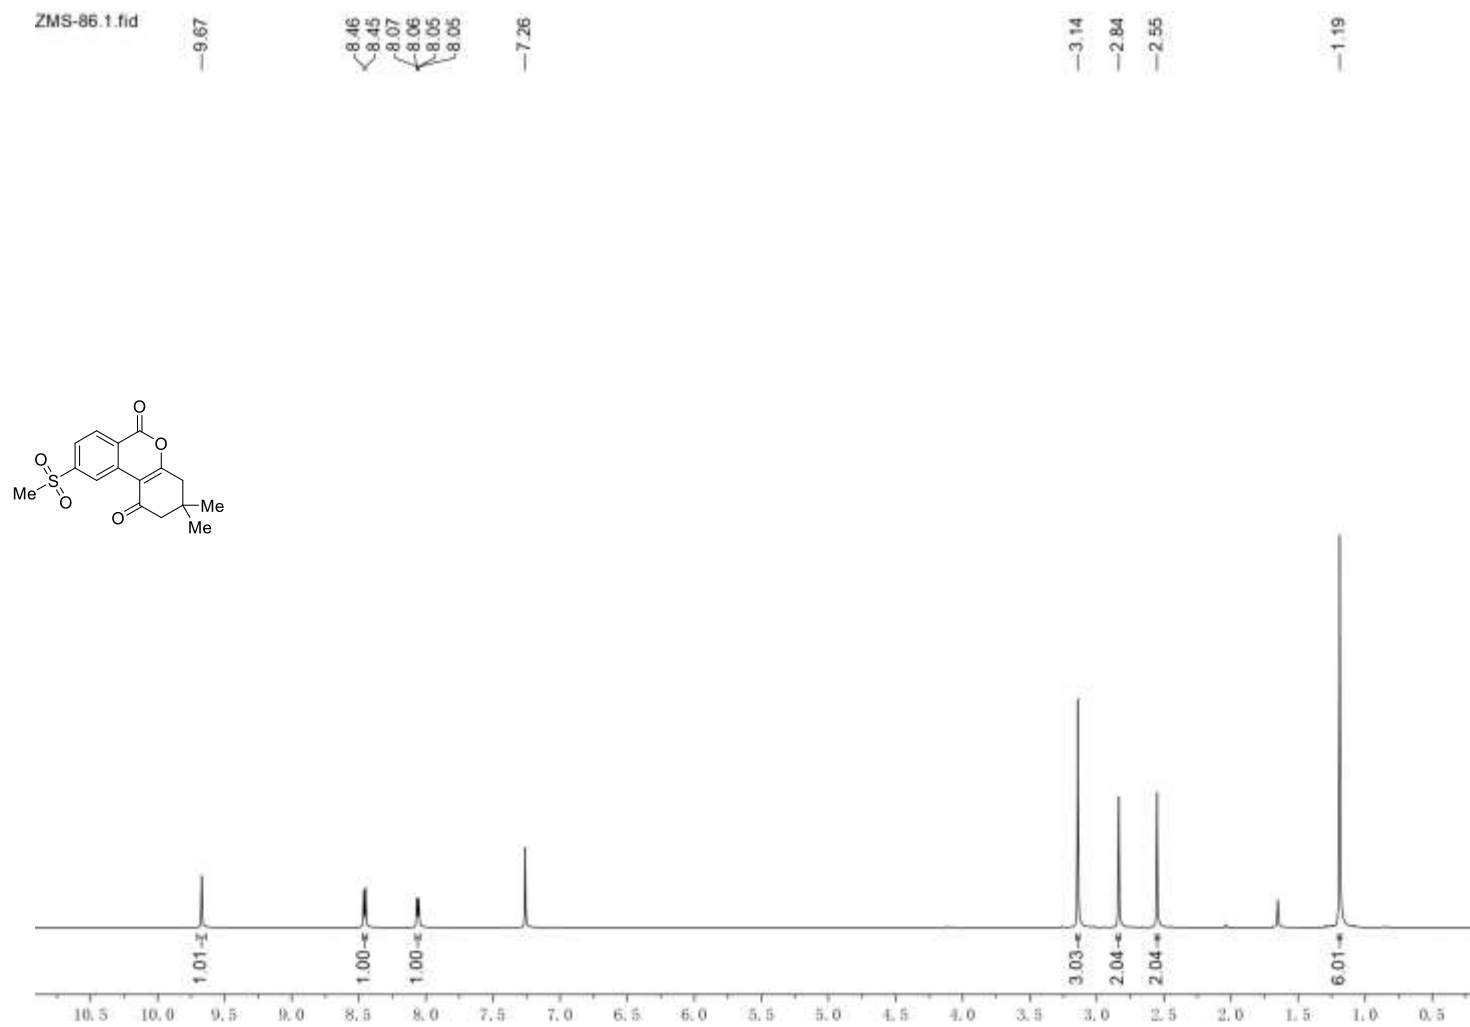

**Figure S28.**  $^1\text{H}$  NMR (600 MHz,  $\text{CDCl}_3$ ) spectra of compound **3n**

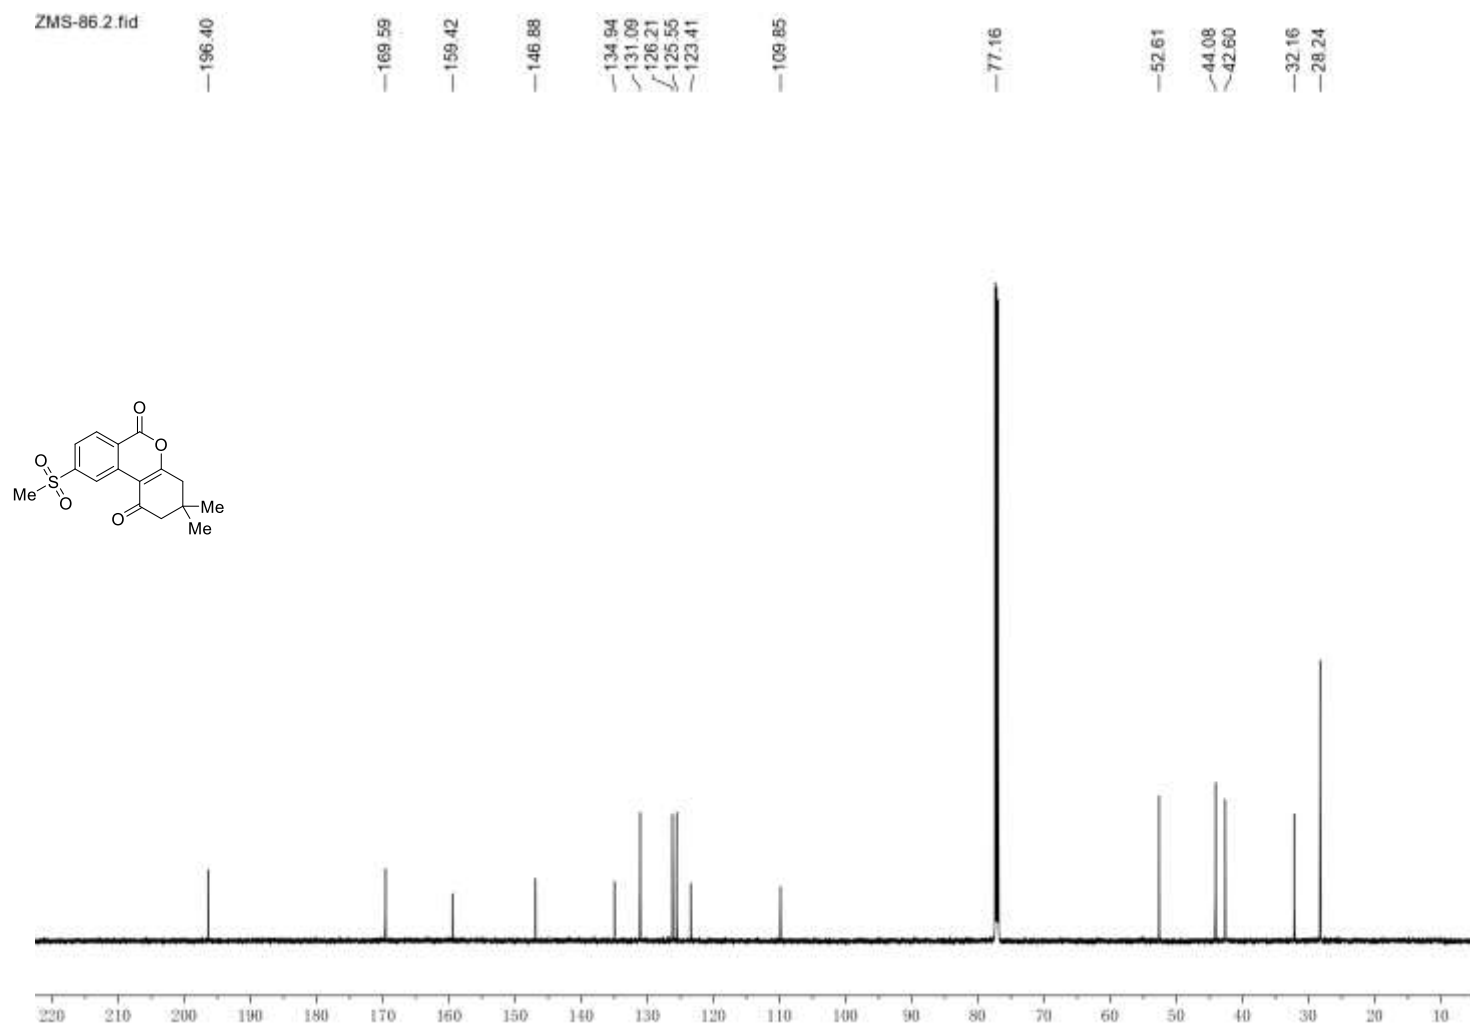

**Figure S29.**  $^{13}\text{C}$  NMR (150 MHz,  $\text{CDCl}_3$ ) spectra of compound **3n**

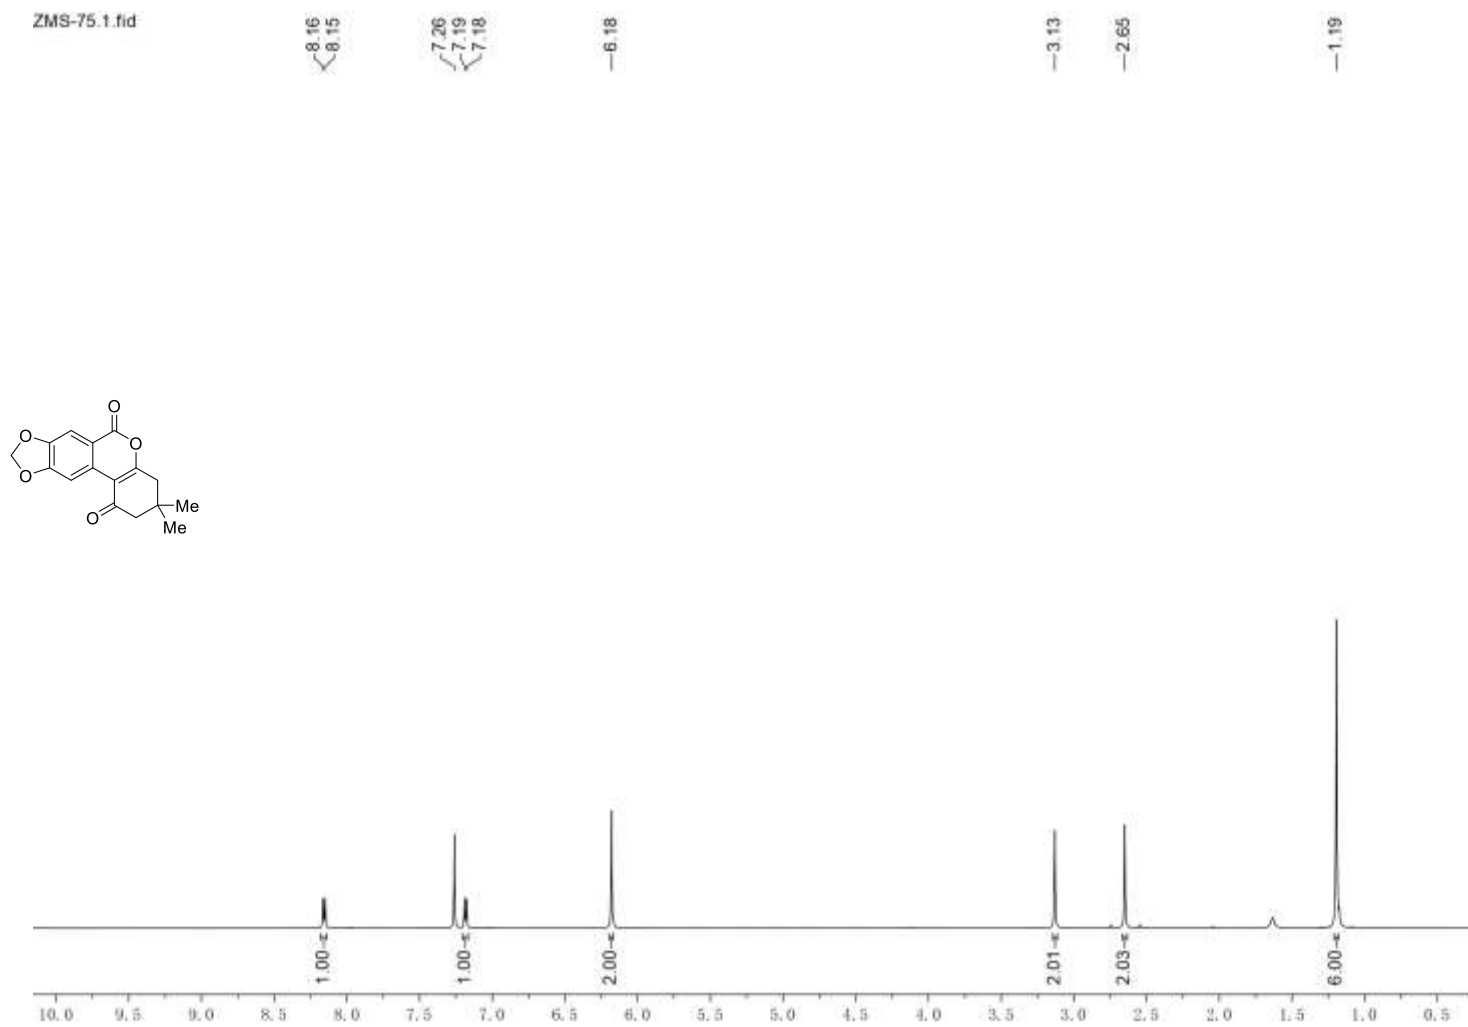

**Figure S30.**  $^1\text{H}$  NMR (600 MHz,  $\text{CDCl}_3$ ) spectra of compound **3o**

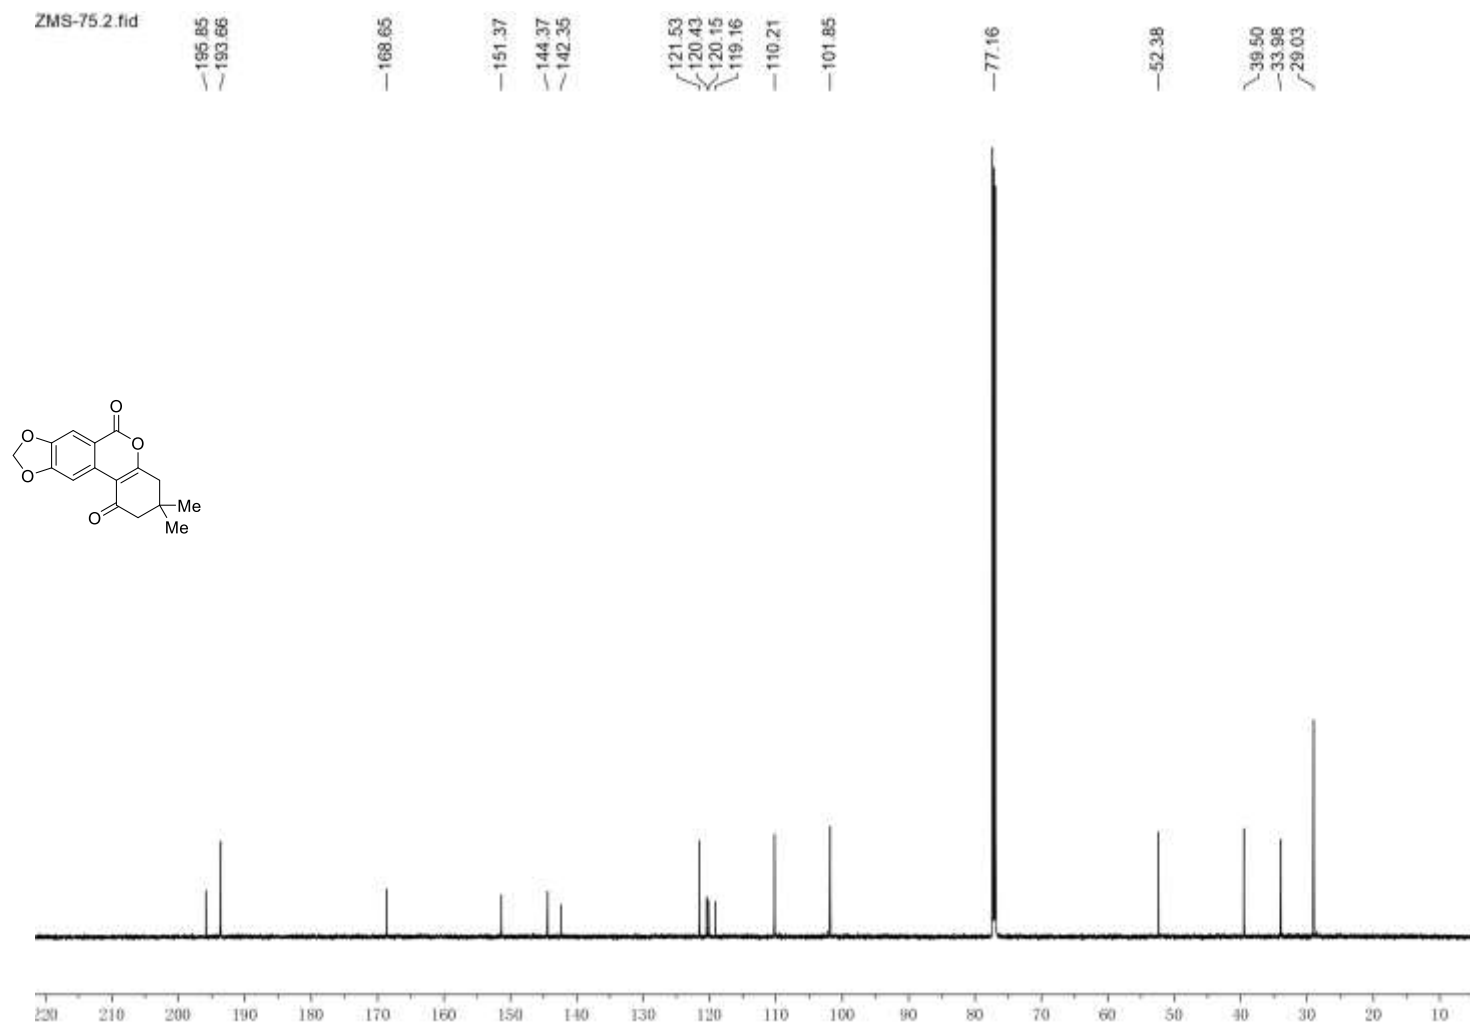

**Figure S31.**  $^{13}\text{C}$  NMR (150 MHz,  $\text{CDCl}_3$ ) spectra of compound **3o**

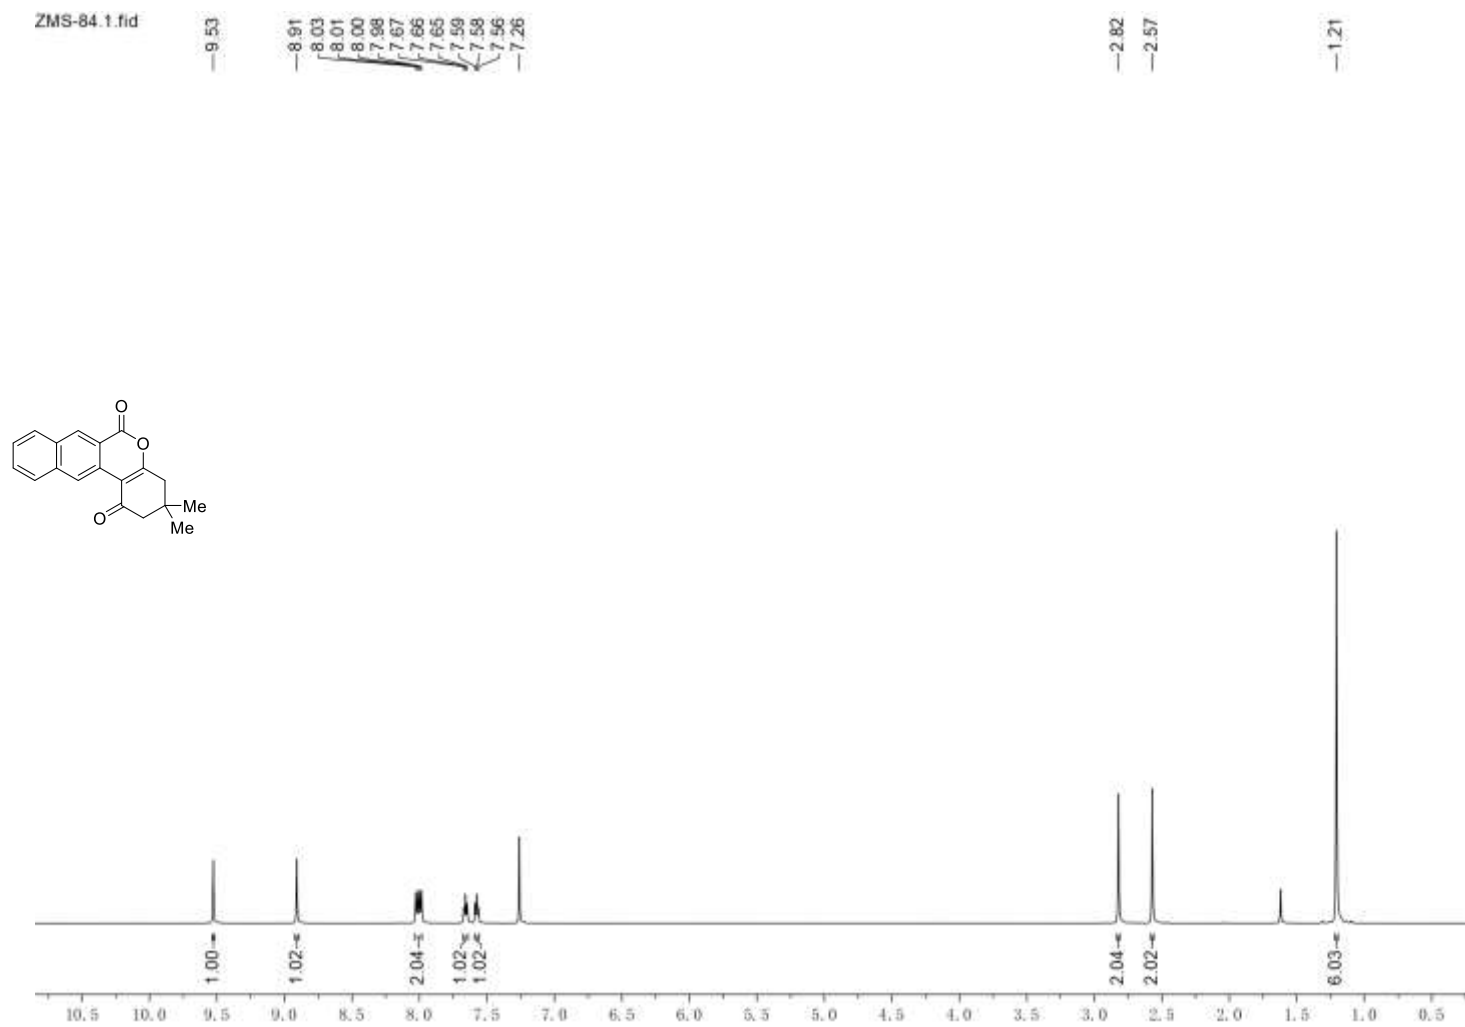

**Figure S32.**  $^1\text{H}$  NMR (600 MHz,  $\text{CDCl}_3$ ) spectra of compound **3p**



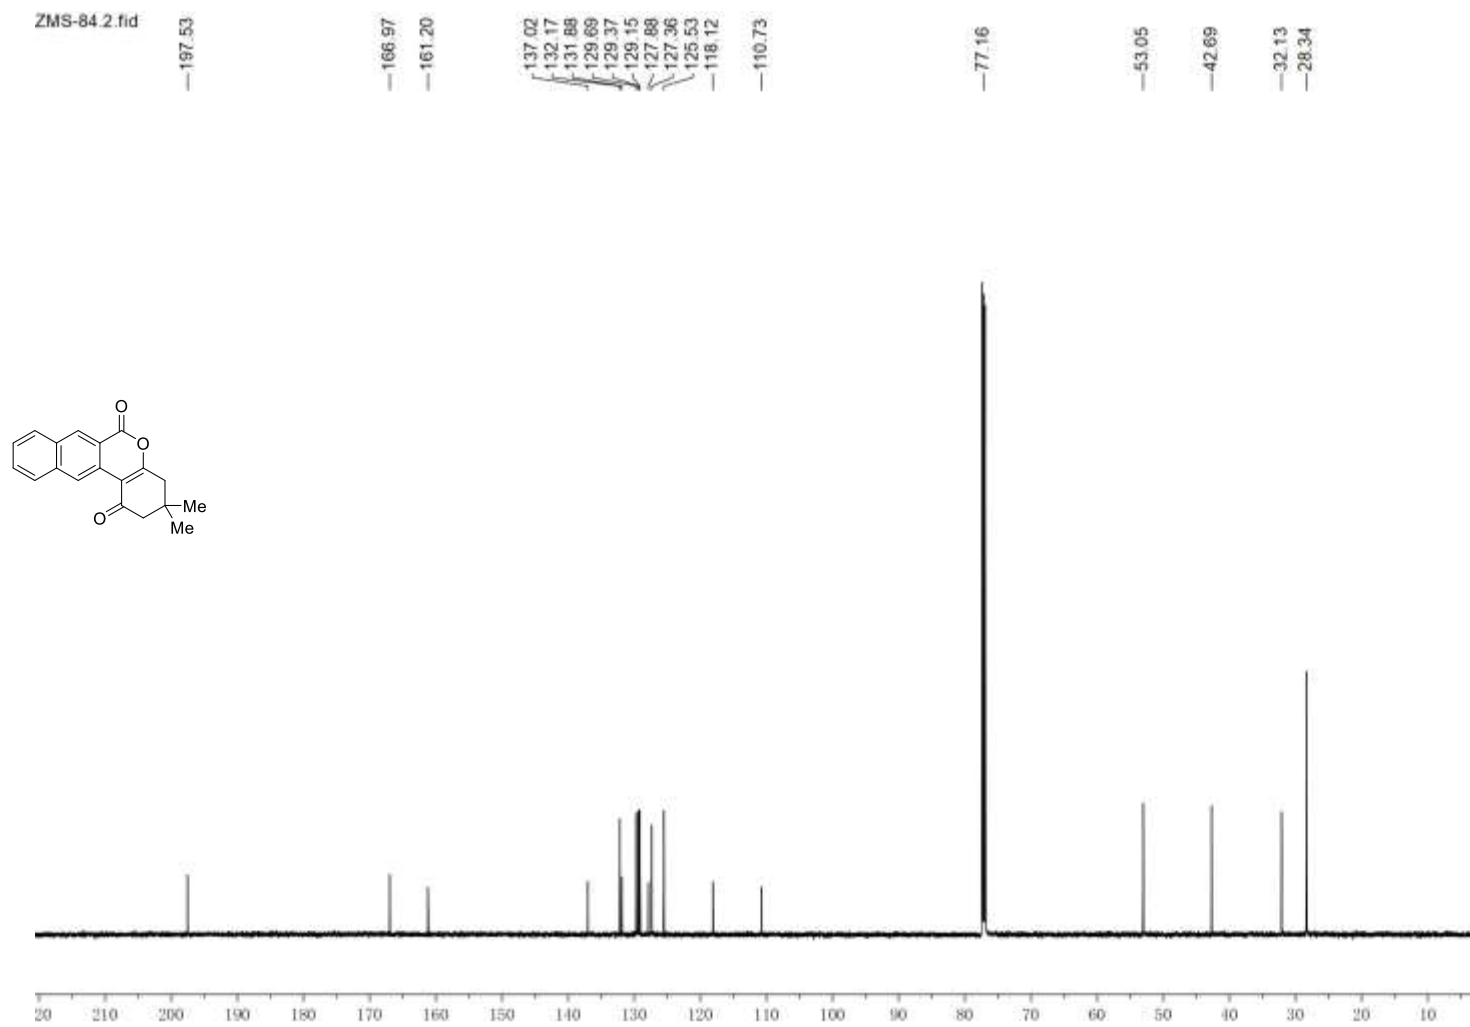

Figure S33.  $^{13}\text{C}$  NMR (150 MHz,  $\text{CDCl}_3$ ) spectra of compound **3p**

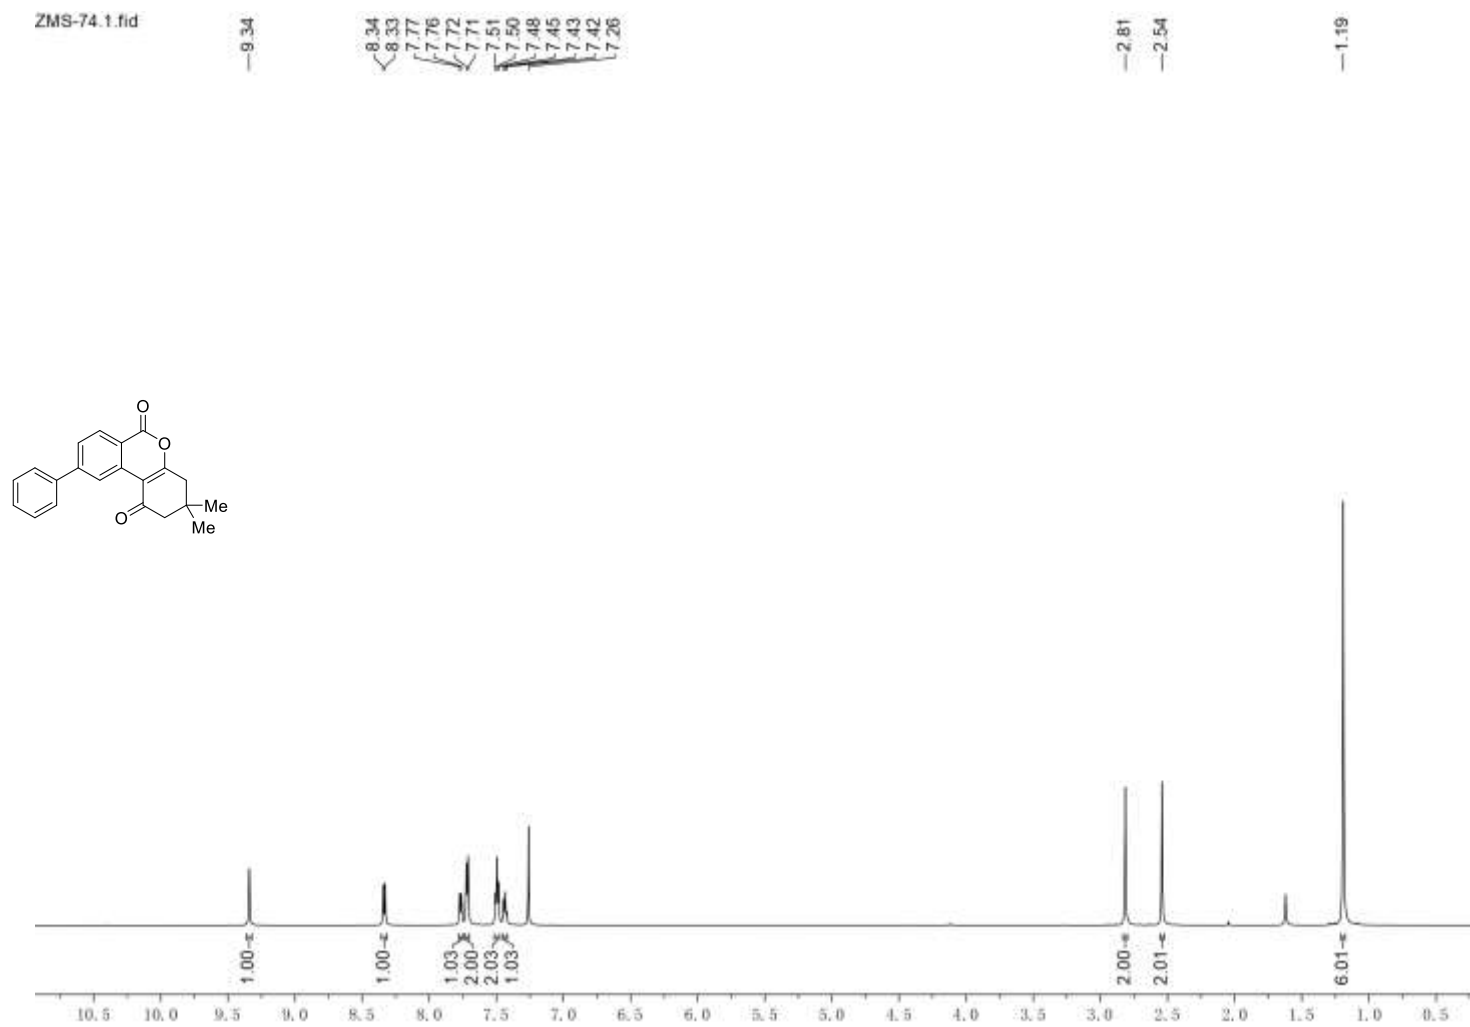

**Figure S34.**  $^1\text{H}$  NMR (600 MHz,  $\text{CDCl}_3$ ) spectra of compound **3q**

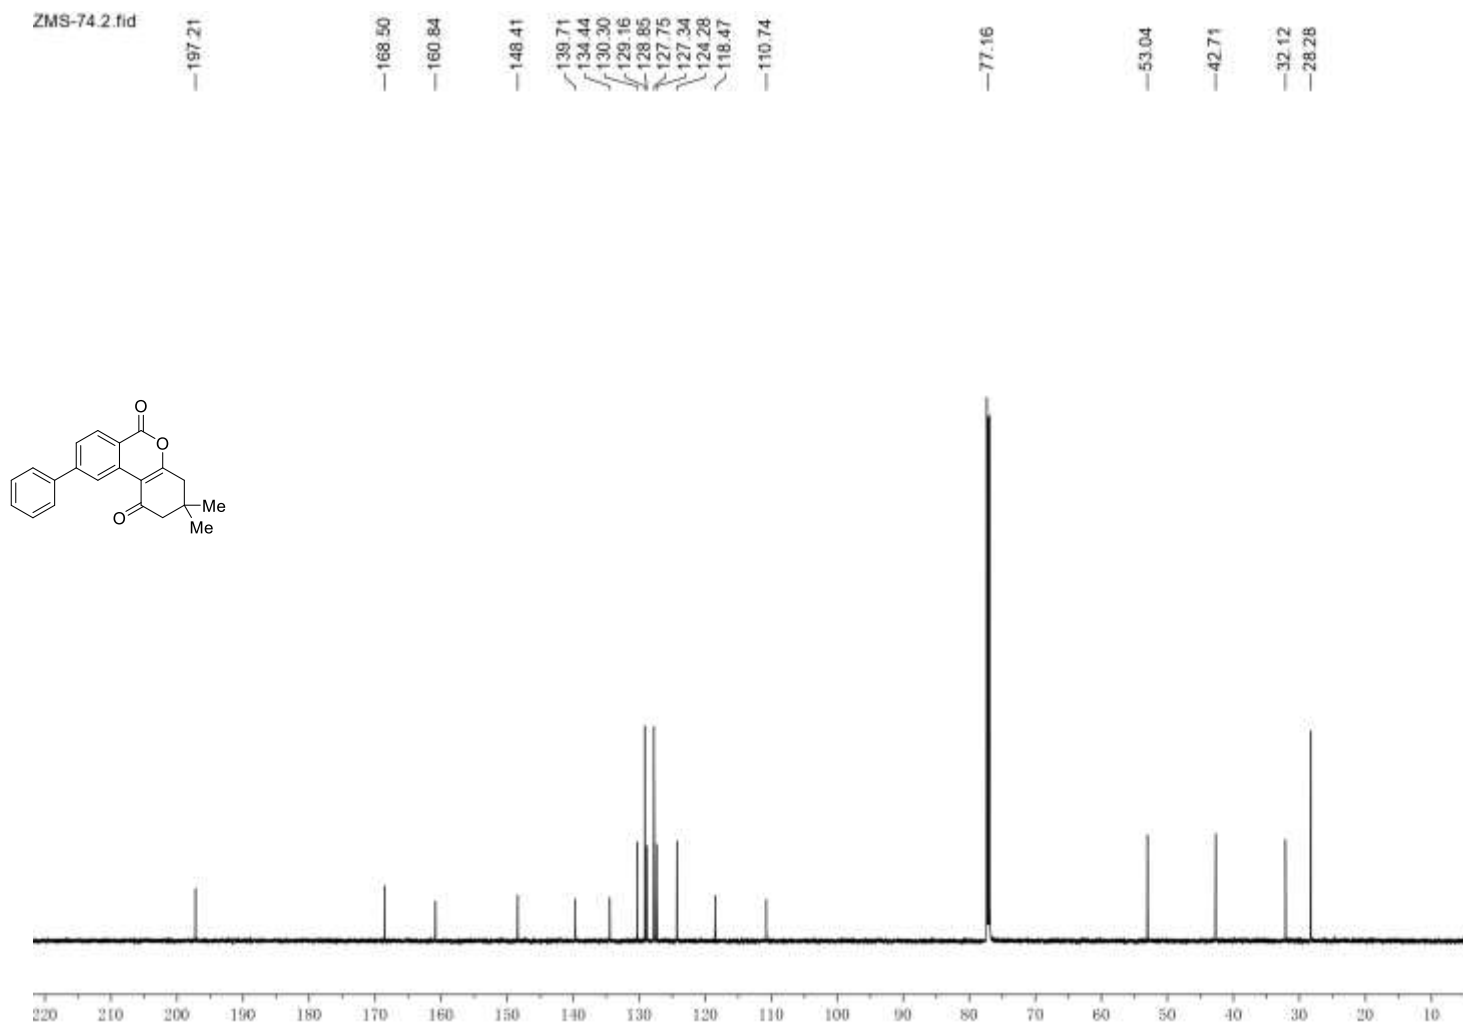

Figure S35.  $^{13}\text{C}$  NMR (150 MHz,  $\text{CDCl}_3$ ) spectra of compound **3q**

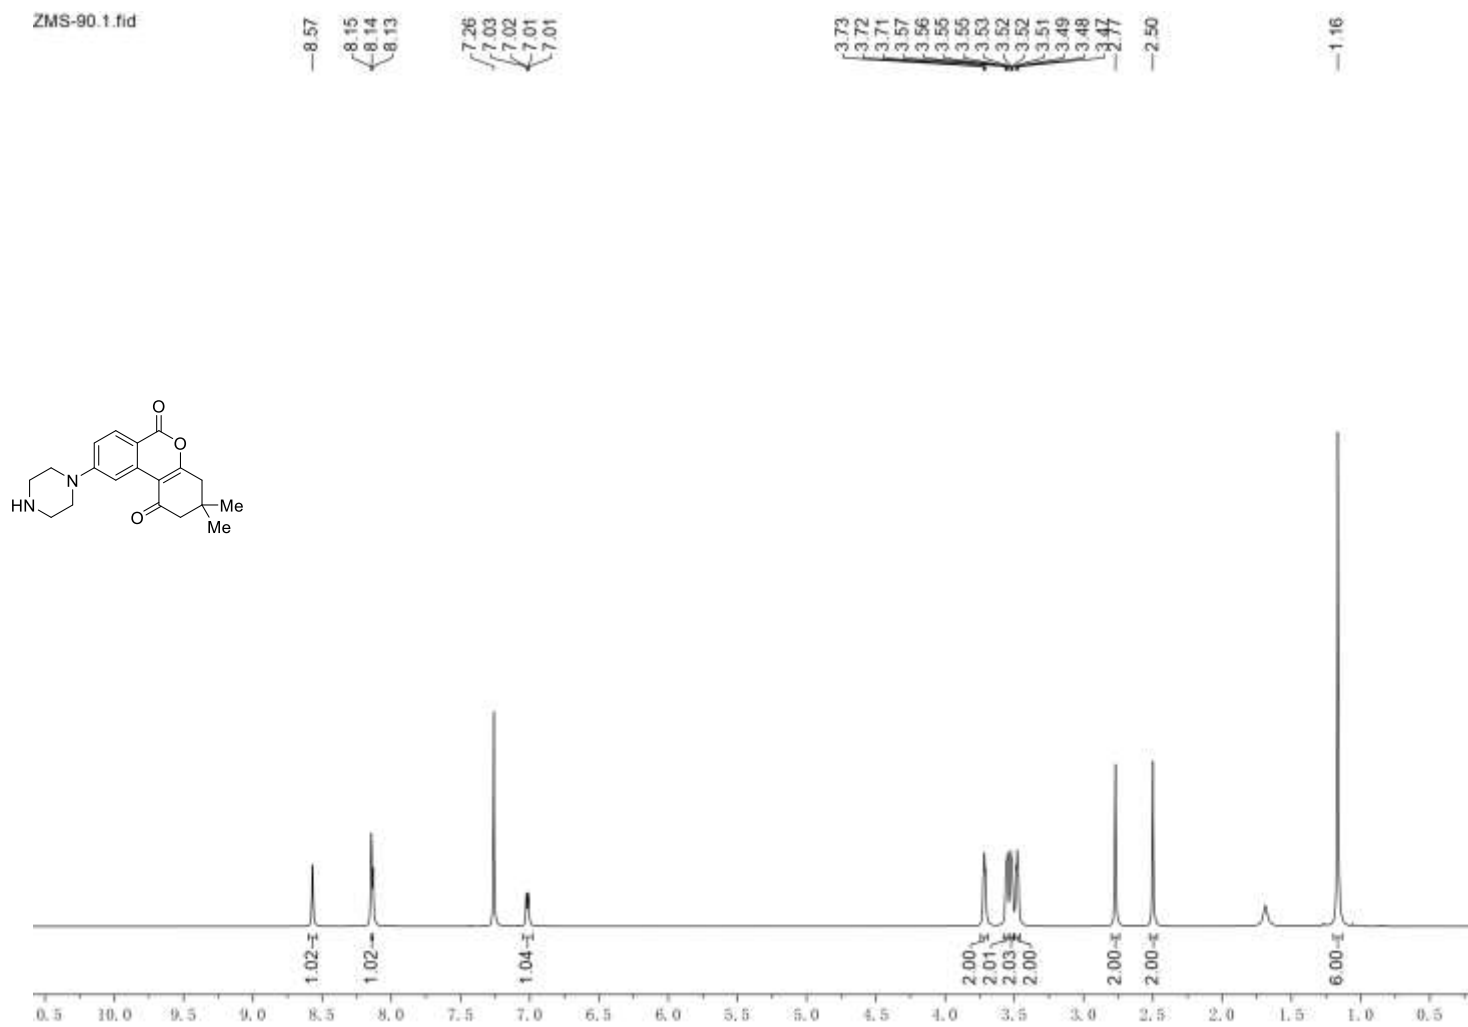

**Figure S36.**  $^1\text{H}$  NMR (600 MHz,  $\text{CDCl}_3$ ) spectra of compound **3r**

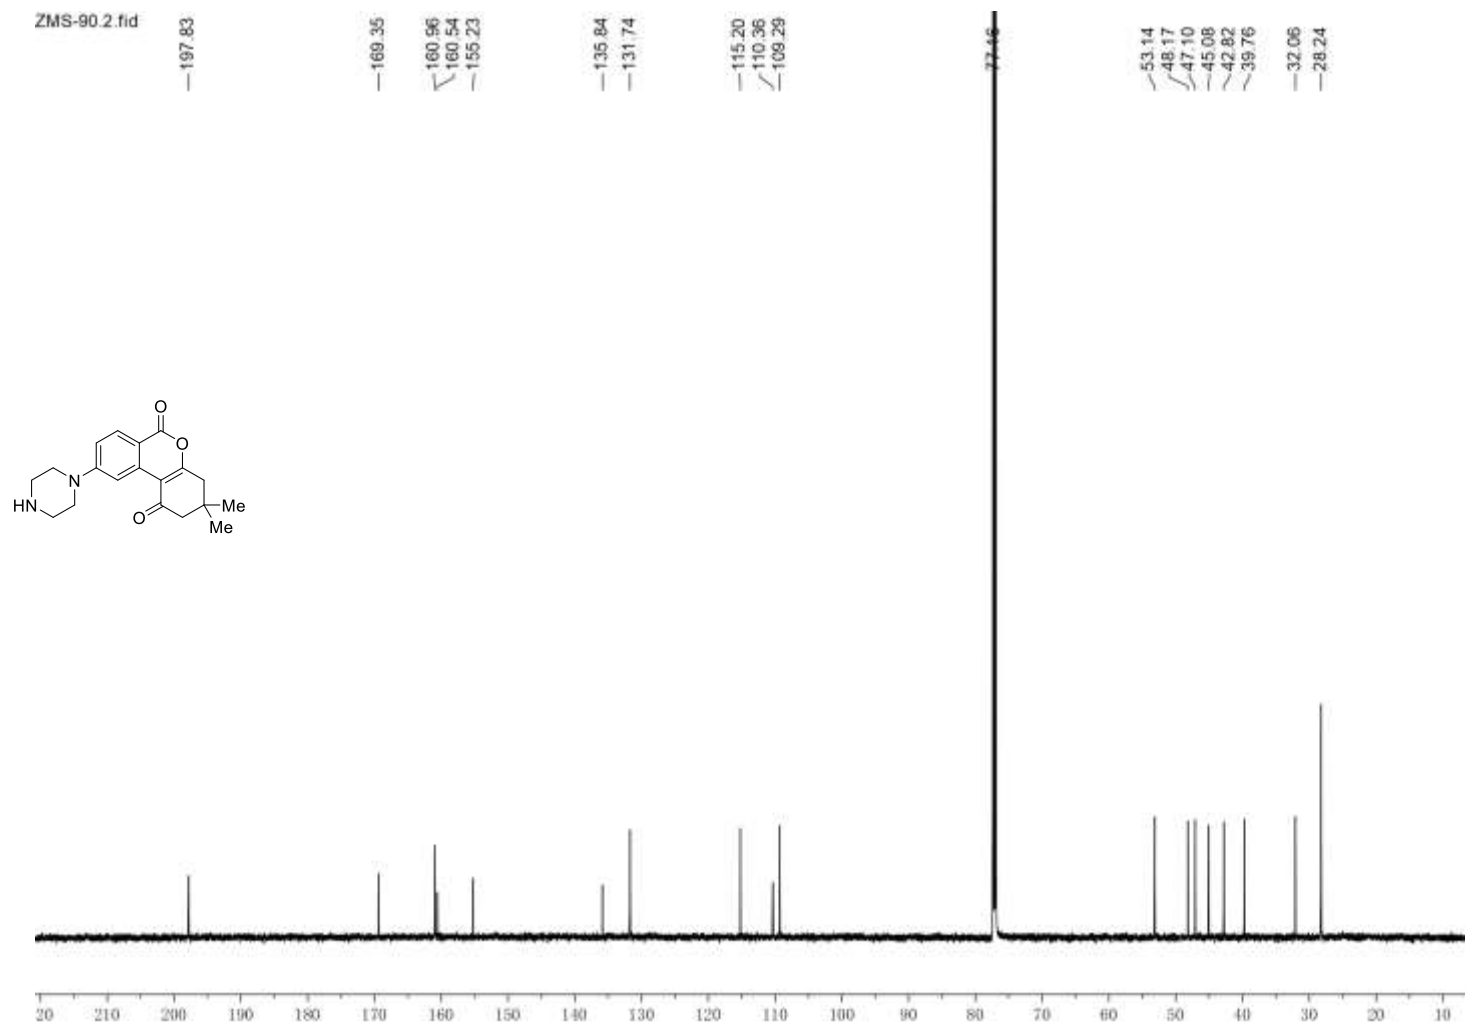

**Figure S37.**  $^{13}\text{C}$  NMR (150 MHz,  $\text{CDCl}_3$ ) spectra of compound **3r**

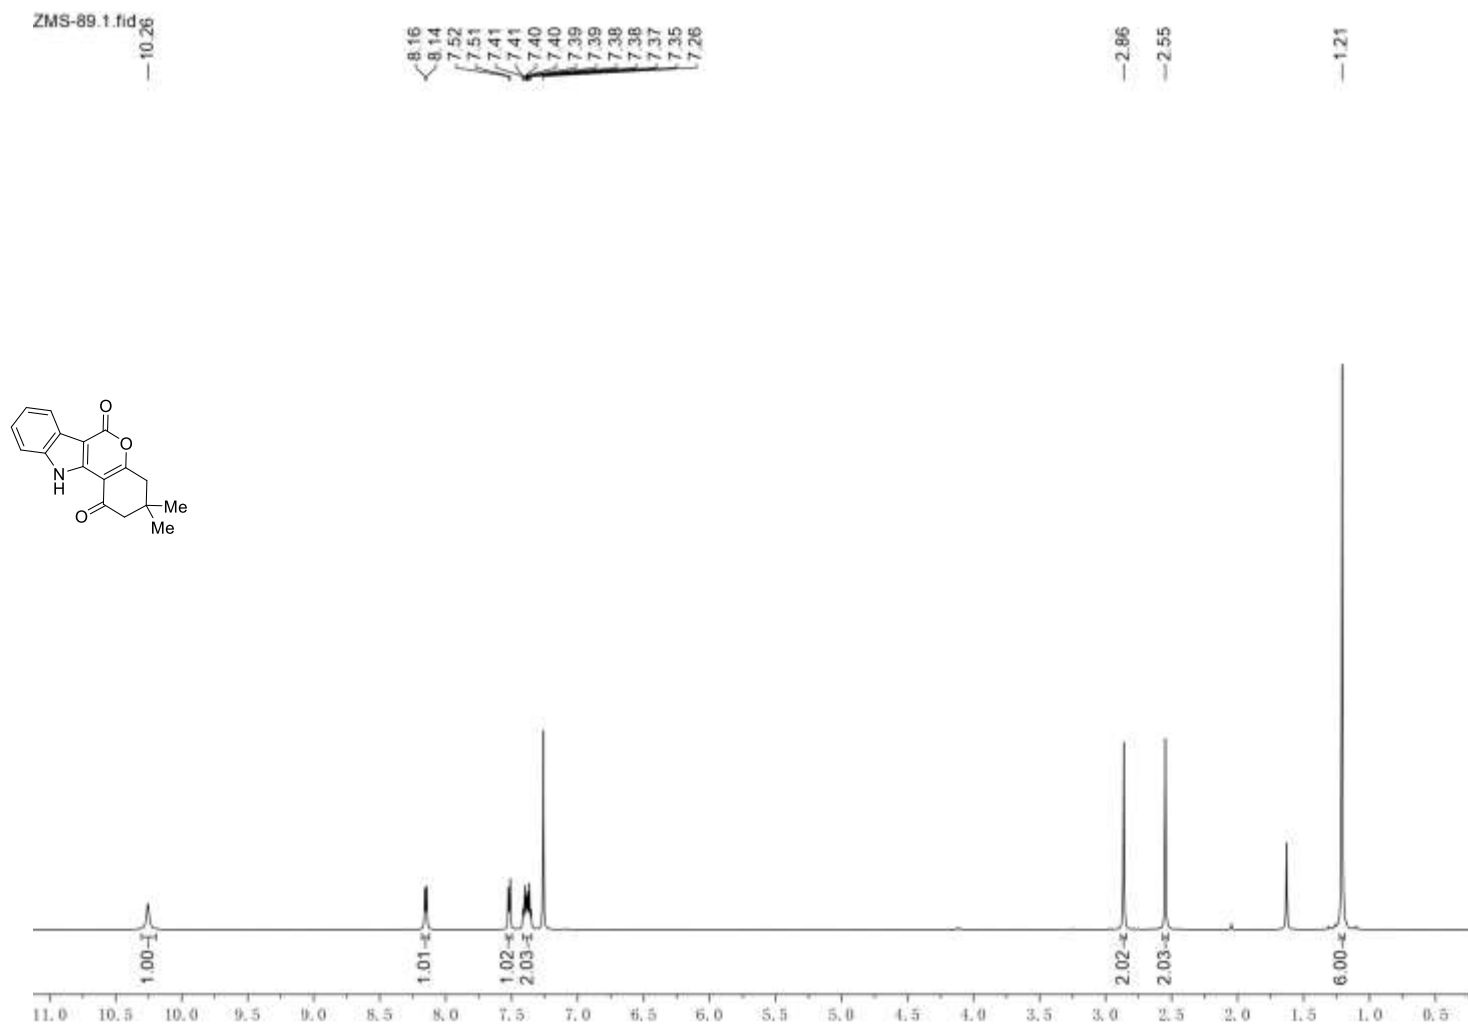

Figure S38.  $^1\text{H}$  NMR (600 MHz,  $\text{CDCl}_3$ ) spectra of compound 3s

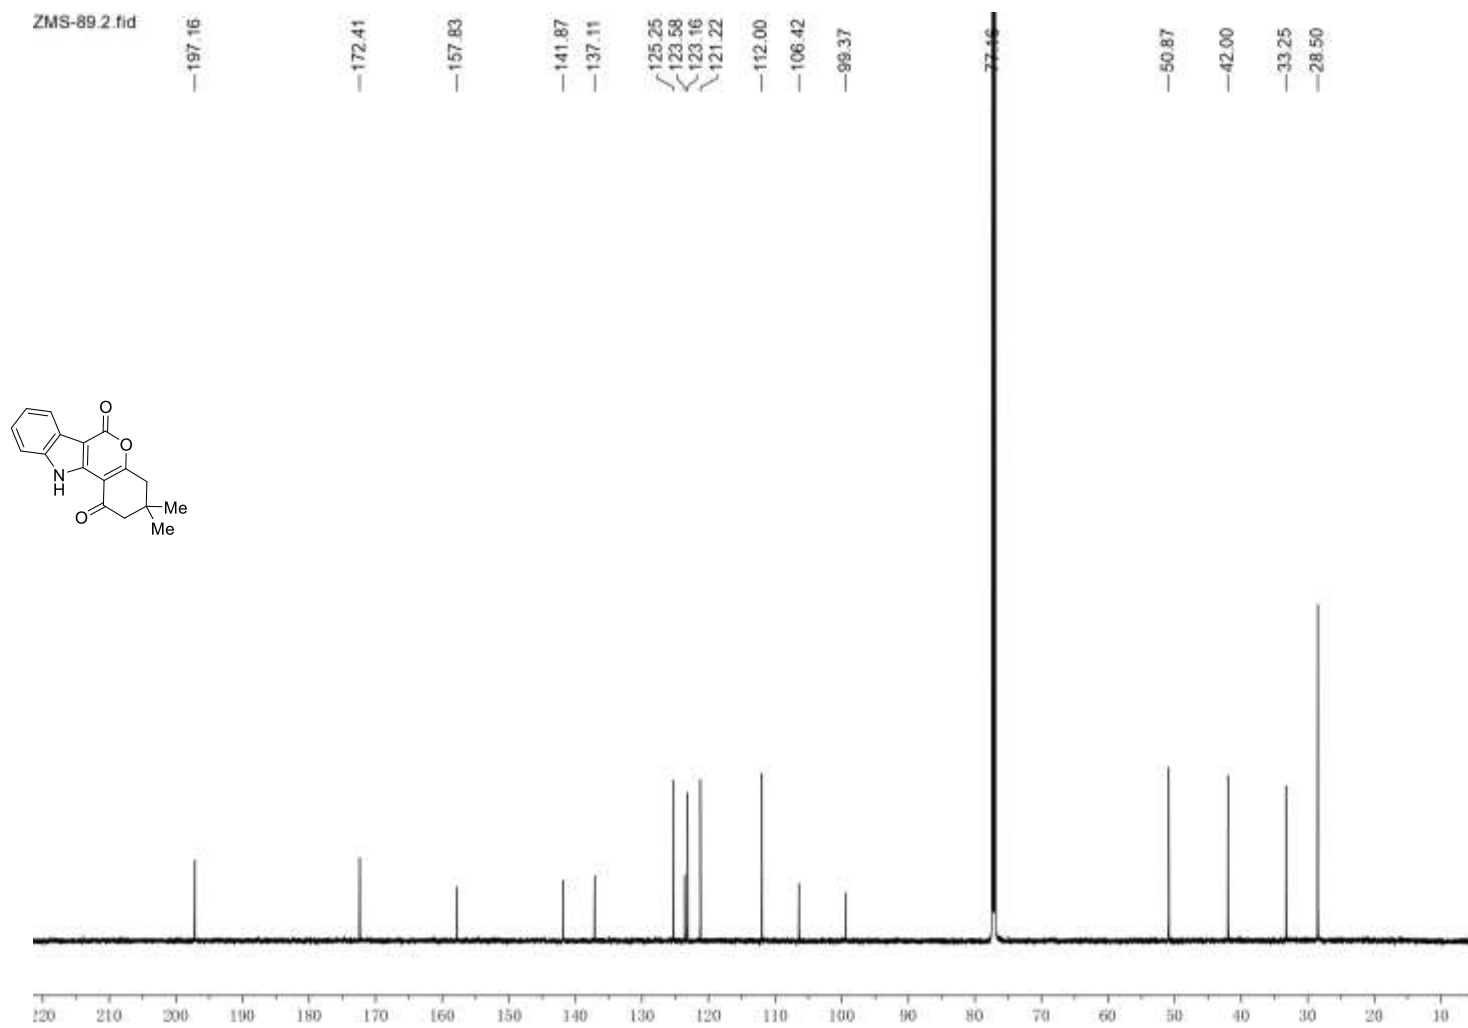

**Figure S39.**  $^{13}\text{C}$  NMR (150 MHz,  $\text{CDCl}_3$ ) spectra of compound **3s**

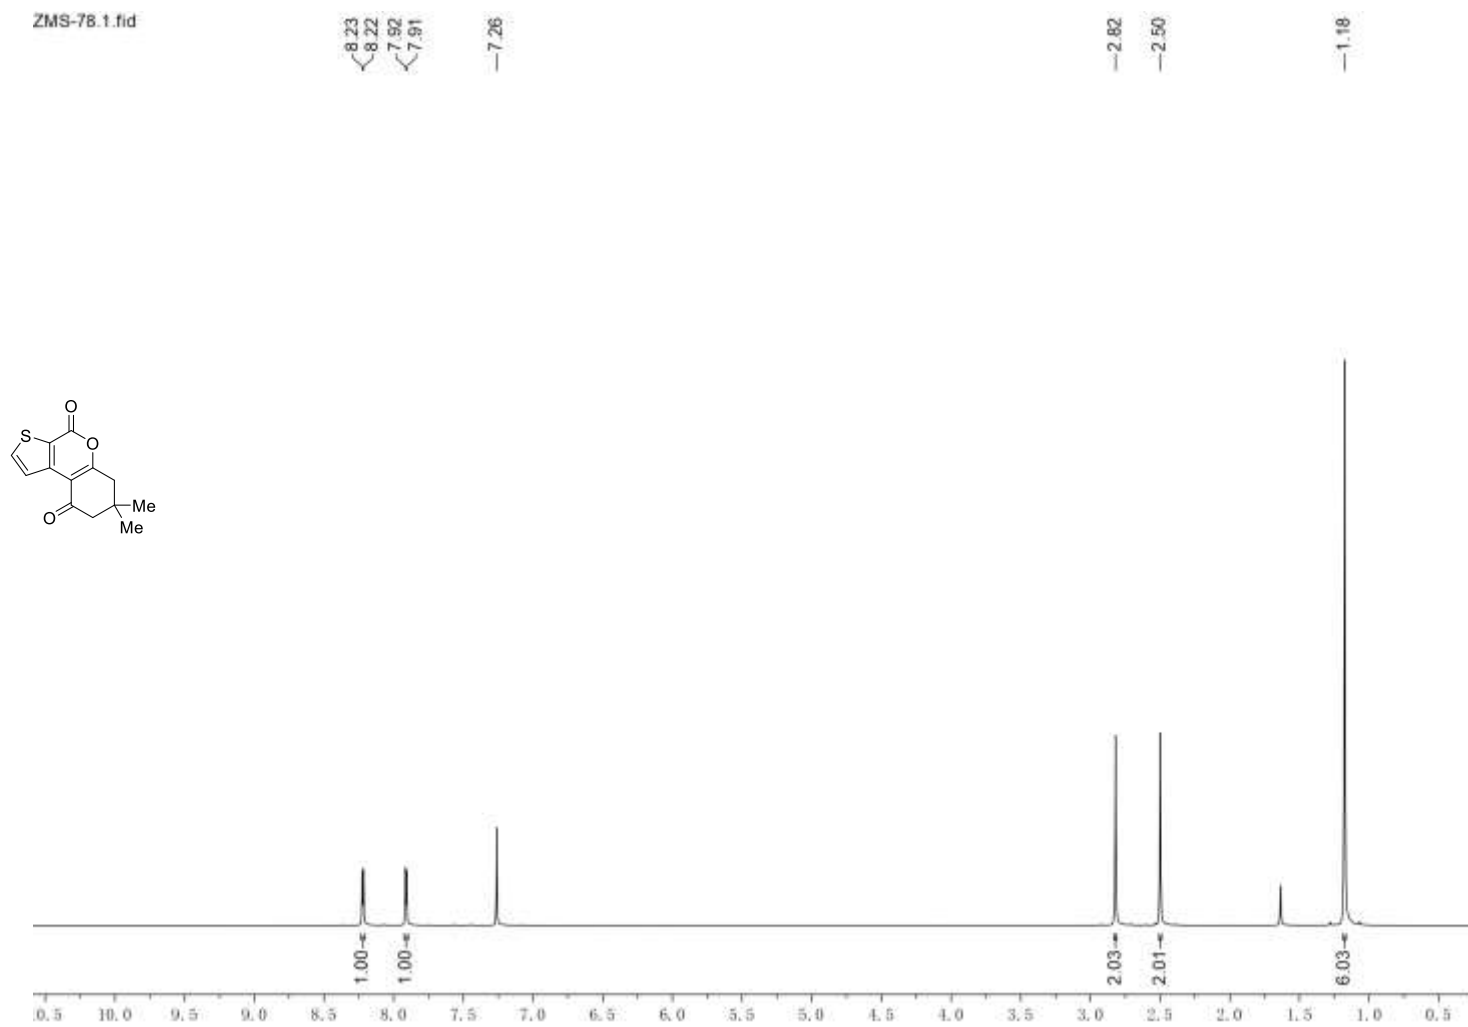

Figure S40.  $^1\text{H}$  NMR (600 MHz,  $\text{CDCl}_3$ ) spectra of compound **3t**



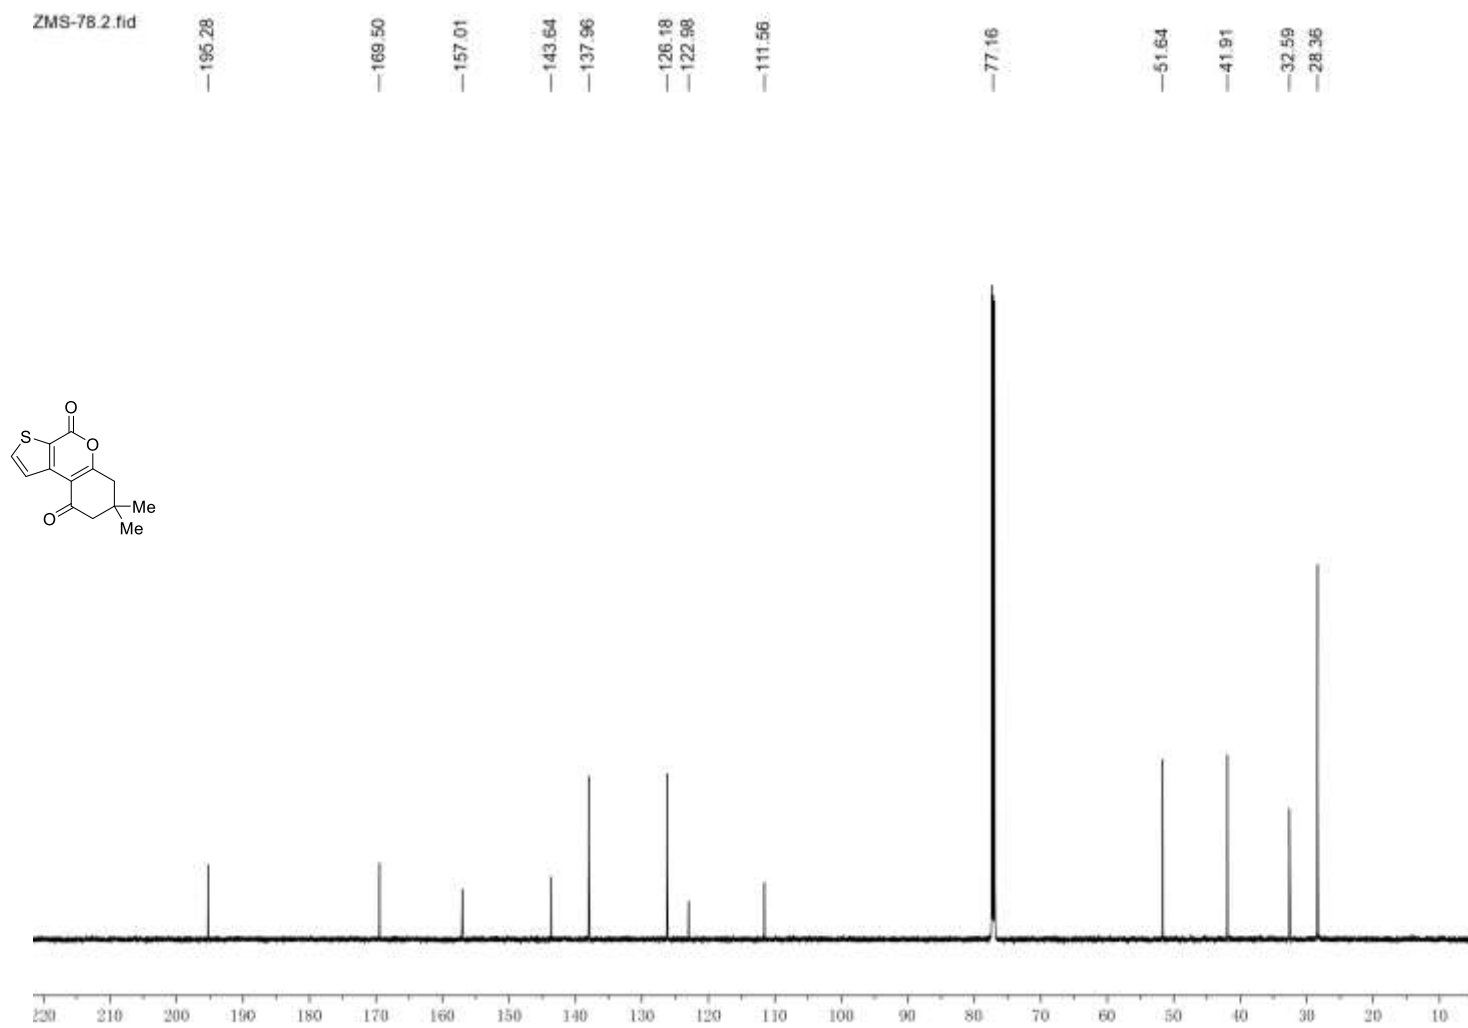

**Figure S41.**  $^{13}\text{C}$  NMR (150 MHz,  $\text{CDCl}_3$ ) spectra of compound **3t**

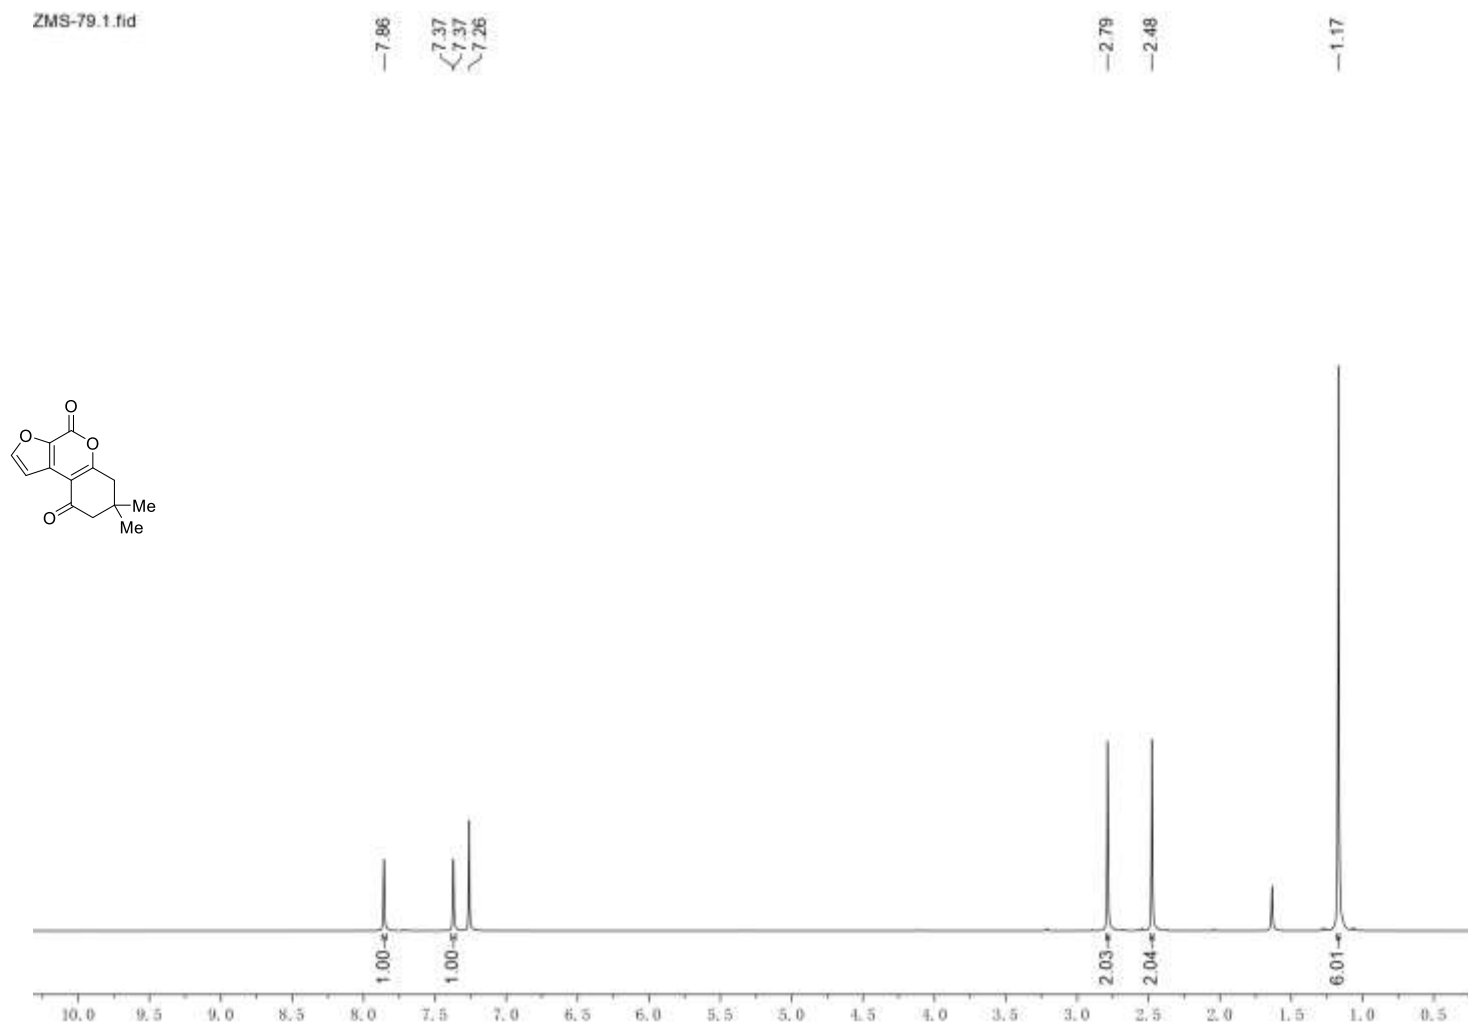

**Figure S42.**  $^1\text{H}$  NMR (600 MHz,  $\text{CDCl}_3$ ) spectra of compound **3u**

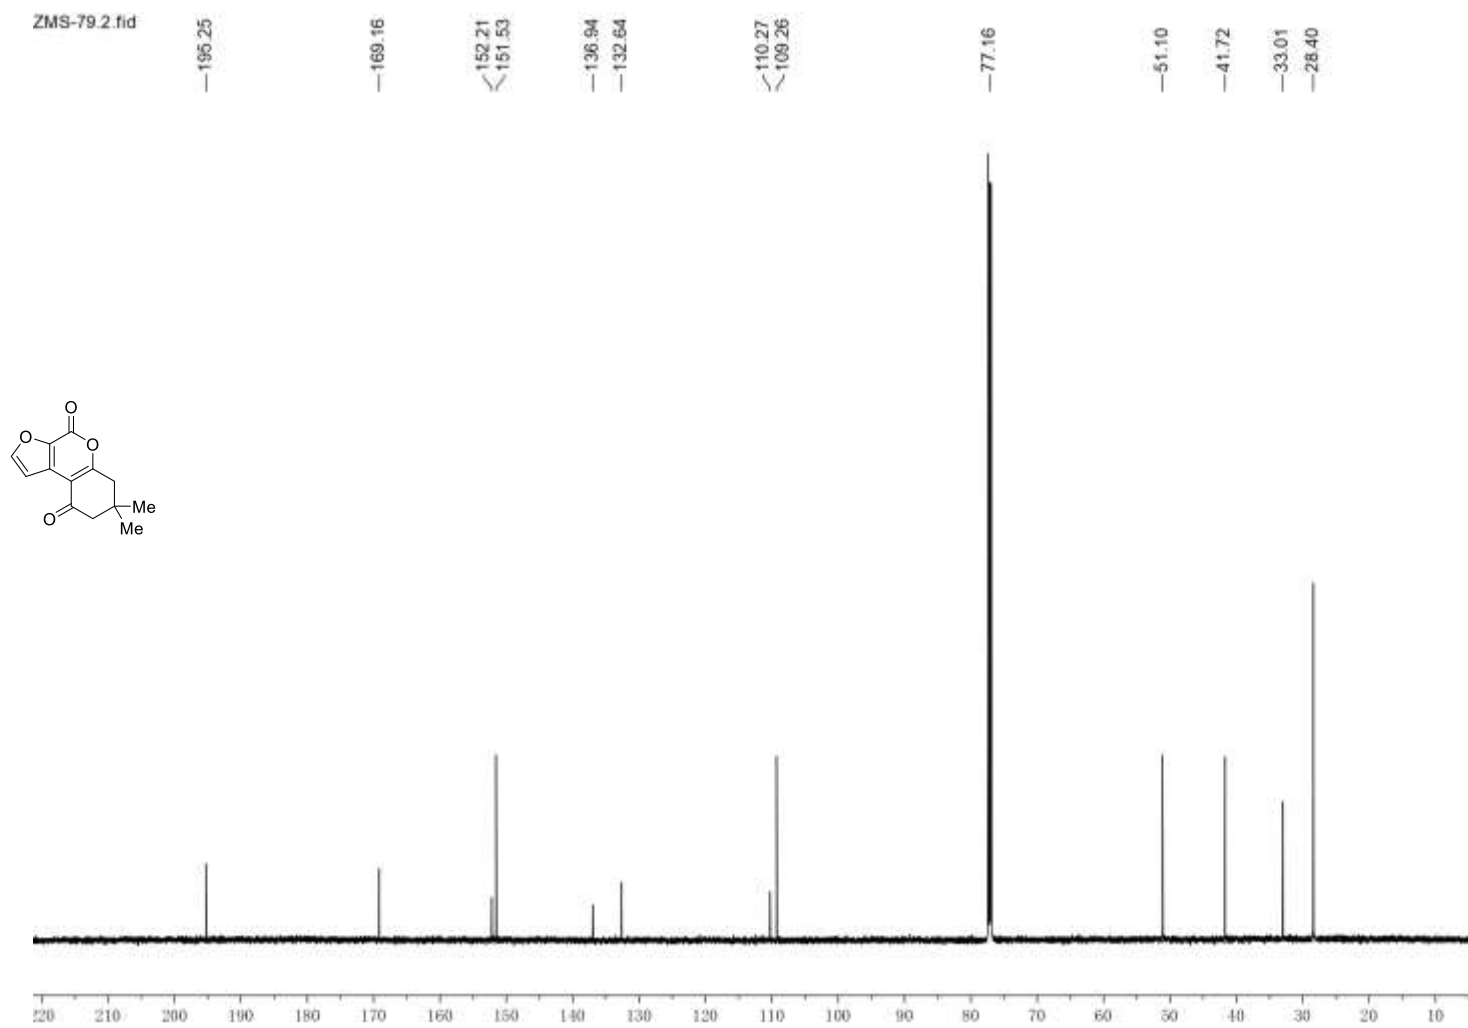

**Figure S43.**  $^{13}\text{C}$  NMR (150 MHz,  $\text{CDCl}_3$ ) spectra of compound **3u**

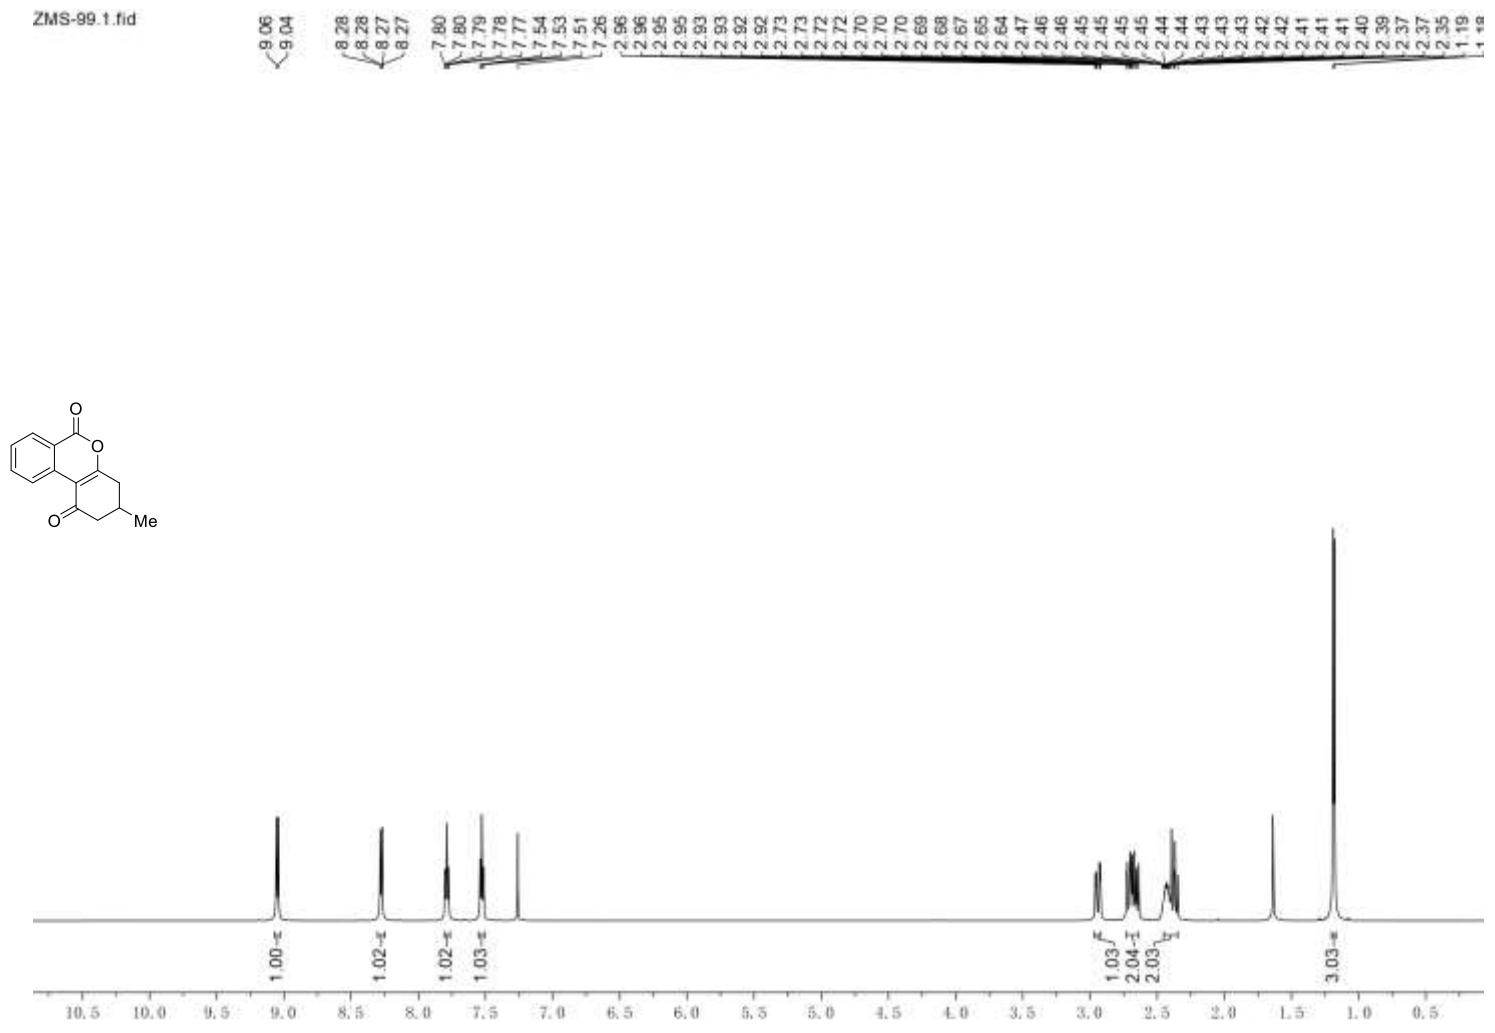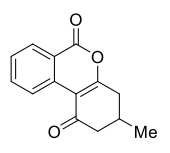

Figure S44. <sup>1</sup>H NMR (600 MHz, CDCl<sub>3</sub>) spectra of compound 3x

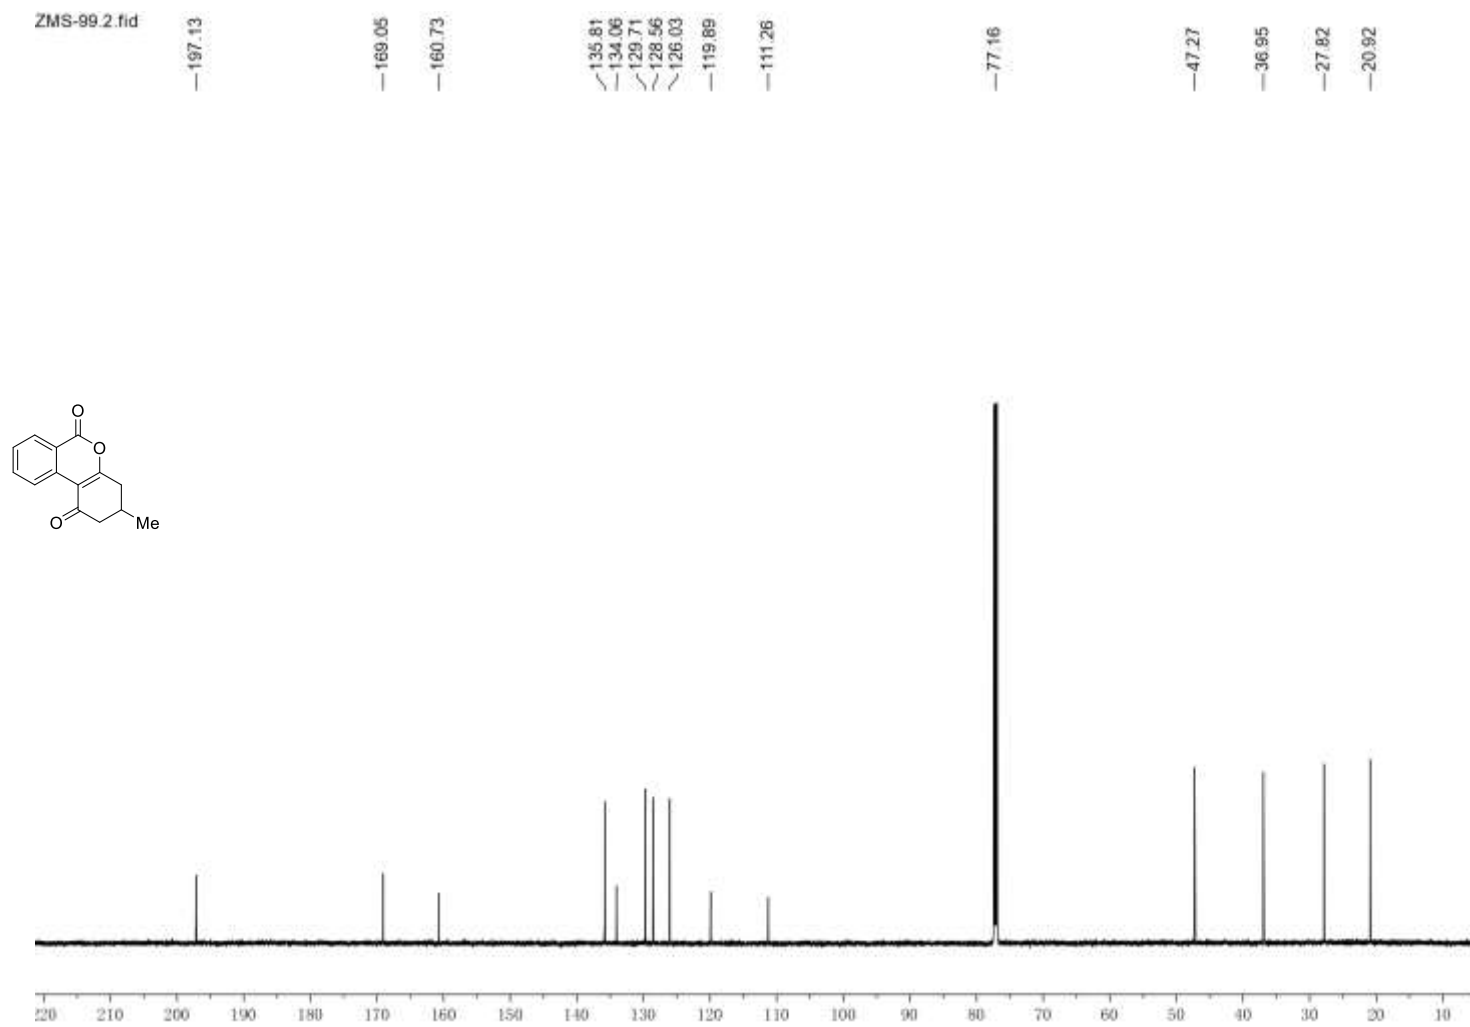

**Figure S45.**  $^{13}\text{C}$  NMR (150 MHz,  $\text{CDCl}_3$ ) spectra of compound **3x**

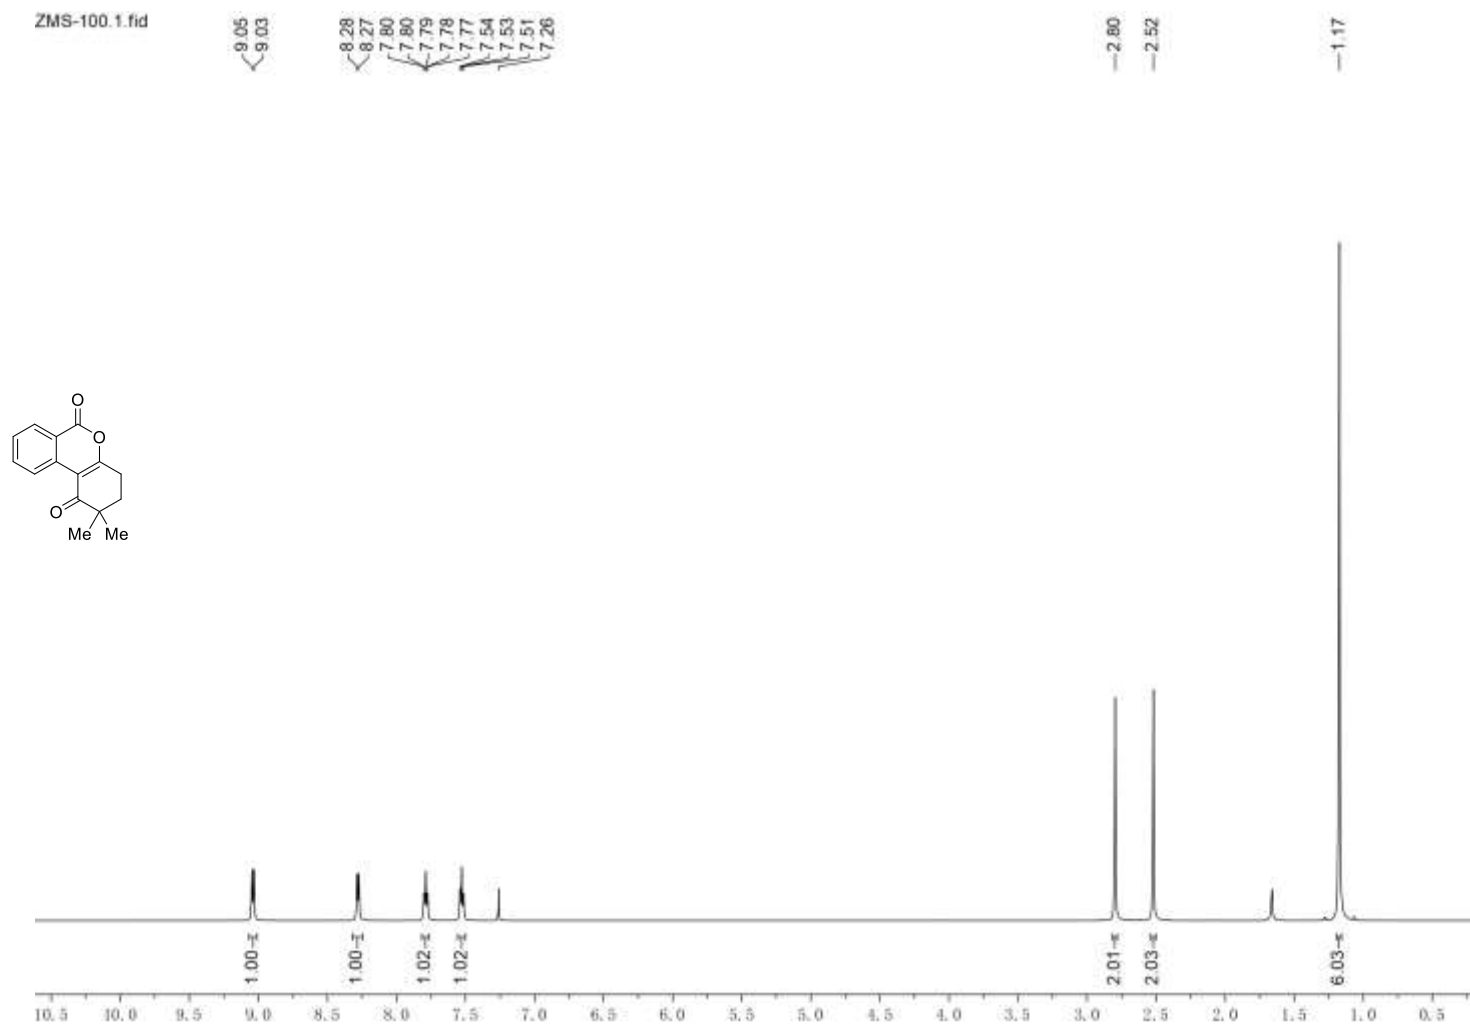

**Figure S46.**  $^1\text{H}$  NMR (600 MHz,  $\text{CDCl}_3$ ) spectra of compound **3y**

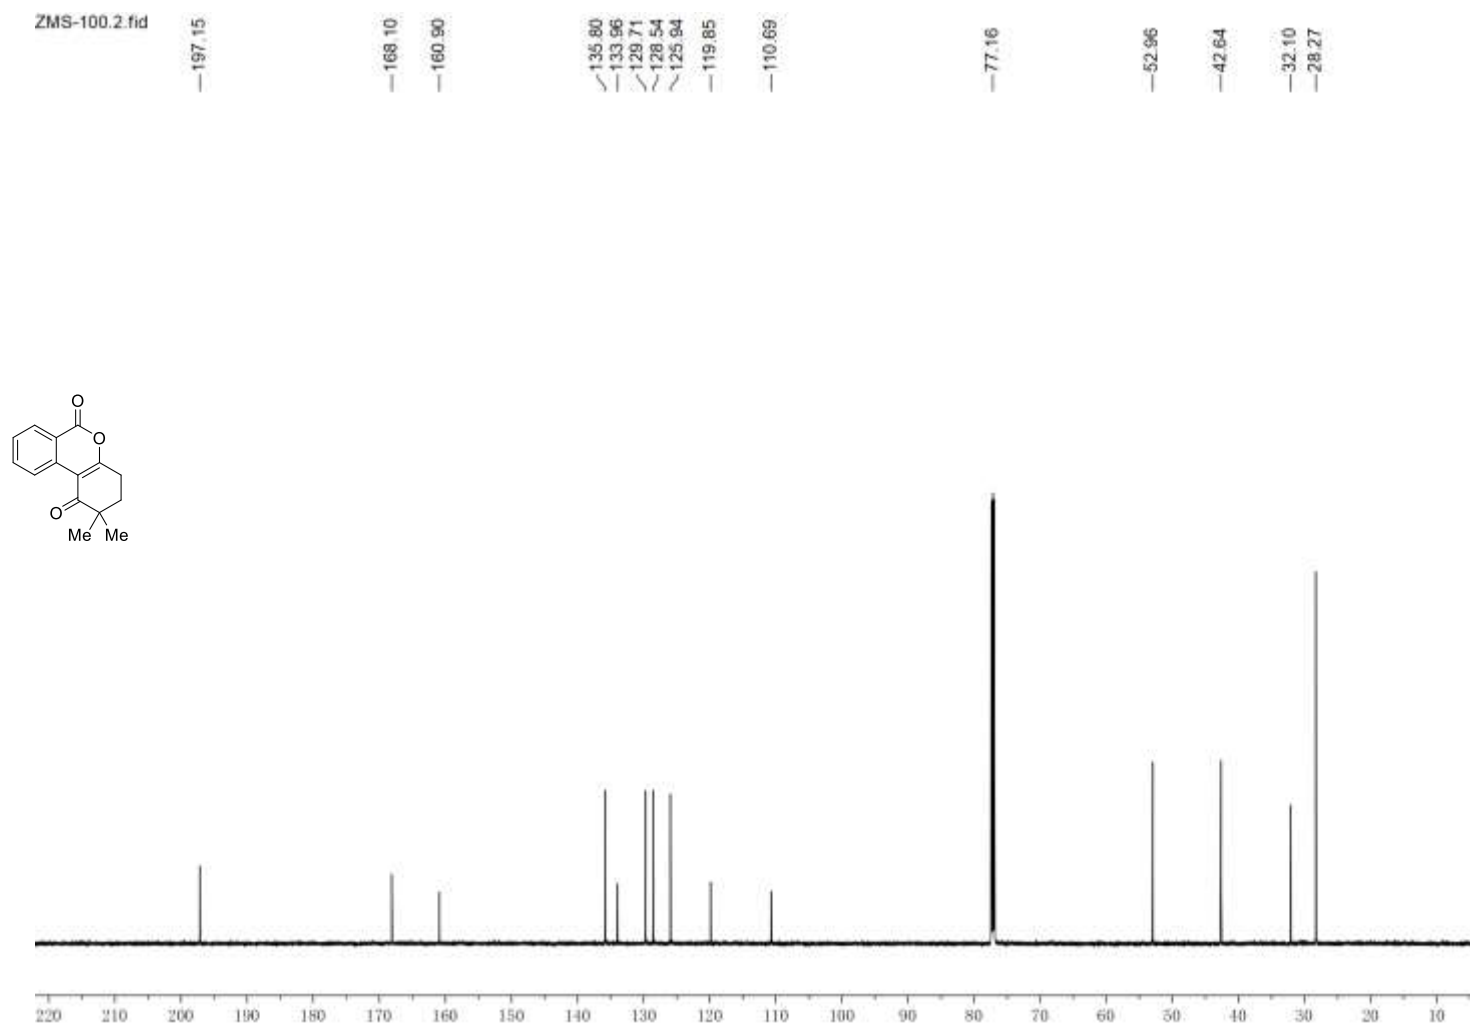

**Figure S47.**  $^{13}\text{C}$  NMR (150 MHz,  $\text{CDCl}_3$ ) spectra of compound **3y**

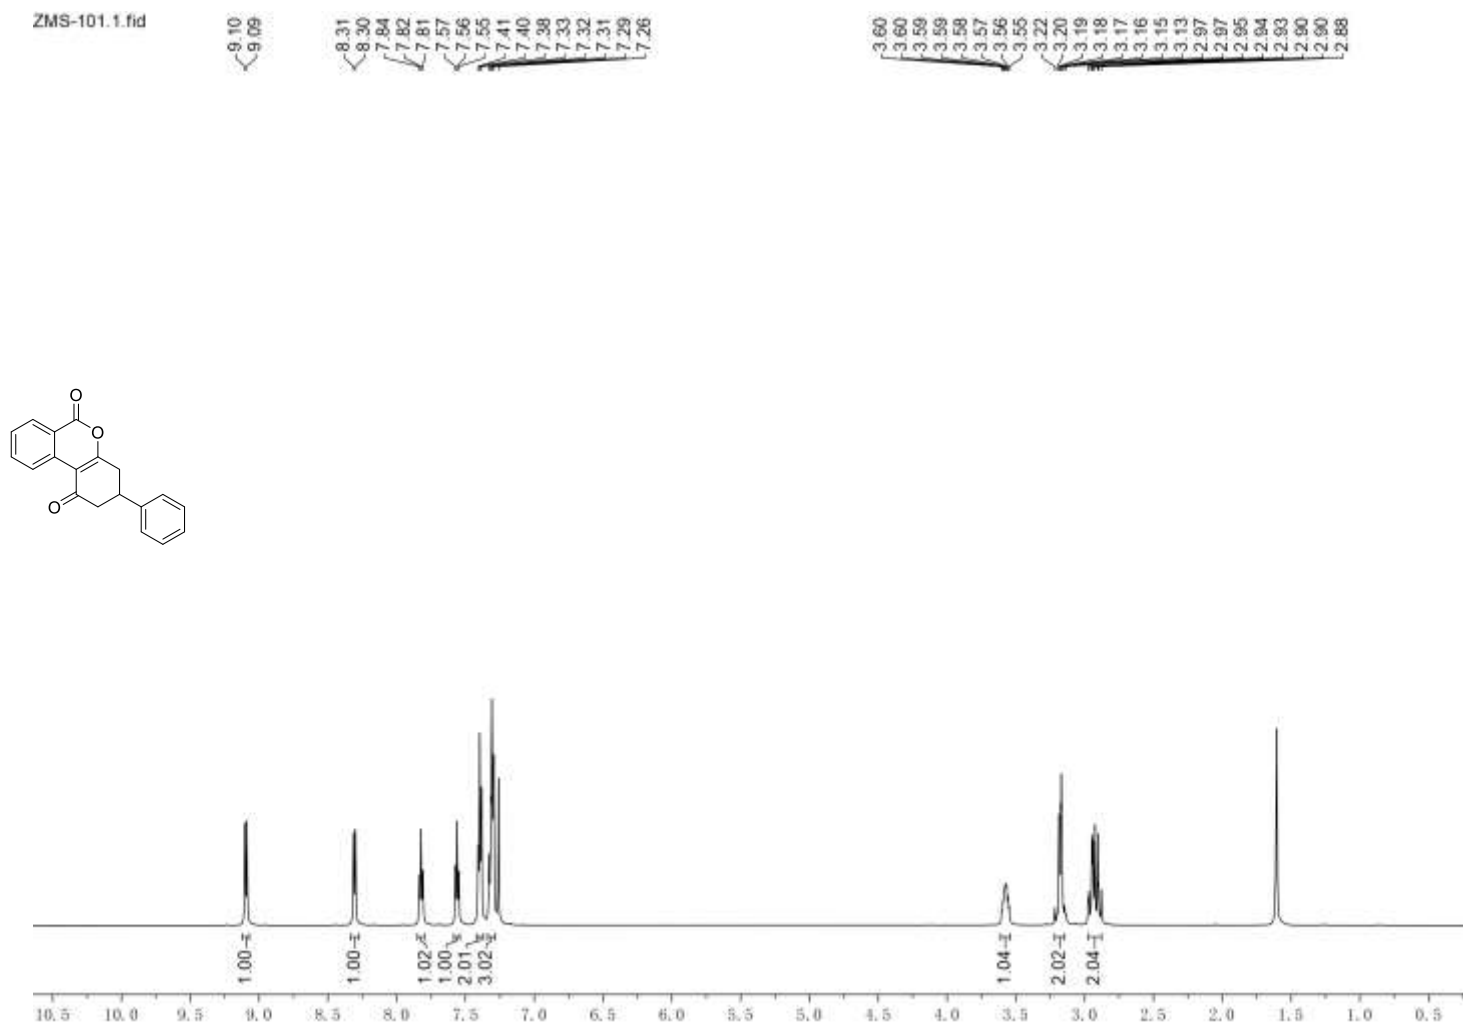

**Figure S48.**  $^1\text{H}$  NMR (600 MHz,  $\text{CDCl}_3$ ) spectra of compound **3z**



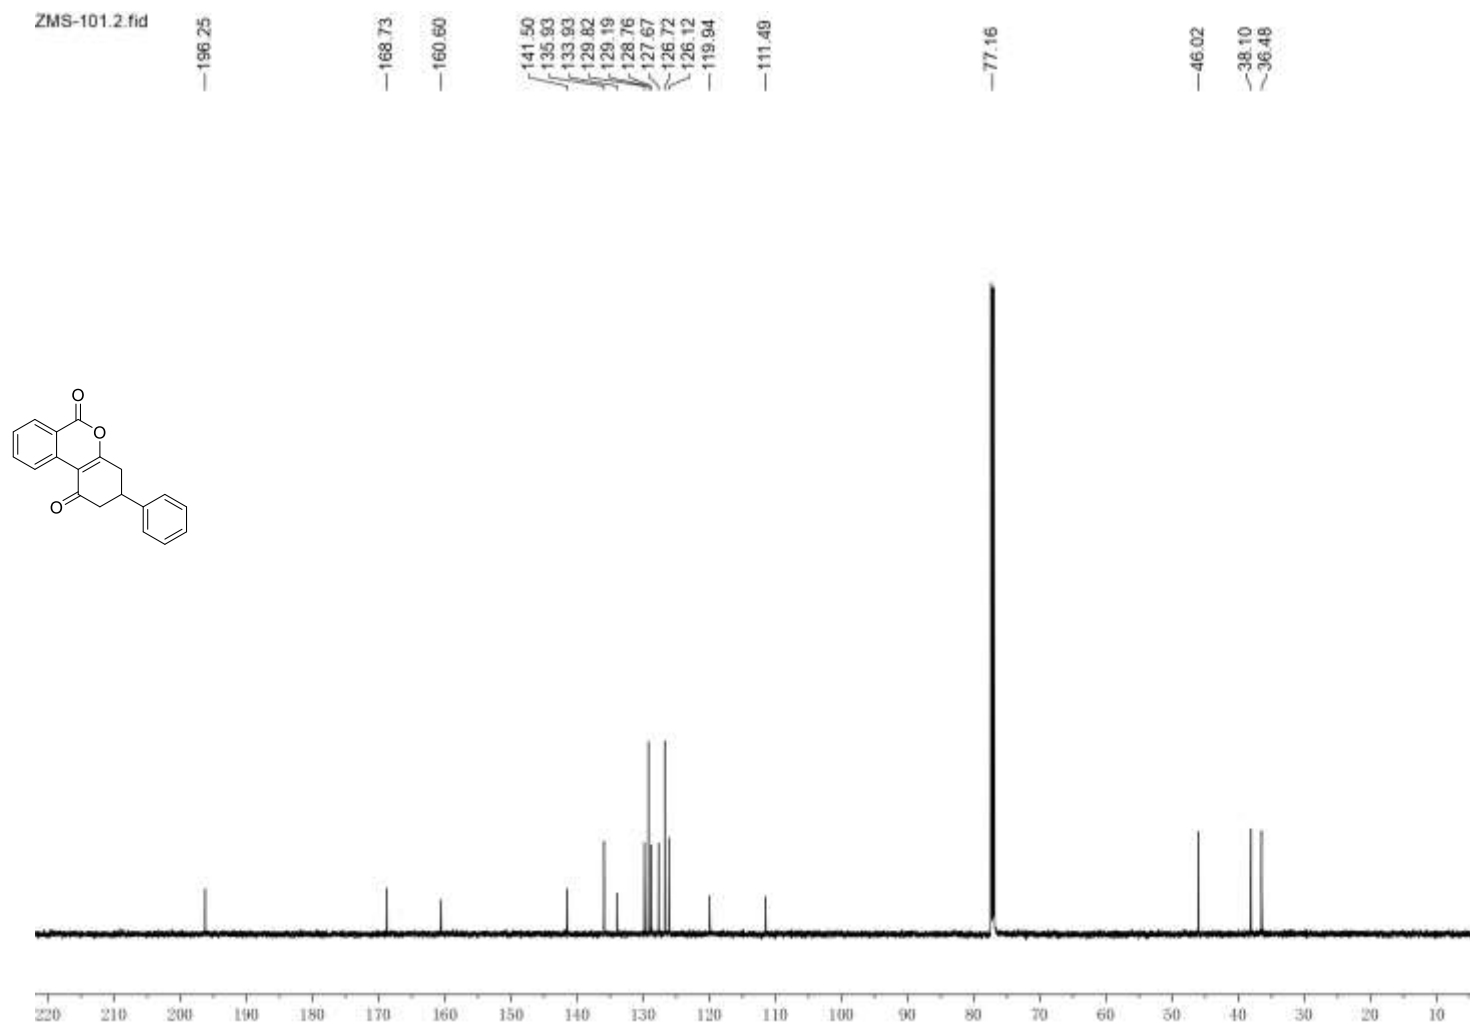

**Figure S49.**  $^{13}\text{C}$  NMR (150 MHz,  $\text{CDCl}_3$ ) spectra of compound **3z**

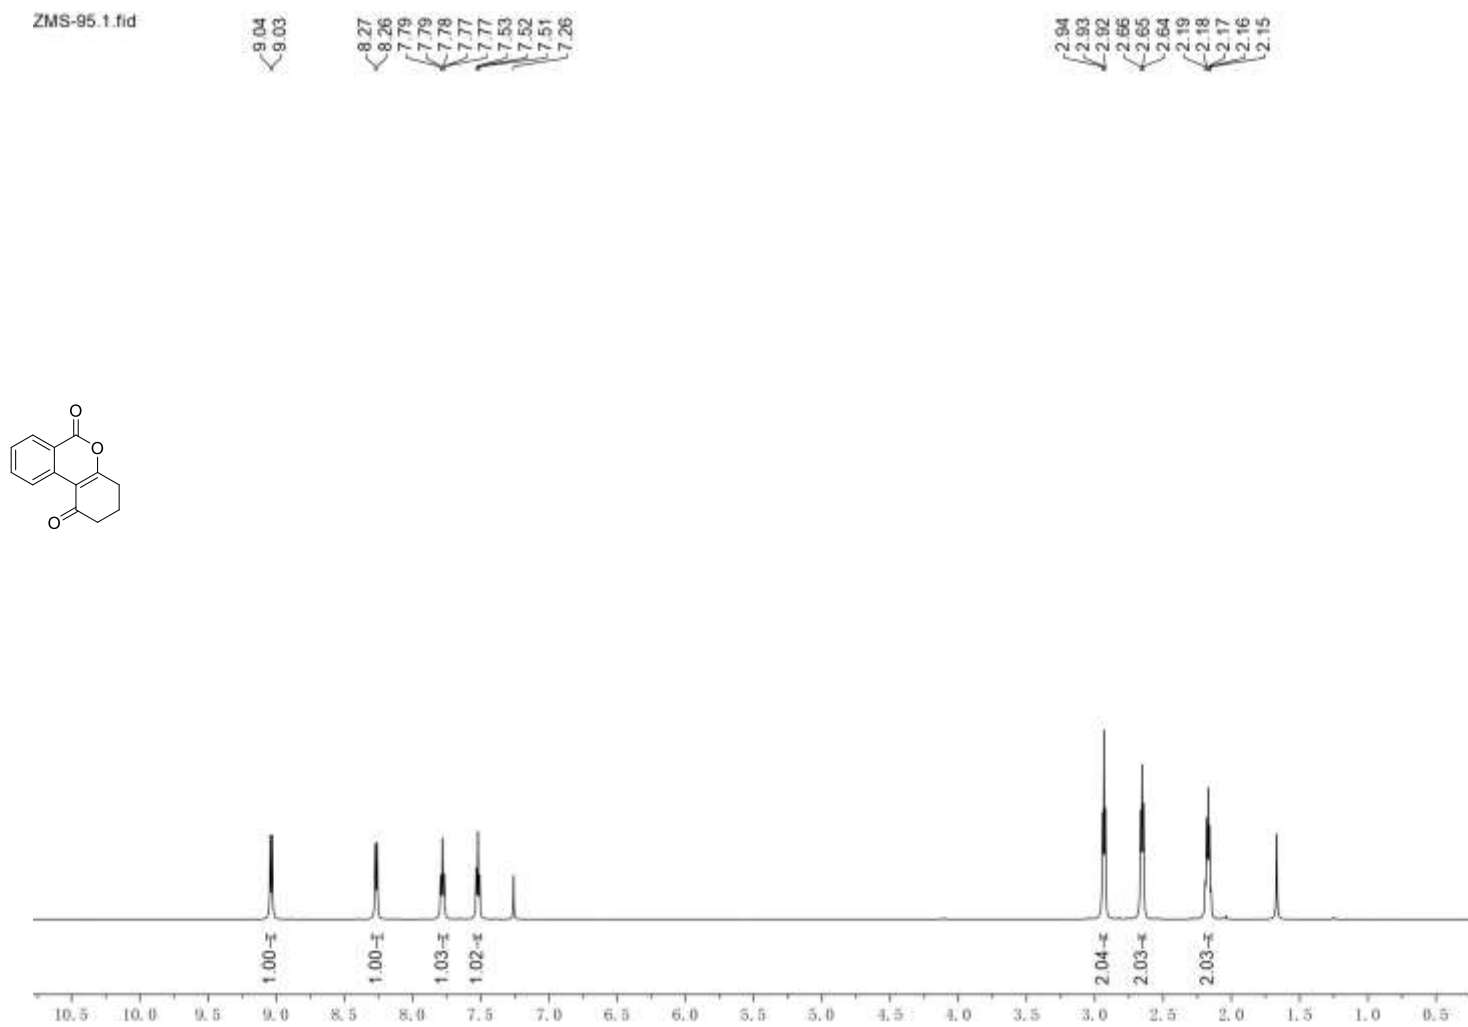

Figure S50.  $^1\text{H}$  NMR (600 MHz,  $\text{CDCl}_3$ ) spectra of compound 3a'

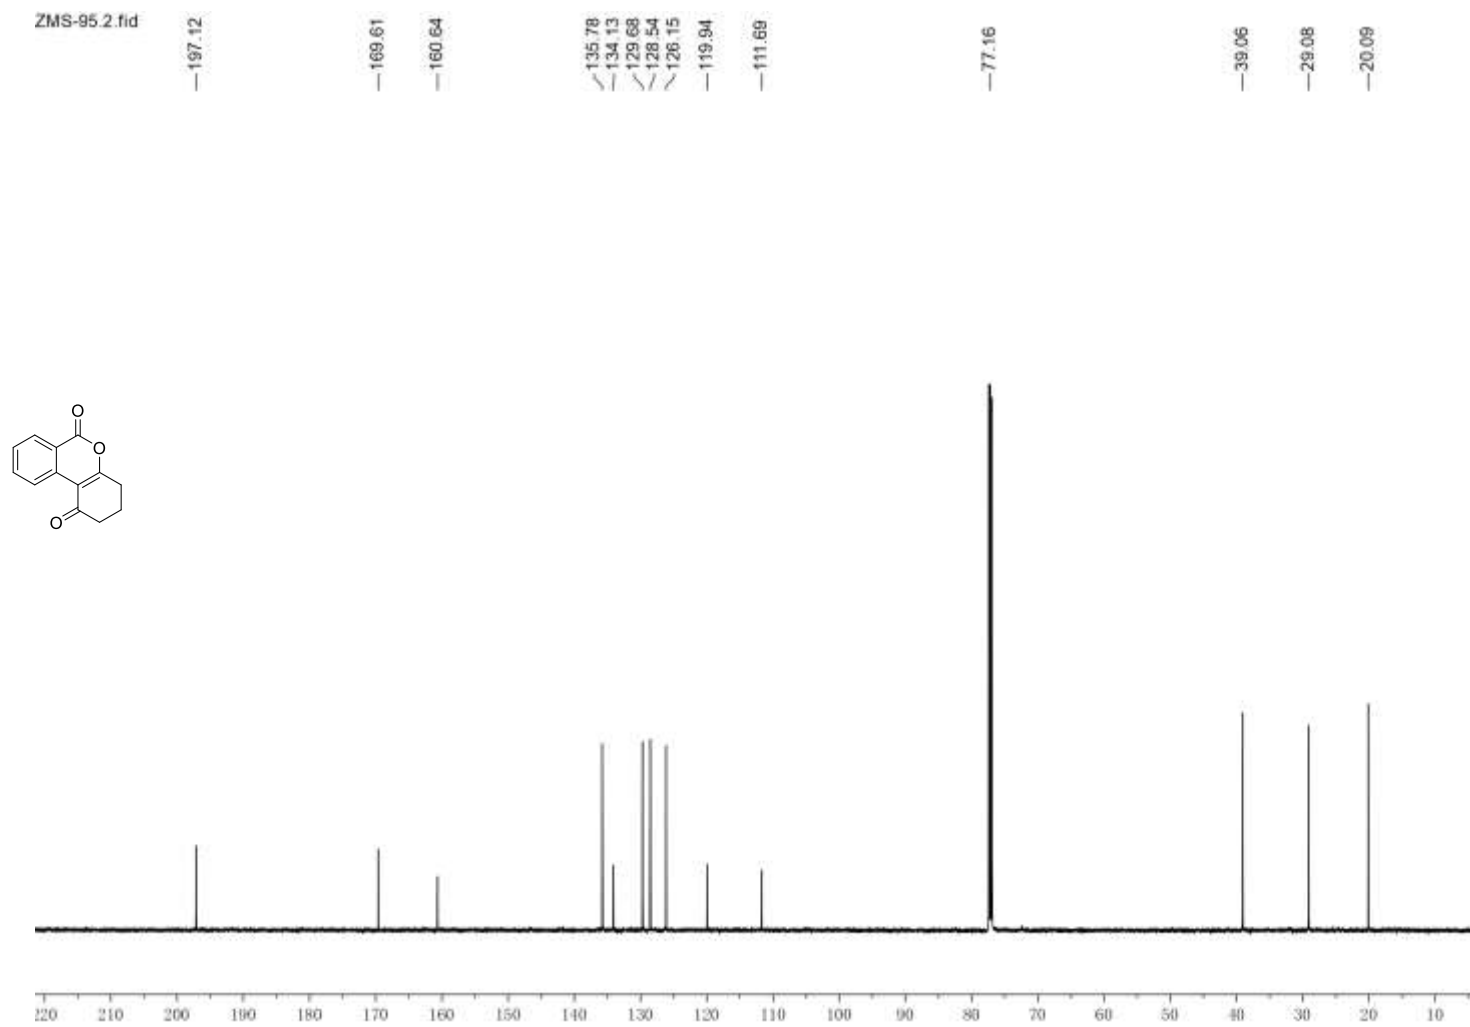

**Figure S51.**  $^{13}\text{C}$  NMR (150 MHz,  $\text{CDCl}_3$ ) spectra of compound **3a'**

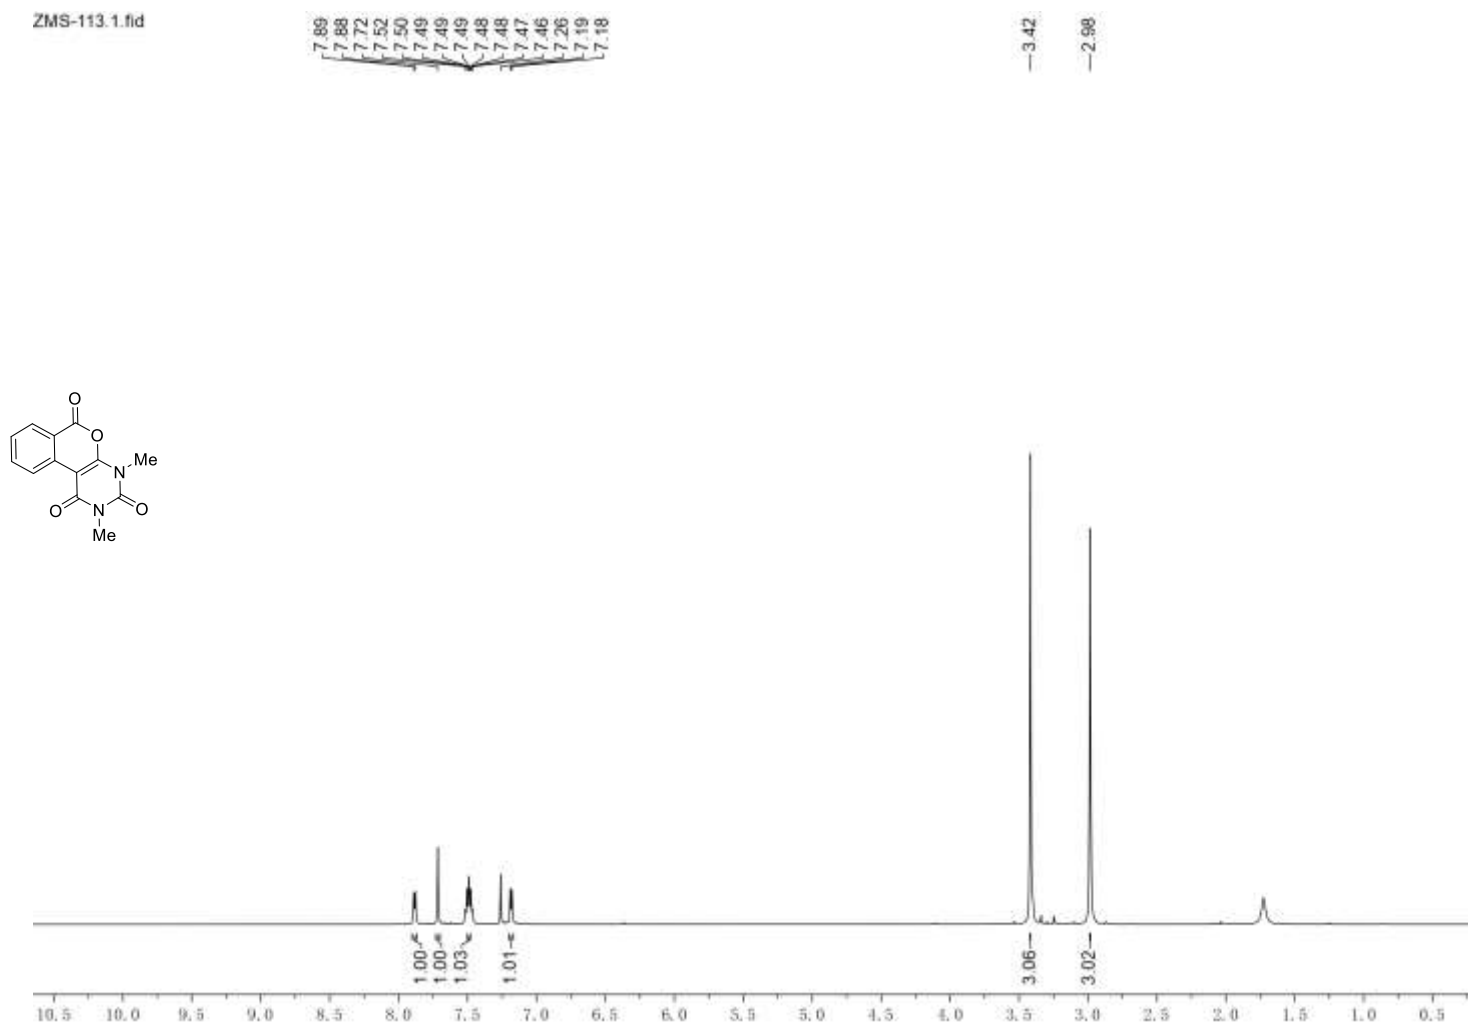

**Figure S52.**  $^1\text{H}$  NMR (600 MHz,  $\text{CDCl}_3$ ) spectra of compound **3b'**

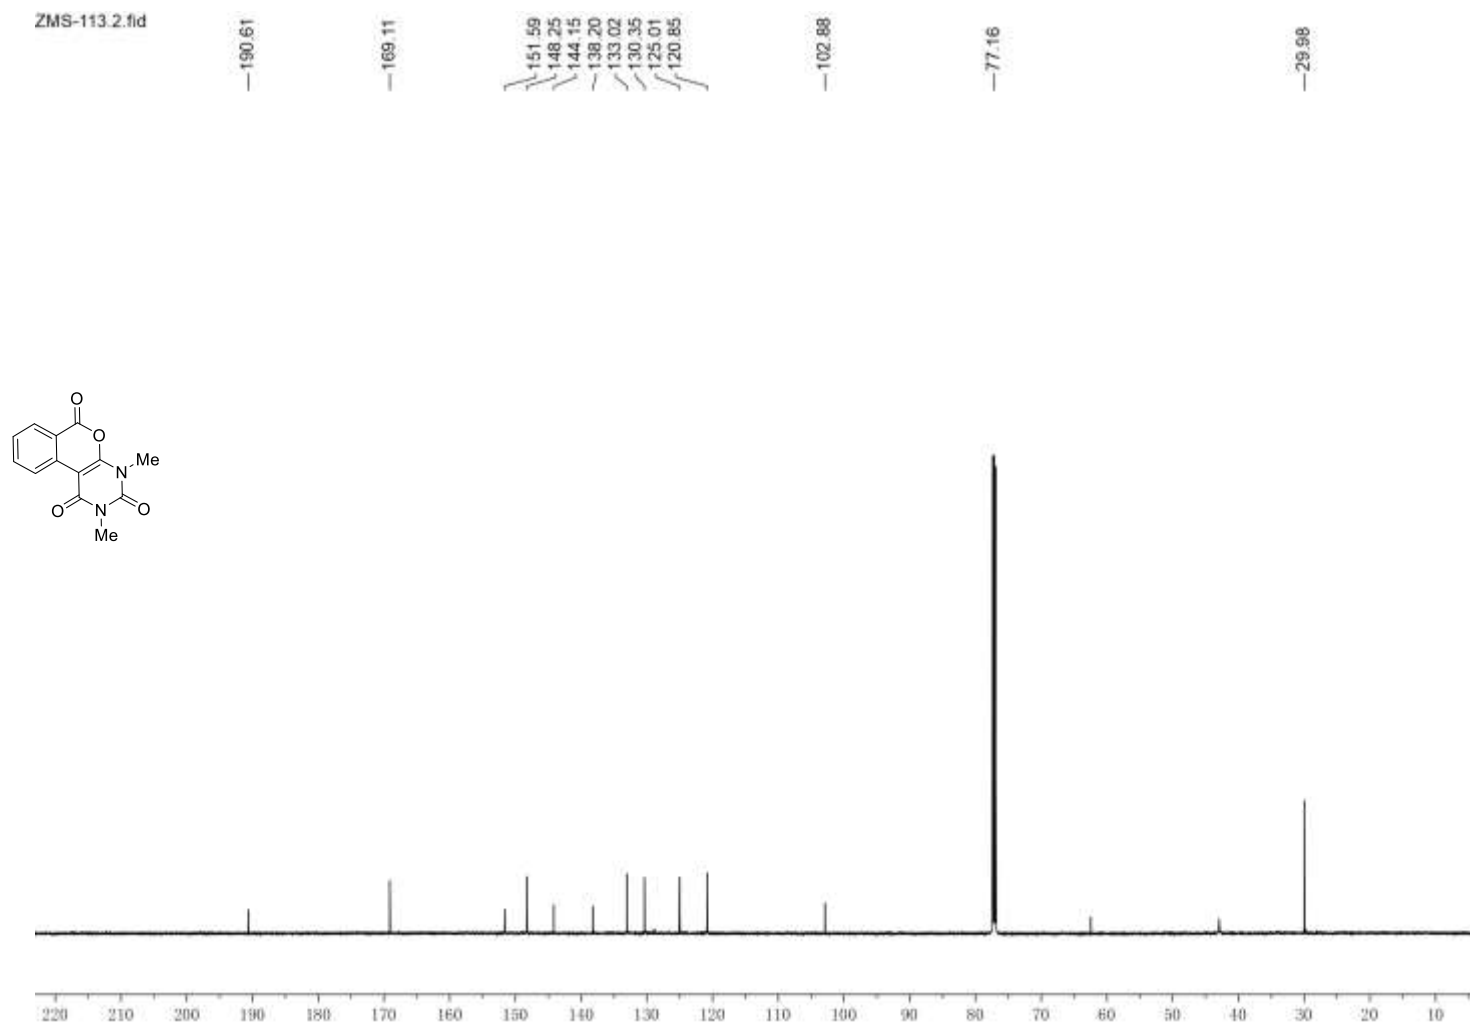

**Figure S53.**  $^{13}\text{C}$  NMR (150 MHz,  $\text{CDCl}_3$ ) spectra of compound **3b'**

ZMS-96.1.fid

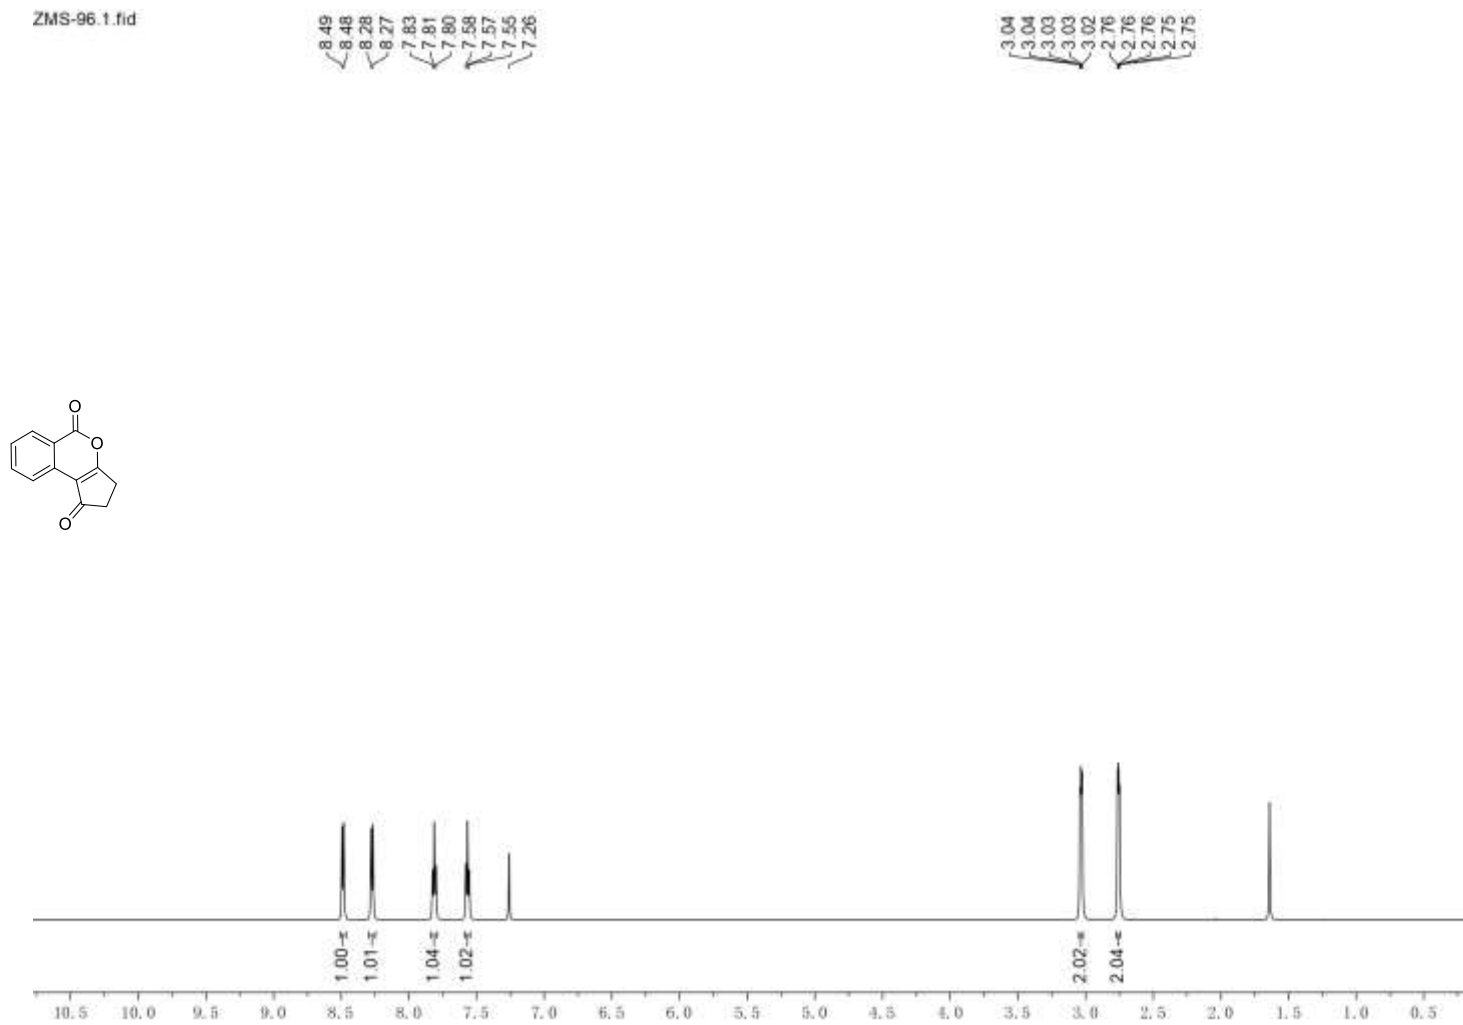

Figure S54. <sup>1</sup>H NMR (600 MHz, CDCl<sub>3</sub>) spectra of compound 3c'

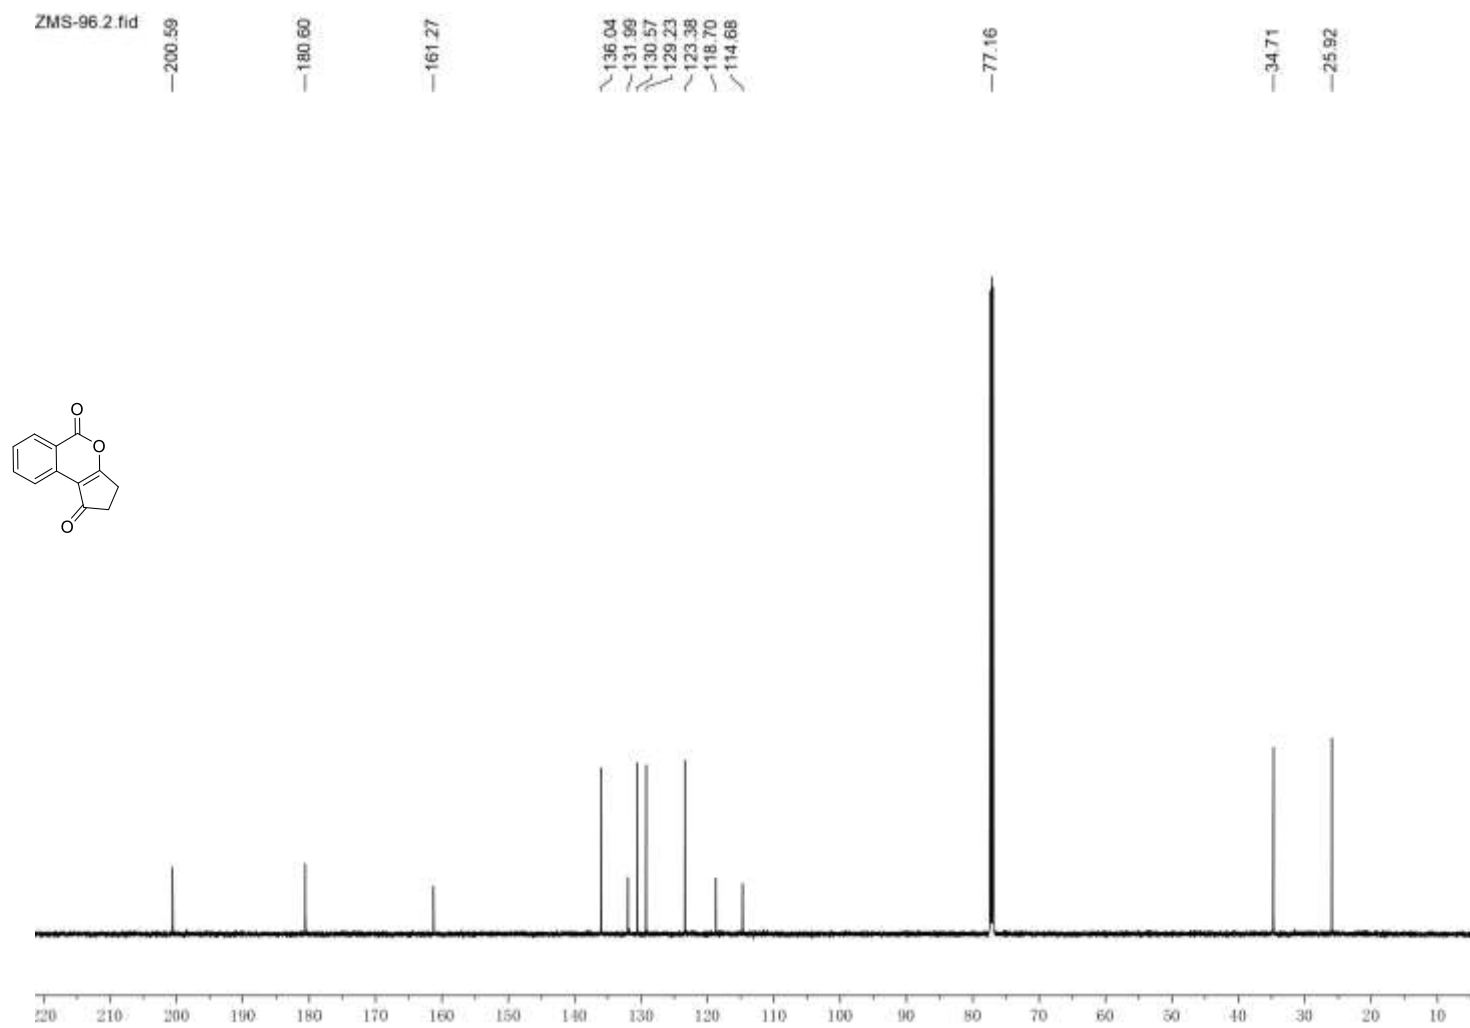

**Figure S55.**  $^{13}\text{C}$  NMR (150 MHz,  $\text{CDCl}_3$ ) spectra of compound **3c'**

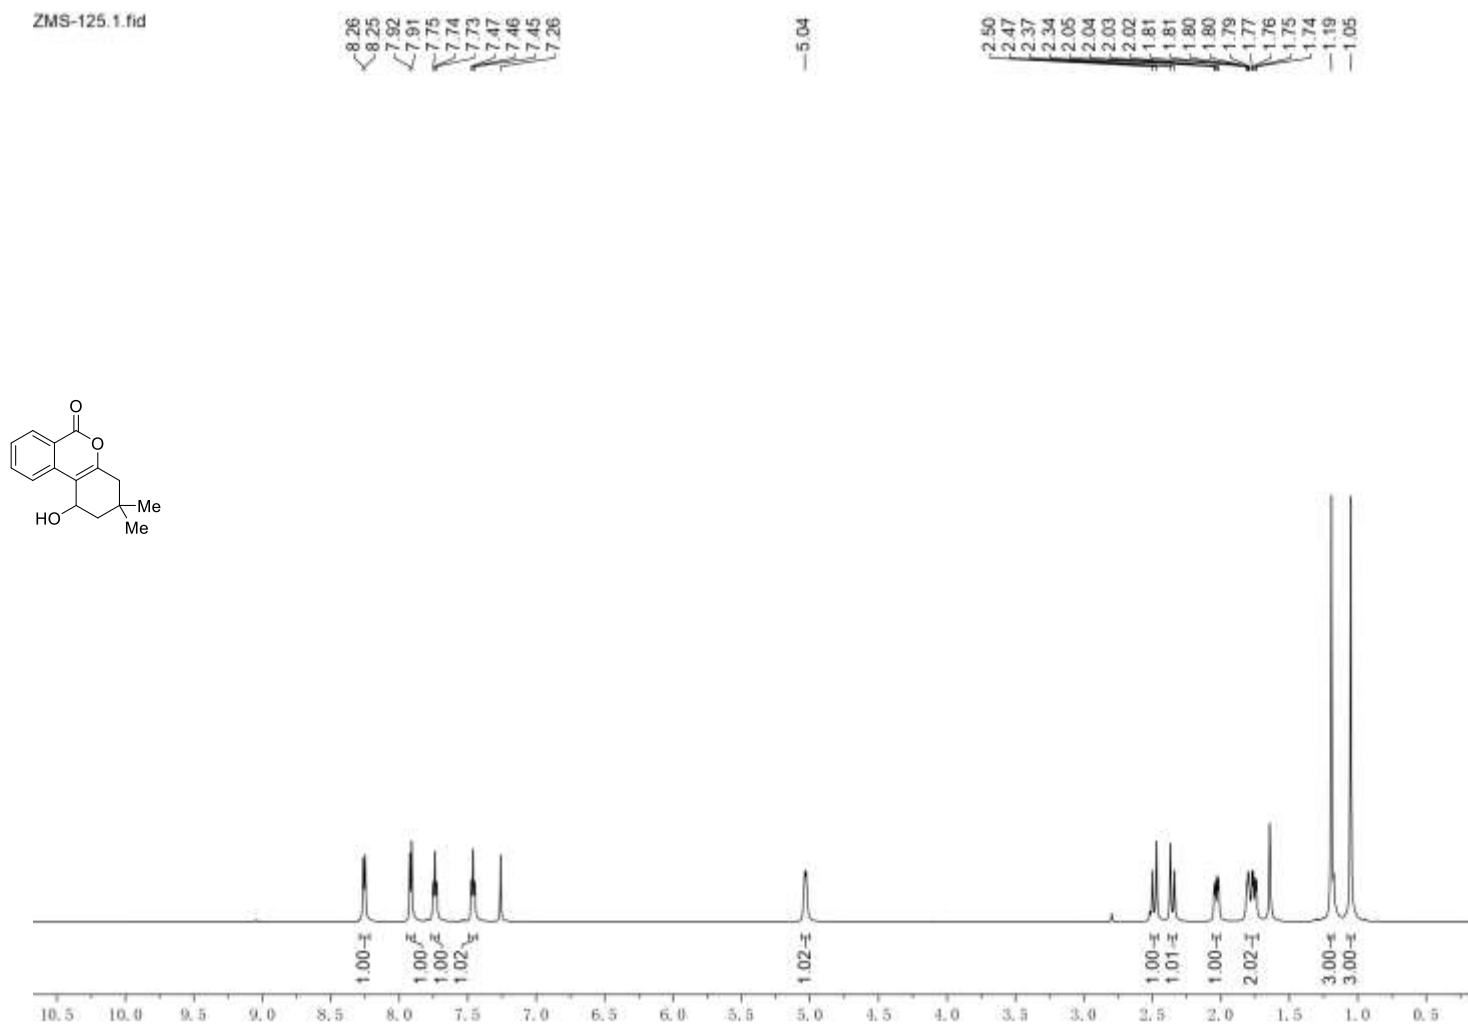

Figure S56.  $^1\text{H}$  NMR (600 MHz,  $\text{CDCl}_3$ ) spectra of compound 4



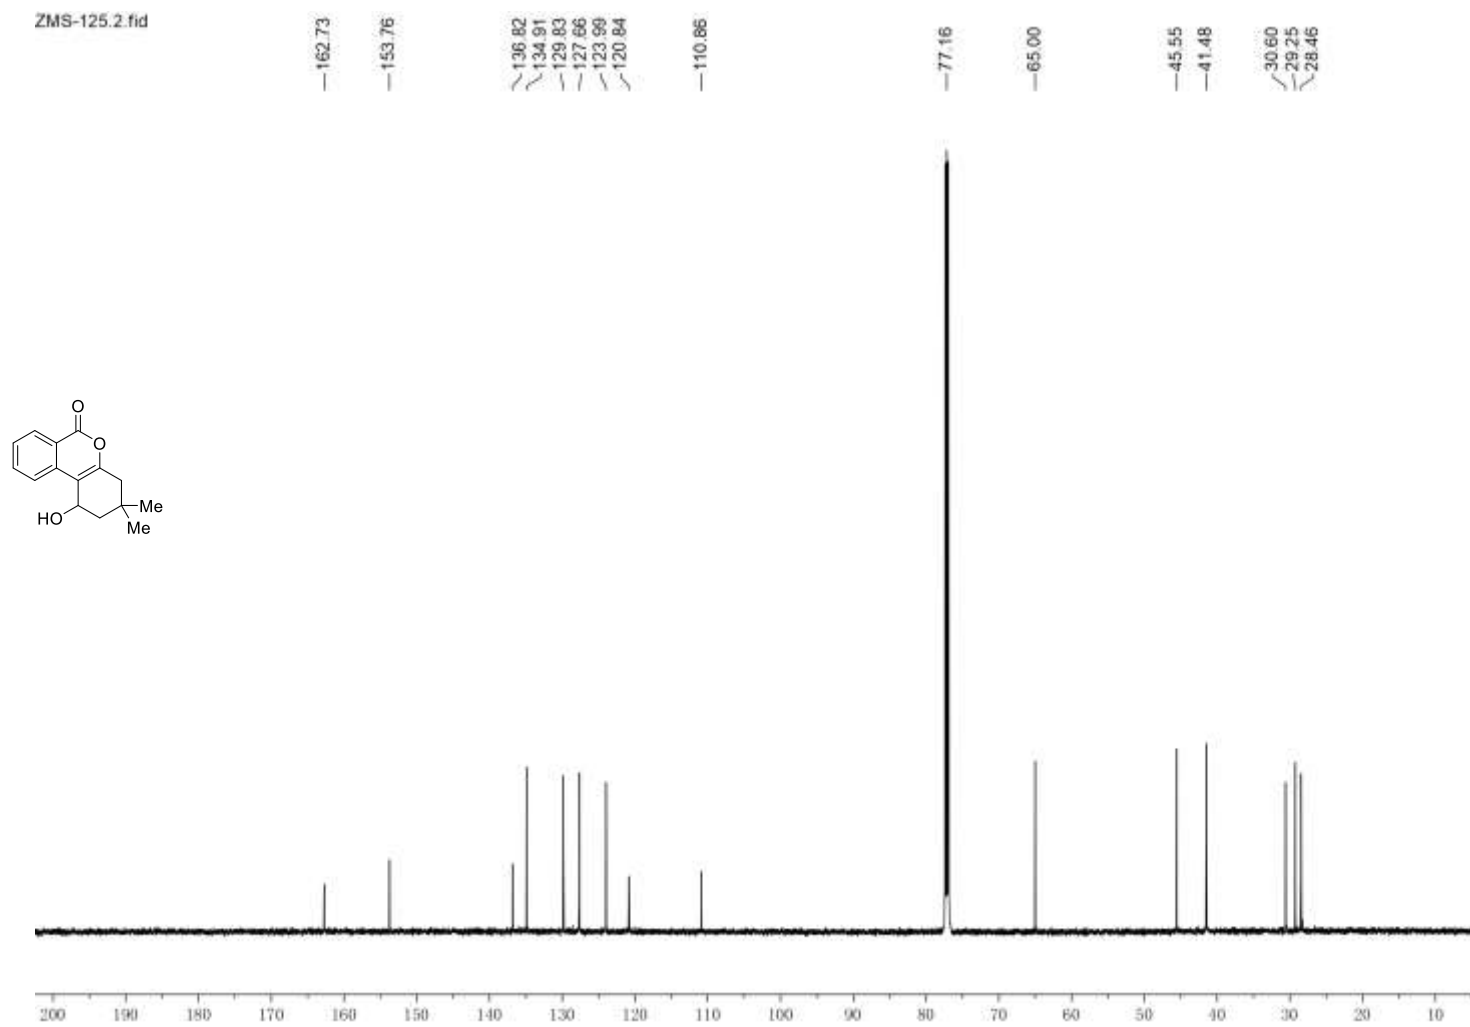

Figure S57.  $^{13}\text{C}$  NMR (150 MHz,  $\text{CDCl}_3$ ) spectra of compound 4

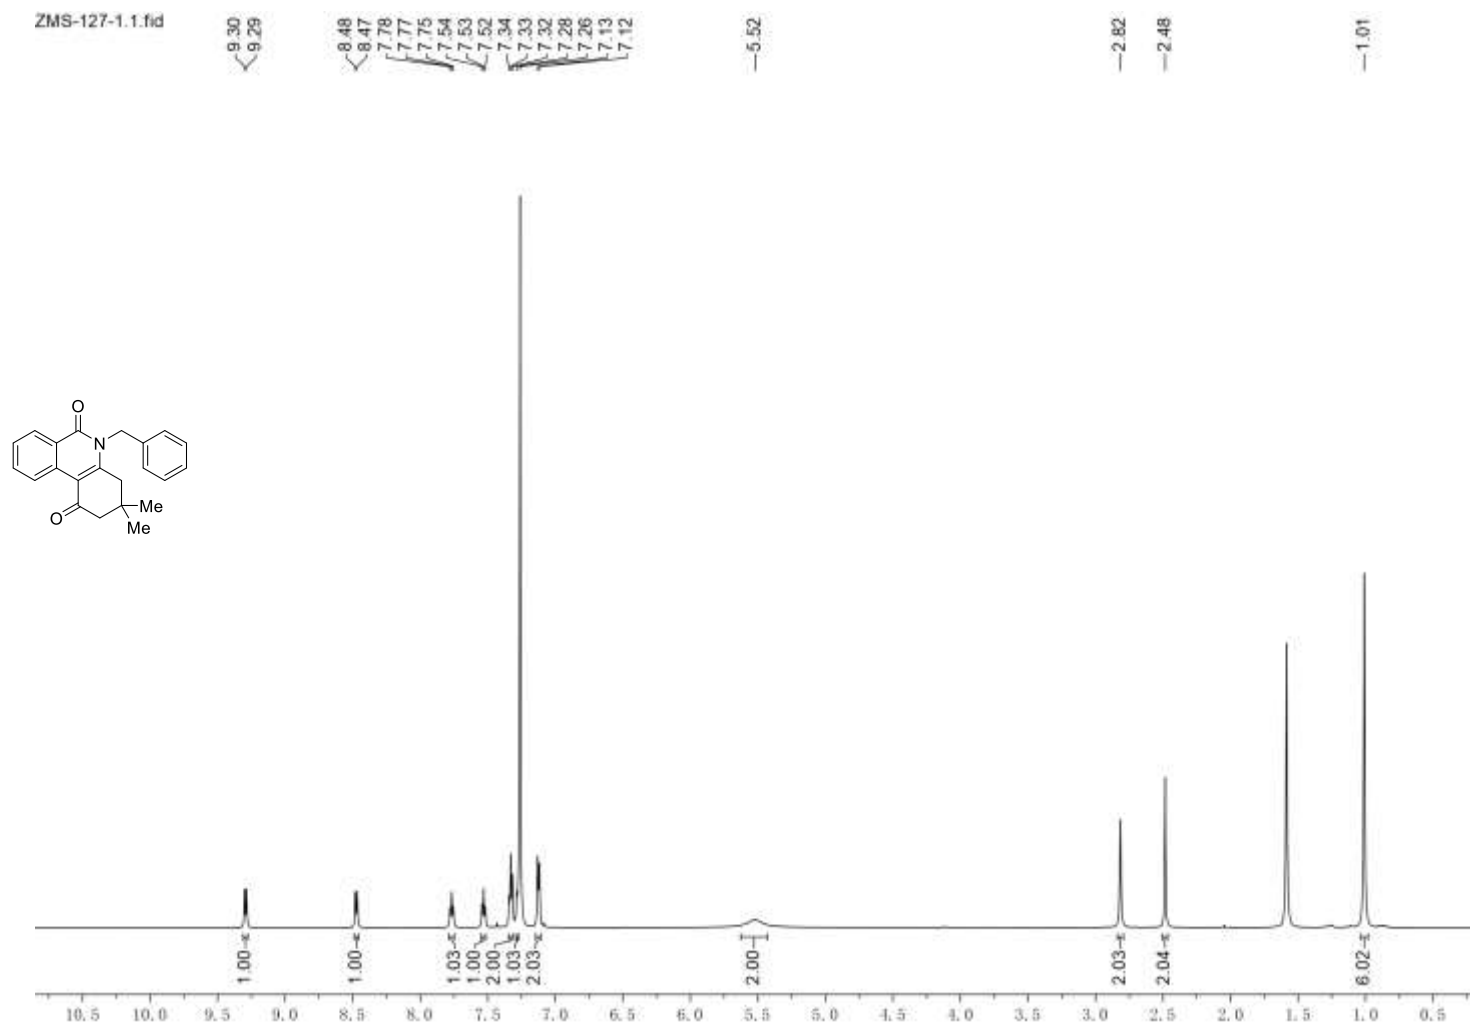

Figure S58.  $^1\text{H}$  NMR (600 MHz,  $\text{CDCl}_3$ ) spectra of compound 5

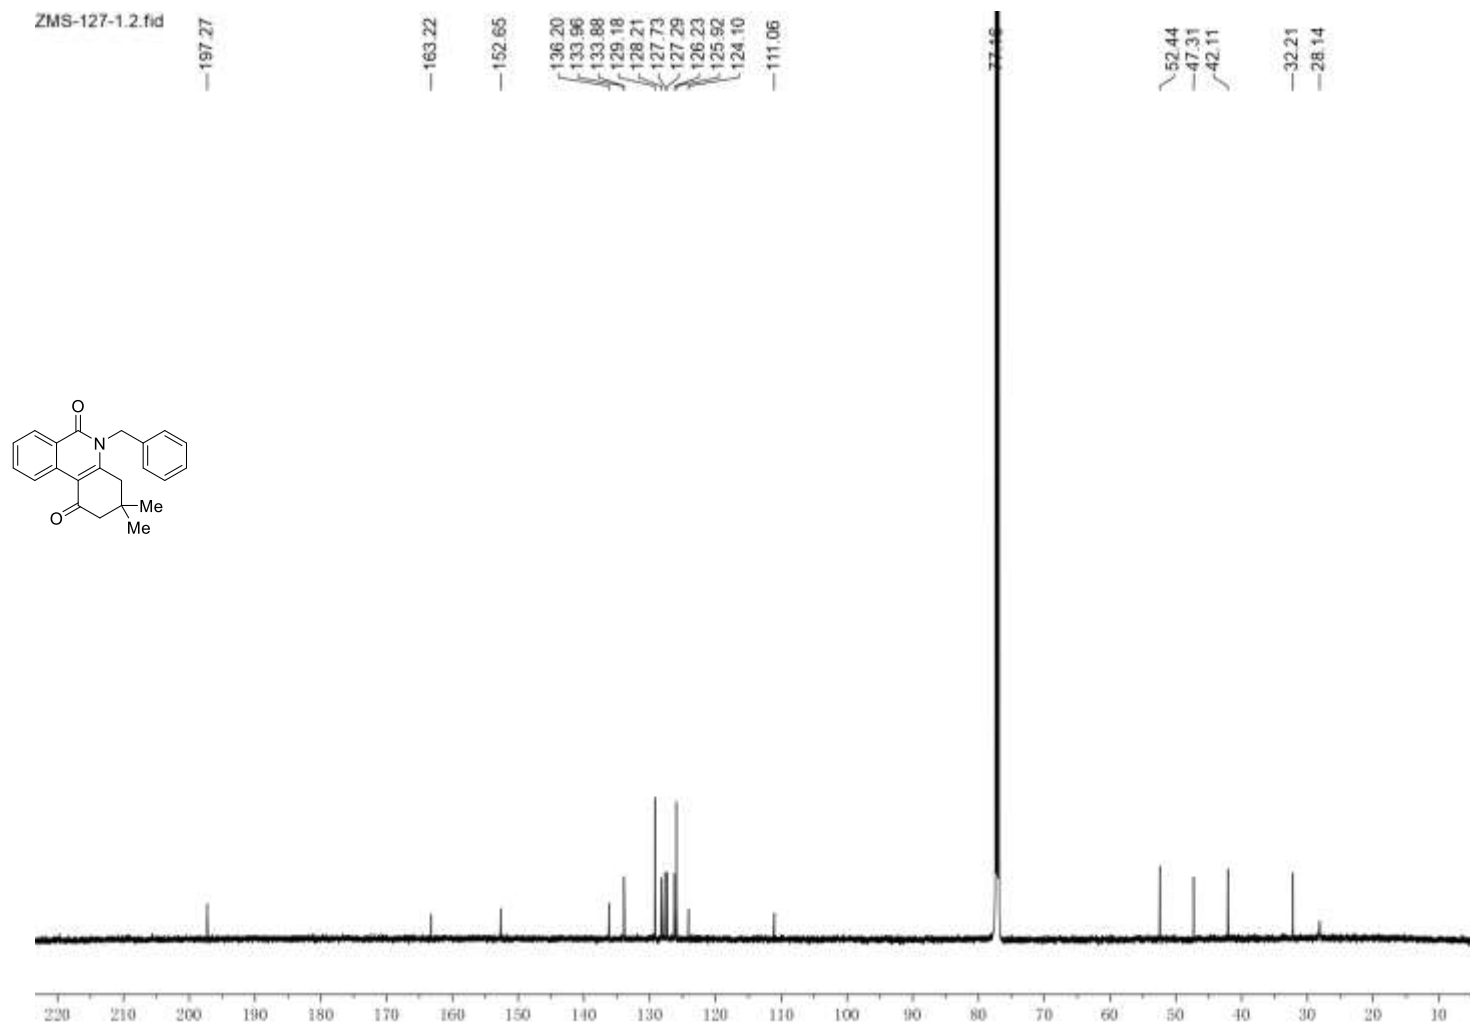

Figure S59.  $^{13}\text{C}$  NMR (150 MHz,  $\text{CDCl}_3$ ) spectra of compound **5**

ZMS-140-2.1.fid

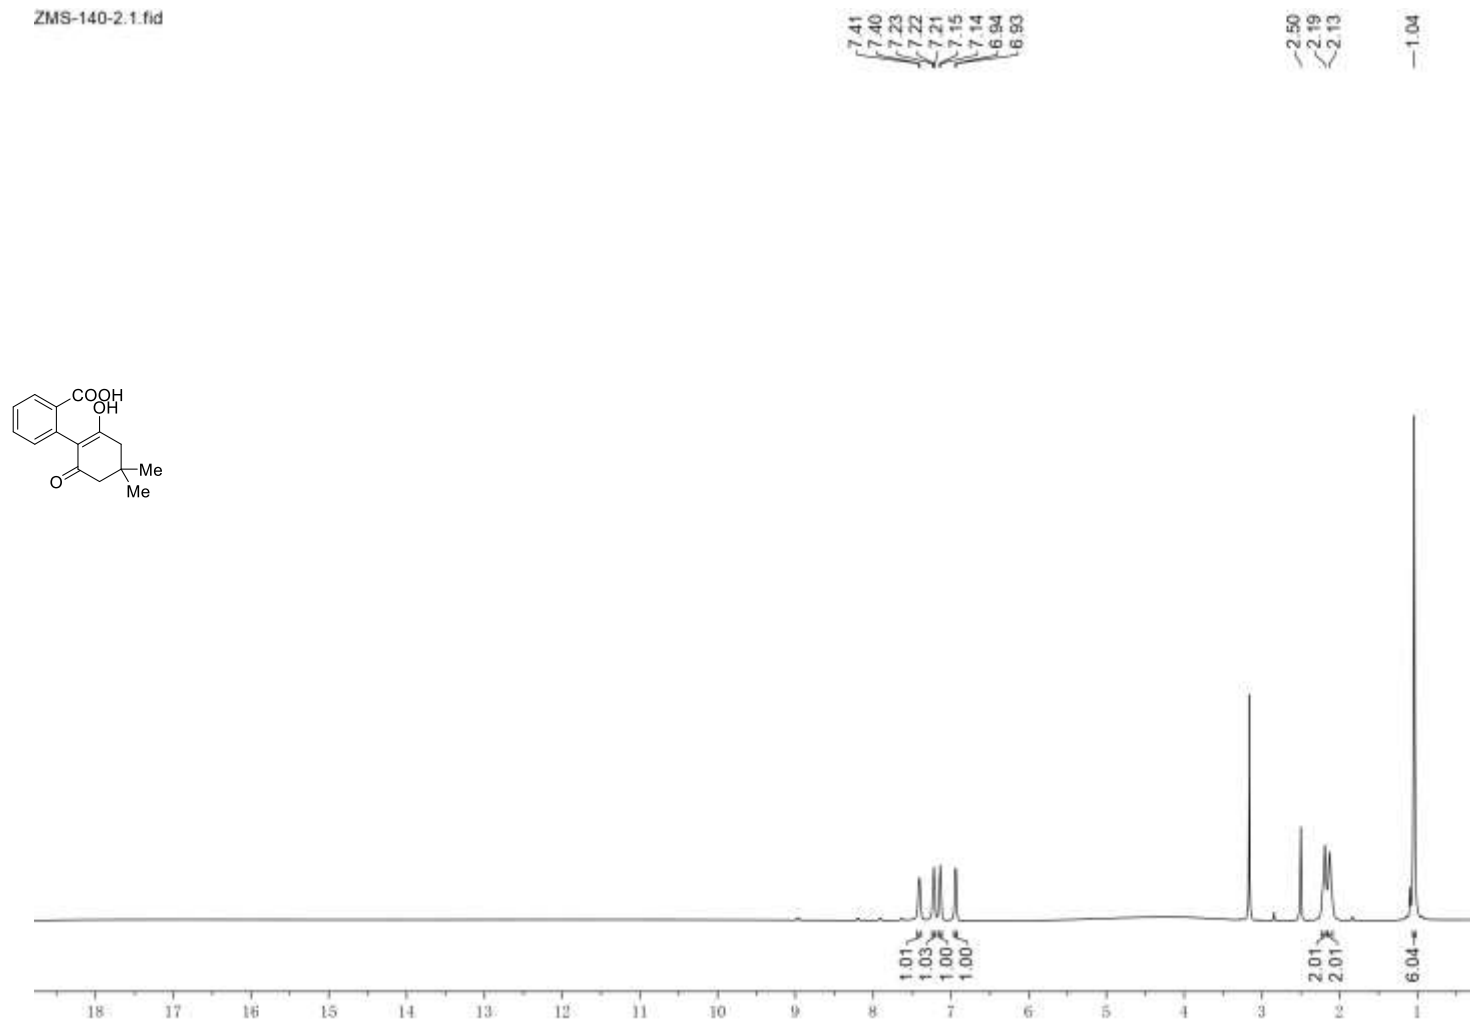

**Figure S60.** <sup>1</sup>H NMR (600 MHz, DMSO-*d*<sub>6</sub>) spectra of compound **6**

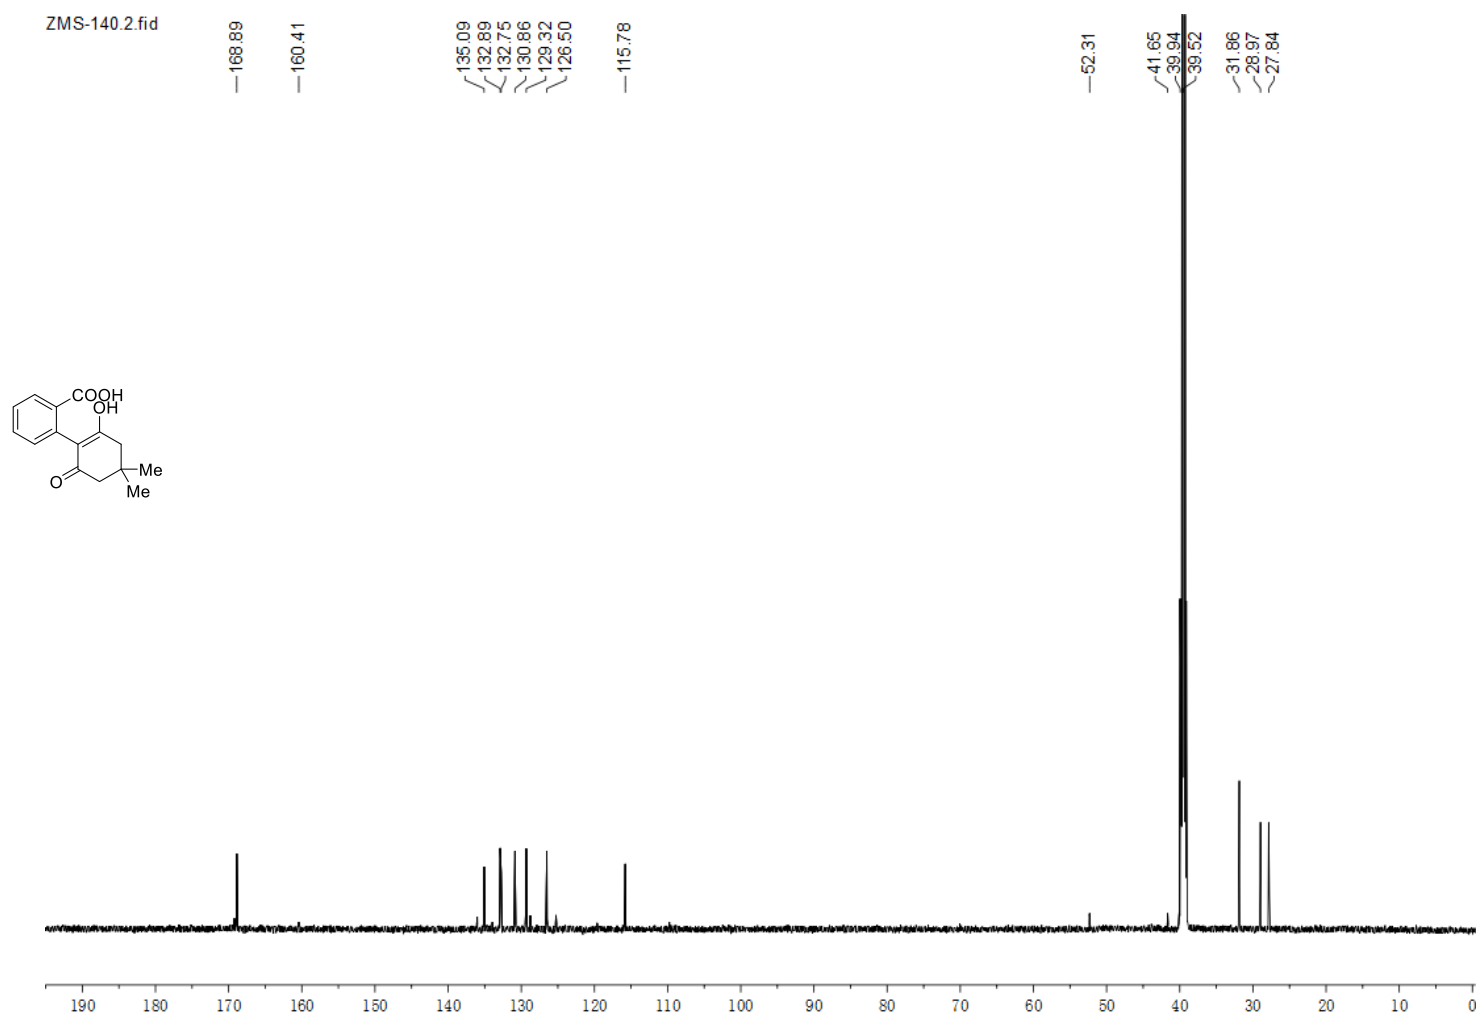

**Figure S61.**  $^{13}\text{C}$  NMR (150 MHz,  $\text{DMSO-}d_6$ ) spectra of compound **6**

## 6. References and notes.

1. (a) Tingoli, M.; Mazzella, M.; Panunzi, B.; Tuzi, A. L-Proline-catalyzed activation of methyl ketones or active methylene compounds and DMF-DMA for syntheses of (2E)-3-dimethylamino-2-propen-1-ones. *Eur. J. Org. Chem.* **2011**, 399. (b) Das, B.; enkateswarlu, K.; Majhi, V.; Reddy, M. R.; Reddy, K. N.; Yerra Rao, K.; Ravikumar, K.; Sridhar, B. Highly efficient, mild and chemo- and stereoselective synthesis of enaminones and enamino esters using silica supported perchloric acid under solvent-free conditions. *J. Mol. Catal. A: Chem.* **2006**, 246, 276. (c) Liu, Y.; Zhou, R. Wan, J.-P. Water-promoted synthesis of enaminones. Mechanism investigation and application in multicomponent reactions. *Synth. Commun.* **2013**, 43, 2475.
2. (a) Moriarty, R. M.; Tyagi, S.; Ivanov, D.; Constantinescu, M. The mechanism of 1,4 alkyl group migration in hypervalent halonium ylides: the stereochemical course. *J. Am. Chem. Soc.* **2008**, 130, 7564. (b) Jiang, Y.; Li, P.; Zhao, J.; Liu, B.; Li, X. Iodonium ylides as carbene precursors in Rh(III)-catalyzed C–H activation. *Org. Lett.* **2020**, 22, 7475.
3. CCDC 2209204 contain the supplementary crystallographic data for compound **3b**. These data can be obtained free of charge from The Cambridge Crystallographic Data Center via [www.ccdc.cam.ac.uk/data\\_request/cif](http://www.ccdc.cam.ac.uk/data_request/cif).
